# Supplementary material for: Epigenome-wide inheritance of cytosine methylation variants in a recombinant inbred population
Source: HighWire-hosted journal article supplement (doi:10.1101/gr.152538.112), 2013-06-05
Supplement: Supplemental_Tables.xlsx [file Supplemental_Tables.xlsx]

## Sheet: Supplementary Table 1
Supplementary Table 1 - A summary of the MethylC-Seq results for each genotype sequenced
Sample	Tissue	Total mCs Called	Total Mapped Reads	Coverage	Total Bases Covered	Fraction Bases Covered	Total Cs Covered	Fraction Cs Covered	Cytosine Non-conversion Rate
LD	Leaf	44015122	161014659	16.9477	832049364	0.875778	226924469	0.698128	0.003
LDX	Leaf	45755906	168180728	17.702	842483374	0.88676	250822201	0.771648	0.0032
R-11268	Leaf	34623553	103639310	10.9086	799374647	0.841386	218582758	0.672465	0.0045
R-11272	Leaf	35731956	110676035	11.6493	785259874	0.826529	208482248	0.641391	0.0061
R-11185	Leaf	NA	16262328	1.7117	631534652	0.664725	208768914	0.642273	0.00374484
R-11186	Leaf	NA	38648126	4.06793	751229568	0.790711	250448719	0.770499	0.00296965
R-11187	Leaf	NA	30361634	3.19573	728993954	0.767306	241878244	0.744133	0.00330729
R-11188	Leaf	NA	35167812	3.70161	746604668	0.785843	249035778	0.766153	0.00476331
R-11189	Leaf	NA	28341915	2.98314	726006030	0.764162	240707930	0.740532	0.003593
R-11194	Leaf	NA	36231403	3.81356	745262334	0.78443	248385259	0.764151	0.00459047
R-11195	Leaf	NA	35206117	3.70564	741503022	0.780473	246570623	0.758569	0.00406104
R-11196	Leaf	NA	24881526	2.61892	703253650	0.740213	231919380	0.713494	0.00416342
R-11197	Leaf	NA	21363925	2.24867	670369325	0.705601	219392674	0.674956	0.00431213
R-11199	Leaf	NA	33904673	3.56865	736845263	0.77557	244809852	0.753152	0.00417724
R-11200	Leaf	NA	37188291	3.91427	747014061	0.786274	248743179	0.765252	0.00403333
R-11202	Leaf	NA	22003219	2.31596	684306050	0.72027	225184095	0.692773	0.00456263
R-11205	Leaf	NA	36029877	3.79234	745675341	0.784865	248463133	0.764391	0.00357977
R-11206	Leaf	NA	28839670	3.03553	717871167	0.755599	237551342	0.730821	0.00400281
R-11208	Leaf	NA	17000593	1.78941	633394001	0.666682	206318867	0.634735	0.00457207
R-11209	Leaf	NA	122084024	12.85	811831590	0.854498	274270757	0.843787	0.00316257
R-11210	Leaf	NA	40842496	4.2989	757388312	0.797193	252817944	0.777788	0.00387059
R-11211	Leaf	NA	37637622	3.96157	745417685	0.784593	247905925	0.762677	0.0039633
R-11212	Leaf	NA	26690211	2.80929	705781197	0.742874	232572444	0.715503	0.00400659
R-11214	Leaf	NA	18627523	1.96065	657206854	0.691747	215481217	0.662923	0.00366584
R-11215	Leaf	NA	33663465	3.54327	718705334	0.756477	236555106	0.727756	0.0040079
R-11216	Leaf	NA	26978617	2.83965	712308125	0.749744	235615424	0.724865	0.00356079
R-11217	Leaf	NA	113380663	11.9339	783357463	0.824527	261767345	0.805321	0.00424691
R-11218	Leaf	NA	101031836	10.6342	799024328	0.841017	268792051	0.826932	0.00424037
R-11219	Leaf	NA	35943040	3.7832	751079129	0.790552	250432357	0.770449	0.00311232
R-11220	Leaf	NA	30495169	3.20979	732426215	0.770919	243346199	0.748649	0.0042949
R-11221	Leaf	NA	66715104	7.02213	786423588	0.827754	228733462	0.703693	0.00383206
R-11223	Leaf	NA	28281405	2.97677	715229049	0.752818	236457933	0.727457	0.00306892
R-11224	Leaf	NA	24182174	2.54531	693648713	0.730104	228368799	0.702571	0.00333131
R-11225	Leaf	NA	39367869	4.14369	754139148	0.793773	251690714	0.77432	0.00375854
R-11228	Leaf	NA	37685368	3.96659	745575947	0.78476	247941276	0.762785	0.00424048
R-11230	Leaf	NA	37620251	3.95974	748459519	0.787795	249269499	0.766872	0.00339678
R-11231	Leaf	NA	35498936	3.73646	736770017	0.775491	244277061	0.751512	0.0032872
R-11232	Leaf	NA	40933017	4.30843	758366860	0.798223	253376350	0.779506	0.00356671
R-11233	Leaf	NA	27791654	2.92523	717324733	0.755024	237319893	0.730109	0.00399268
R-11234	Leaf	NA	70967598	7.46973	793708624	0.835422	239390780	0.73648	0.00348059
R-11236	Leaf	NA	36738350	3.86691	750065373	0.789485	250288462	0.770006	0.00305344
R-11237	Leaf	NA	130668278	13.7536	820908615	0.864052	277983414	0.855209	0.00409167
R-11238	Leaf	NA	31417833	3.3069	728460446	0.766745	241550828	0.743125	0.00306819
R-11239	Leaf	NA	49261009	5.18499	772991597	0.813616	259162466	0.797307	0.00313217
R-11240	Leaf	NA	40149727	4.22598	749540380	0.788933	249480900	0.767522	0.00323985
R-11241	Leaf	NA	28485032	2.99821	713615487	0.75112	235368711	0.724106	0.0033821
R-11242	Leaf	NA	24895196	2.62036	660750539	0.695477	213487309	0.656789	0.00350628
R-11243	Leaf	NA	35355597	3.72137	746594881	0.785832	249054844	0.766211	0.00293052
R-11244	Leaf	NA	22682727	2.38748	683011062	0.718907	224072827	0.689355	0.00362465
R-11245	Leaf	NA	34067998	3.58585	740565458	0.779486	246467559	0.758251	0.00302751
R-11246	Leaf	NA	49021733	5.15981	772882052	0.813501	258688972	0.79585	0.00352211
R-11247	Leaf	NA	38081790	4.00832	749955385	0.78937	250155342	0.769597	0.00371159
R-11248	Leaf	NA	41446516	4.36248	710504644	0.747845	232515245	0.715328	0.00451568
R-11249	Leaf	NA	135906691	14.3049	820754623	0.86389	277921305	0.855018	0.00387383
R-11250	Leaf	NA	33004946	3.47395	737977414	0.776762	245333652	0.754763	0.00332035
R-11251	Leaf	NA	44137321	4.6457	765925535	0.806179	256198859	0.78819	0.00327621
R-11252	Leaf	NA	30533869	3.21386	723521451	0.761546	239465829	0.736711	0.00356751
R-11253	Leaf	NA	51271286	5.39659	776324854	0.817125	260622427	0.801799	0.00343181
R-11255	Leaf	NA	26740302	2.81456	706275959	0.743395	232810007	0.716234	0.0032868
R-11256	Leaf	NA	37360188	3.93237	744838001	0.783983	247996316	0.762955	0.00334583
R-11257	Leaf	NA	36331319	3.82407	746054607	0.785264	248509069	0.764532	0.00372901
R-11258	Leaf	NA	33727182	3.54997	743019426	0.782069	247610834	0.761769	0.00357948
R-11259	Leaf	NA	38416542	4.04355	750628294	0.790078	250086894	0.769386	0.0031921
R-11260	Leaf	NA	30348604	3.19436	728865426	0.767171	241720529	0.743647	0.0033837
R-11261	Leaf	NA	26134909	2.75084	706116098	0.743226	233076533	0.717054	0.00367892
R-11262	Leaf	NA	37928351	3.99217	749409285	0.788795	249366587	0.76717	0.00336449
R-11263	Leaf	NA	25250958	2.6578	705406758	0.74248	232995142	0.716804	0.00355346
R-11264	Leaf	NA	30808299	3.24274	730942555	0.769357	242711228	0.746695	0.0030846
R-11265	Leaf	NA	21394772	2.25192	676722193	0.712288	222019615	0.683038	0.00332102
R-11266	Leaf	NA	22993640	2.42021	686531616	0.722613	225737349	0.694475	0.00365781
R-11267	Leaf	NA	39746216	4.18351	757854393	0.797684	253273633	0.77919	0.00336637
R-11269	Leaf	NA	21831108	2.29784	680955649	0.716744	223649689	0.688053	0.00379021
R-11270	Leaf	NA	28467055	2.99632	720315437	0.758172	238592490	0.734024	0.00333993
R-11271	Leaf	NA	33806454	3.55832	735766860	0.774435	244294110	0.751565	0.00313731
R-11273	Leaf	NA	28069413	2.95446	713880103	0.751398	235815194	0.72548	0.00295041
R-11274	Leaf	NA	21152147	2.22638	681171013	0.71697	223924827	0.688899	0.00341847
R-11275	Leaf	NA	36019517	3.79125	746224953	0.785443	248718634	0.765177	0.00295465
R-11276	Leaf	NA	41046771	4.3204	762102686	0.802155	255073833	0.784728	0.00296783
R-11277	Leaf	NA	37063781	3.90117	743099929	0.782154	246801602	0.759279	0.00374052
R-11278	Leaf	NA	29322891	3.0864	720773201	0.758654	238832901	0.734764	0.00350018
R-11279	Leaf	NA	35560533	3.74294	742805578	0.781844	246747483	0.759113	0.00369255
R-11280	Leaf	NA	21353277	2.24755	666121050	0.701129	217546437	0.669276	0.00391189
R-11281	Leaf	NA	32365065	3.4066	725571407	0.763704	240042279	0.738484	0.00375733
R-11282	Leaf	NA	26945991	2.83621	712525867	0.749973	235608161	0.724843	0.0032393
R-11283	Leaf	NA	35673670	3.75485	746976866	0.786234	248604195	0.764825	0.00355238

## Sheet: Supplemental Table 2
Supplementary Table 2 - A summary of the RNA-Seq results for each genotype sequenced
Sample	Replicate	Number of reads
LD	1	40060627
LD	2	23375242
LD	3	37255651
LDX	1	40975304
LDX	2	34023583
LDX	3	30675565
R-11268	1	37662088
R-11268	2	31605244
R-11268	3	38192928
R-11272	1	33642248
R-11272	2	32555712
R-11272	3	37439658

## Sheet: Supplementary Table 3
Supplementary Table 3. A list of differentially methylated paralogs and corresponding gene expression levels from the average of triplicated RNA-seq experiments
Paralog A	Paralog B	Paralog A CHG methylation level	Paralog B CHG methylation level	Paralog A expression	Paralog B expression
Glyma12g16390.1	Glyma06g42070.1	0.0044843	0.953846	2.18479e+06	0
Glyma06g10020.1	Glyma04g10020.1	0.00327654	0.927536	1226126	4820.47
Glyma15g07930.1	Glyma13g31410.1	0	0.892857	42965.1	0
Glyma06g11210.1	Glyma04g12090.1	0.0021645	0.873646	601687	0
Glyma08g40840.1	Glyma18g16210.1	0.00323924	0.867257	648987	0
Glyma02g09470.1	Glyma07g26950.1	0.00413525	0.855103	374329	0
Glyma02g12470.1	Glyma01g06530.1	0.00476644	0.845457	16534.3	4883.47
Glyma02g05710.1	Glyma16g24390.1	0.00330033	0.84264	210098	0
Glyma17g38070.1	Glyma14g39970.1	0.00383142	0.834854	263783	0
Glyma20g19920.1	Glyma10g25570.1	0.00343643	0.828358	459.82	0
Glyma04g33290.1	Glyma06g20990.1	0	0.801871	825912	1126816
Glyma02g04820.1	Glyma16g22730.1	0	0.796333	234148	555.257
Glyma20g37940.1	Glyma10g29340.1	0.00425894	0.79021	442291	0
Glyma17g36960.1	Glyma14g08050.1	0.00411523	0.788593	233928	324830
Glyma08g42160.1	Glyma18g12850.1	0.00497925	0.786834	598031	523677
Glyma03g26090.1	Glyma07g13890.1	0.00353607	0.775623	1.42903e+06	23814.6
Glyma20g02460.1	Glyma07g34720.1	0.00330033	0.77287	324022	0
Glyma09g31960.1	Glyma07g09850.1	0.00143781	0.74598	318132	0
Glyma02g38490.1	Glyma14g36590.1	0.00494071	0.738249	64227.3	0
Glyma08g15080.1	Glyma18g35730.1	0.00463679	0.728316	80316	0
Glyma20g01200.1	Glyma07g29650.1	0.00217865	0.719532	250646	391839
Glyma17g16570.1	Glyma05g23760.1	0.00117925	0.703869	804641	2013.68
Glyma02g12210.1	Glyma01g06140.1	0.00321027	0.682146	106645	0
Glyma06g21130.1	Glyma04g33090.1	0.00245902	0.674236	274152	726.4
Glyma10g38840.1	Glyma20g28930.1	0.00362976	0.666766	765653	705360
Glyma16g32260.1	Glyma09g26960.1	0.00332126	0.64673	447128	1170.73
Glyma19g00280.1	Glyma05g08780.1	0.00182815	0.646241	132769	134525
Glyma07g17240.1	Glyma18g41980.1	0.00418911	0.643156	991258	3474.43
Glyma13g07500.1	Glyma19g06020.1	0.0015015	0.638735	176747	118291
Glyma06g42050.1	Glyma12g16400.1	0.00445236	0.638133	1.27047e+06	1273795
Glyma09g41840.1	Glyma20g00600.1	0.0016835	0.614937	3113650	0
Glyma14g13400.1	Glyma17g33120.1	0.00127877	0.612942	65730.7	260814
Glyma19g30460.1	Glyma03g27470.1	0.00332594	0.61166	69161.4	426.083
Glyma11g07940.1	Glyma01g37360.1	0.00323625	0.609314	275430	246711
Glyma08g38970.1	Glyma18g20820.1	0	0.608196	405314	446025
Glyma13g03280.1	Glyma14g23710.1	0.00364964	0.603764	1.27842e+06	123398
Glyma15g01040.1	Glyma13g44230.1	0.0044405	0.603412	997857	920668
Glyma18g51230.1	Glyma08g28200.1	0.00264901	0.598063	257439	0
Glyma18g07880.1	Glyma08g45040.1	0.00287908	0.595238	222541	0
Glyma08g08940.1	Glyma05g26000.1	0.0015015	0.589426	441564	1.12106e+06
Glyma03g02930.1	Glyma01g34270.1	0.0043573	0.588979	763195	620890
Glyma08g45660.1	Glyma18g24290.1	0.00385935	0.575701	3065.34	2113.64
Glyma08g39970.1	Glyma18g18230.1	0.00327869	0.567616	258720	893191
Glyma17g33730.1	Glyma14g12170.1	0.0041841	0.566314	1522.31	0
Glyma14g06870.1	Glyma02g42030.1	0.00407955	0.561765	89658.7	0
Glyma08g06690.1	Glyma07g30580.1	0.00241741	0.55425	2142.8	5211.12
Glyma13g16690.1	Glyma17g06000.1	0.0016835	0.549082	86123.8	343684
Glyma18g40210.1	Glyma07g16190.1	0.00357143	0.547563	330115	0
Glyma18g44020.1	Glyma09g41680.1	0.00466563	0.540408	14827.7	6782.14
Glyma10g08320.1	Glyma13g22010.1	0.00280374	0.539044	71286.2	169435
Glyma19g06160.1	Glyma13g07550.1	0.00449775	0.53468	40413.3	791.038
Glyma09g06790.1	Glyma15g18080.1	0.00221239	0.528539	123421	0
Glyma18g14050.1	Glyma08g41750.1	0.00470746	0.525067	53245.1	385792
Glyma02g38940.1	Glyma14g36990.1	0.00127714	0.524946	1301807	0
Glyma03g37290.1	Glyma19g39880.1	0.000856164	0.523351	6052.97	0
Glyma02g10280.1	Glyma18g52630.1	0.00486449	0.523176	140062	98307
Glyma04g21880.1	Glyma06g23580.1	0.00183824	0.519879	0	341417
Glyma20g32320.1	Glyma10g35230.1	0.0017838	0.515241	709056	956085
Glyma01g37180.1	Glyma11g08100.1	0.00347395	0.507585	367289	395671
Glyma06g47380.1	Glyma04g16180.1	0.00318598	0.504985	233896	367943
Glyma13g39440.1	Glyma12g30870.1	0.00355661	0.495466	9486.89	272687
Glyma11g18620.1	Glyma12g09750.1	0.00225056	0.470871	201602	2906.86
Glyma11g09260.1	Glyma01g36180.1	0.00255102	0.470068	727793	211465
Glyma17g17000.1	Glyma05g23000.1	0.00282805	0.461676	262769	305488
Glyma18g07030.1	Glyma11g27000.1	0.00221484	0.460076	1.25783e+06	1.4028e+06
Glyma15g43210.1	Glyma10g11680.1	0.00251256	0.450426	170649	1025780
Glyma02g11860.1	Glyma01g05540.1	0.00385802	0.449778	38453.4	22970.9
Glyma18g28140.1	Glyma03g19720.1	0.00386598	0.449384	321870	0
Glyma04g41870.1	Glyma06g12930.1	0.00253485	0.446832	539638	458474
Glyma03g35440.1	Glyma19g38070.1	0.00194932	0.439243	273138	627267
Glyma18g17240.1	Glyma08g40380.1	0.00338753	0.435594	613826	844208
Glyma20g22120.1	Glyma10g28100.1	0.00492207	0.435325	55862.3	218425
Glyma05g04620.1	Glyma17g15050.1	0.00280426	0.43267	1198160	1522670
Glyma07g00960.1	Glyma08g20310.1	0.00494234	0.416626	34329	99857.5
Glyma03g38110.1	Glyma19g40710.1	0.00263158	0.413043	1.20223e+06	21636.2
Glyma11g15850.1	Glyma12g07620.1	0.00411039	0.411353	309692	341737
Glyma10g01170.1	Glyma20g21660.1	0.00286041	0.41006	360156	354023
Glyma17g16950.1	Glyma05g23110.1	0.0041365	0.40953	310251	2155.51
Glyma11g05070.1	Glyma01g40220.1	0.00310559	0.409221	181558	243060
Glyma09g00660.1	Glyma15g11530.1	0.00292398	0.408944	177897	477646
Glyma08g46020.1	Glyma18g31550.1	0.00444198	0.408318	644943	493052
Glyma09g41560.1	Glyma18g44120.1	0.00156986	0.404361	307404	744103
Glyma16g33240.1	Glyma09g28440.1	0.00367647	0.404046	361532	776285
Glyma09g31060.1	Glyma07g11180.1	0.00369515	0.398473	290415	434087
Glyma13g29590.1	Glyma15g09420.1	0.00101729	0.395778	192293	14561.4
Glyma19g22710.1	Glyma05g06480.1	0.00439338	0.39449	155814	230394
Glyma11g29630.1	Glyma18g06430.1	0.00320513	0.394332	290837	198341
Glyma15g24350.1	Glyma09g12820.1	0.00366876	0.392851	702620	483927
Glyma04g33280.1	Glyma06g21000.1	0.00205973	0.384963	587203	1195186
Glyma16g29600.1	Glyma09g24110.1	0.00332088	0.375824	225902	330294
Glyma09g01130.1	Glyma15g11950.1	0.00106667	0.375537	323266	204935
Glyma08g14360.1	Glyma05g31170.1	0.00164835	0.37545	152034	137825
Glyma11g09520.1	Glyma01g35840.1	0.00158814	0.372024	230412	152604
Glyma17g13850.1	Glyma05g03270.1	0.00428708	0.369978	294969	312979
Glyma12g04740.1	Glyma11g12540.1	0.00245399	0.367454	246701	369814
Glyma20g37960.1	Glyma10g29320.1	0.00345622	0.366915	295108	235955
Glyma07g18200.1	Glyma18g43060.1	0.00387597	0.363636	33056	0
Glyma14g11280.1	Glyma17g34330.1	0.00472144	0.353933	147966	316139
Glyma20g32010.1	Glyma10g35510.1	0.00230415	0.35368	3795.1	628581
Glyma08g36790.1	Glyma01g23760.1	0.00324807	0.35291	582813	263862
Glyma03g24280.1	Glyma07g12660.1	0.0043239	0.35212	206486	147440
Glyma18g43020.1	Glyma07g18160.1	0.00345508	0.348874	162270	111332
Glyma08g05560.1	Glyma05g34130.1	0.00252313	0.346932	441812	1.31553e+06
Glyma04g02510.1	Glyma06g02550.1	0.00165453	0.345579	600227	458200
Glyma17g11920.1	Glyma13g22960.1	0.00299658	0.345415	113629	55167.7
Glyma15g09170.1	Glyma13g29940.1	0.00413864	0.344249	600650	132416
Glyma17g01270.1	Glyma07g39480.1	0.00470746	0.342481	805239	0
Glyma11g15040.1	Glyma12g07010.1	0.00301318	0.340764	548616	705061
Glyma07g02550.1	Glyma08g23480.1	0.00221484	0.339782	368540	3336.52
Glyma09g02170.1	Glyma15g13090.1	0.00215517	0.339739	243383	306747
Glyma11g14960.1	Glyma12g06920.1	0.00411692	0.33867	799623	993642
Glyma03g30870.1	Glyma19g33690.1	0.00342466	0.33599	64278.2	214369
Glyma13g37120.1	Glyma12g33300.1	0.00352361	0.335479	36238.9	66341.2
Glyma12g05060.1	Glyma11g12930.1	0.00134862	0.331243	4560.12	4991.77
Glyma16g07230.1	Glyma19g23450.1	0	0.328983	630.92	667611
Glyma15g09490.1	Glyma13g29520.1	0.00318907	0.325581	558651	346865
Glyma10g38540.1	Glyma20g29300.1	0	0.320591	4586.6	0
Glyma13g03470.1	Glyma14g23990.1	0.00172117	0.31875	824974	676990
Glyma06g39770.1	Glyma12g22240.1	0.00318302	0.312844	243770	548274
Glyma08g40690.1	Glyma18g16700.1	0.00395517	0.311286	259360	15413.4
Glyma06g10610.1	Glyma04g10740.1	0.00404858	0.309626	1590.57	2168.1
Glyma18g52800.1	Glyma02g10160.1	0.00138889	0.307047	18381.4	0
Glyma16g08320.1	Glyma16g20260.1	0.00305677	0.306537	214925	326810
Glyma13g20050.1	Glyma10g05690.1	0.00351406	0.304659	198486	326280
Glyma05g05440.1	Glyma17g15720.1	0.0045489	0.304063	503783	767382
Glyma05g28620.1	Glyma08g11680.1	0.00464481	0.302321	371629	477968
Glyma06g09980.1	Glyma04g09920.1	0.00118906	0.287349	241837	434234
Glyma11g11050.1	Glyma12g03250.1	0.00488334	0.287106	613221	652278
Glyma02g31280.1	Glyma10g12530.1	0.00136986	0.287041	144735	271338
Glyma04g39340.1	Glyma06g15580.1	0.00360268	0.278644	628596	135873
Glyma08g04480.1	Glyma05g35240.1	0.00469484	0.277706	88558.1	231448
Glyma08g07500.1	Glyma13g08030.1	0.00482094	0.274198	150783	276230
Glyma13g32200.1	Glyma15g07110.1	0	0.274171	987.527	600497
Glyma07g15110.1	Glyma01g00900.1	0	0.273673	1041017	56774.7
Glyma16g24570.1	Glyma02g05880.1	0.00389105	0.272313	183791	240367
Glyma09g31050.1	Glyma07g11200.1	0.00398054	0.267948	216233	49991.3
Glyma04g03030.1	Glyma06g03070.1	0.00489596	0.262758	1.01279e+06	727603
Glyma17g08120.1	Glyma02g36560.1	0.00391581	0.262219	308238	239288
Glyma02g00930.1	Glyma10g27960.1	0.00296384	0.26164	44549.2	217481
Glyma16g33040.1	Glyma09g28210.1	0.00325998	0.256431	219152	417589
Glyma10g39020.1	Glyma20g28810.1	0.00287356	0.254507	247202	823677
Glyma10g43060.1	Glyma20g23890.1	0.00357143	0.253545	192437	113567
Glyma13g44200.1	Glyma15g01080.1	0.002693	0.252592	407996	798198
Glyma20g28210.1	Glyma10g39530.1	0	0.251863	50905.9	117742
Glyma19g03530.1	Glyma13g06080.1	0.00287026	0.251779	210415	113529
Glyma18g07140.1	Glyma11g24410.1	0.000819001	0.251393	366957	387391
Glyma04g09330.1	Glyma06g09480.1	0.00380711	0.248255	118291	8719.92
Glyma10g41560.1	Glyma20g25670.1	0.00363825	0.247492	64354.5	28051.2
Glyma16g34500.1	Glyma09g29960.1	0.00134048	0.247224	642326	350568
Glyma04g07830.1	Glyma06g07900.1	0.00221566	0.246779	182901	633583
Glyma06g18880.1	Glyma04g36040.1	0.00149477	0.239209	1772.97	1791.72
Glyma01g33700.1	Glyma03g03250.1	0.00364964	0.238675	5019.84	132626
Glyma10g08560.1	Glyma13g22220.1	0.0043273	0.238566	148419	33108.9
Glyma10g02090.1	Glyma02g01970.1	0.00359712	0.237013	0	0
Glyma14g06670.1	Glyma02g42230.1	0.00406229	0.234609	260600	95636.3
Glyma13g24410.1	Glyma07g32130.1	0.00331126	0.233266	83603	2276.9
Glyma13g38680.1	Glyma12g31750.1	0.00497512	0.230676	1.9253e+06	1178404
Glyma14g04030.1	Glyma02g44690.1	0.00488998	0.230232	144307	201198
Glyma04g14760.1	Glyma09g34820.1	0.0048909	0.229821	213993	154729
Glyma13g02030.1	Glyma14g34450.1	0.002331	0.229698	260906	289.915
Glyma03g14690.1	Glyma01g27250.1	0.00466356	0.228238	405493	402705
Glyma14g06070.1	Glyma02g42940.1	0.00379147	0.226087	511.918	6722.53
Glyma20g26280.1	Glyma10g41000.1	0.00237906	0.223958	466651	320686
Glyma02g16860.1	Glyma10g02920.1	0.00396152	0.223827	594144	596158
Glyma19g32550.1	Glyma03g29700.1	0.00250627	0.223422	798329	3924.08
Glyma17g09470.1	Glyma05g02440.1	0.00168209	0.220549	134808	3977.2
Glyma08g46900.1	Glyma18g36930.1	0.00294811	0.219551	671311	492494
Glyma11g01040.1	Glyma01g44490.1	0.0038506	0.218993	481713	283102
Glyma15g02100.1	Glyma13g43240.1	0.00429799	0.217364	417048	127071
Glyma07g00290.1	Glyma08g24180.1	0.00353017	0.217144	184531	1184708
Glyma07g07980.1	Glyma03g01560.1	0.00215827	0.216783	20587.9	2591.52
Glyma02g13220.1	Glyma01g07670.1	0.00254005	0.216035	393407	370542
Glyma03g14700.1	Glyma01g27240.1	0.00291687	0.215712	379824	241590
Glyma04g12680.1	Glyma06g47920.1	0.00374037	0.215198	440780	493637
Glyma18g46390.1	Glyma09g39800.1	0.00446429	0.212025	302954	515941
Glyma02g05520.1	Glyma16g23960.1	0.00267142	0.211636	580154	700537
Glyma08g47890.1	Glyma18g53620.1	0.00475059	0.21137	874287	5739.13
Glyma09g32640.1	Glyma01g34780.1	0.00472367	0.208406	430679	521158
Glyma19g01260.1	Glyma13g23850.1	0.00220103	0.207192	505003	304789
Glyma13g40000.1	Glyma12g29790.1	0.00349243	0.206612	365403	229633
Glyma13g32680.1	Glyma15g06650.1	0.00118624	0.205527	1.15419e+06	263188
Glyma03g30900.1	Glyma19g33720.1	0.00286944	0.204341	225686	242200
Glyma03g36520.1	Glyma19g39180.1	0.00118765	0.203911	392622	434473
Glyma09g34550.1	Glyma01g35130.1	0.00304105	0.203327	735112	808555
Glyma06g16420.1	Glyma04g38590.1	0.00466954	0.203264	24338.1	24962.5
Glyma08g43670.1	Glyma18g09490.1	0.00340136	0.201427	115047	672835
Glyma11g11850.1	Glyma12g04130.1	0.000856898	0.200766	230014	87769.9
Glyma20g25980.1	Glyma10g41270.1	0.00491551	0.198527	230405	212639
Glyma10g05100.1	Glyma13g19460.1	0.00361795	0.196915	1.33997e+06	314359
Glyma04g37050.1	Glyma06g17940.1	0.0023678	0.195122	382843	390887
Glyma15g15950.1	Glyma09g04920.1	0.00294985	0.194954	27263.1	35664.3
Glyma04g27580.1	Glyma11g21260.1	0.00271739	0.191617	586668	905434
Glyma17g04920.1	Glyma13g17580.1	0.00374424	0.190574	788629	100184
Glyma13g29250.1	Glyma15g09840.1	0.00455729	0.189567	287970	200966
Glyma06g03310.1	Glyma04g03240.1	0.00187559	0.187542	149473	73687.9
Glyma16g33300.1	Glyma09g28530.1	0.00482601	0.18732	215062	176796
Glyma17g08980.1	Glyma05g07490.1	0.0030003	0.186919	172559	103677
Glyma07g12070.1	Glyma09g30140.1	0.00405562	0.18626	33770.9	42565.6
Glyma16g00210.1	Glyma12g28490.1	0.00297303	0.185133	289575	278212
Glyma18g48760.1	Glyma09g37750.1	0.00237342	0.183962	38334.1	297290
Glyma16g05780.1	Glyma19g26630.1	0.00365327	0.183956	179499	294113
Glyma02g47950.1	Glyma14g00650.1	0.00290698	0.183118	329143	112310
Glyma11g06250.1	Glyma01g39020.1	0.00314607	0.180816	547852	801272
Glyma12g02380.1	Glyma11g10040.1	0.00312012	0.180634	99006.2	485559
Glyma20g32070.1	Glyma10g35450.1	0.00213447	0.178172	395396	508586
Glyma02g16370.1	Glyma10g03460.1	0.00299103	0.177806	732553	451073
Glyma06g00290.1	Glyma04g00240.1	0.00228311	0.177116	1.24678e+06	1328765
Glyma08g09480.1	Glyma05g26510.1	0.00189394	0.176692	1.33434e+06	0
Glyma07g00930.1	Glyma08g20270.1	0.004329	0.176682	257877	369377
Glyma20g39220.1	Glyma10g44450.1	0.00131492	0.173629	3.1538e+06	59550
Glyma08g09780.1	Glyma05g26790.1	0.00320856	0.172532	326425	250822
Glyma13g09270.1	Glyma14g26680.1	0.00278087	0.171029	1596.79	23246.8
Glyma05g31920.1	Glyma08g15220.1	0.00455996	0.170815	442277	154250
Glyma05g31930.1	Glyma08g15230.1	0.00489796	0.169912	350065	499084
Glyma04g43330.1	Glyma06g11340.1	0.00167785	0.169803	219911	312437
Glyma02g12150.1	Glyma01g06060.1	0.000648929	0.169703	115232	274964
Glyma06g09610.1	Glyma04g09510.1	0.00431034	0.168823	25627.1	831027
Glyma09g09840.1	Glyma15g21910.1	0.00252016	0.168769	216633	260961
Glyma12g10810.1	Glyma06g45930.1	0.00258844	0.167987	2.44226e+06	2772260
Glyma14g06120.1	Glyma02g43020.1	0.00376117	0.166313	297613	6328.36
Glyma08g46420.1	Glyma18g35940.1	0.00441745	0.164858	359068	469425
Glyma06g04900.1	Glyma04g04810.1	0.00323434	0.163456	117037	151690
Glyma13g31080.1	Glyma15g08280.1	0.00121114	0.163331	487127	406513
Glyma13g24620.1	Glyma07g31850.1	0.00392927	0.16042	410063	738107
Glyma02g47610.1	Glyma14g01040.1	0.00379363	0.157812	231950	161499
Glyma04g38760.1	Glyma06g16230.1	0	0.1564	5096.43	526315
Glyma19g41160.1	Glyma03g38560.1	0.00436872	0.154023	266536	534736
Glyma13g05920.1	Glyma19g03440.1	0.00410846	0.151548	412443	107399
Glyma02g28630.1	Glyma09g16620.1	0.00437158	0.148596	154583	210568
Glyma17g05780.1	Glyma13g16940.1	0.00338753	0.147013	274417	802390
Glyma03g32630.1	Glyma19g35380.1	0.00278358	0.146991	58633	692315
Glyma07g07350.1	Glyma16g03730.1	0.00169779	0.146628	589489	148786
Glyma07g09990.1	Glyma09g31770.1	0.00390625	0.14415	39541.3	114360
Glyma07g40300.1	Glyma17g00480.1	0.00333751	0.143972	114420	163302
Glyma08g17780.1	Glyma15g41360.1	0.00249169	0.143902	128291	82396
Glyma20g37770.1	Glyma10g29540.1	0.00482426	0.142564	240810	543605
Glyma06g43930.1	Glyma12g14000.1	0.00382226	0.14147	491306	388577
Glyma06g07560.1	Glyma04g07440.1	0	0.141176	672147	193251
Glyma06g02070.1	Glyma04g01970.1	0.00119832	0.140056	287188	337655
Glyma08g11080.1	Glyma05g28090.1	0.00433121	0.138186	85269.2	255867
Glyma05g26450.1	Glyma08g09370.1	0.00428135	0.137748	419844	559227
Glyma03g12460.1	Glyma01g24430.1	0.00328587	0.136992	249735	212401
Glyma13g44010.1	Glyma15g01330.1	0.004329	0.136691	303649	318539
Glyma03g29440.1	Glyma19g32250.1	0.00276498	0.135889	336543	6693.67
Glyma19g34400.1	Glyma03g31560.1	0.00338123	0.135517	19487.8	75101.1
Glyma14g02530.1	Glyma02g46200.1	0.00347675	0.135456	499668	407140
Glyma13g24400.1	Glyma07g32140.1	0.00231214	0.135375	5956.03	3166.68
Glyma03g32440.1	Glyma19g35170.1	0.00131579	0.135274	366868	184773
Glyma20g22850.1	Glyma10g28730.1	0.00166667	0.13388	788552	724026
Glyma02g16850.1	Glyma10g02930.1	0.00468019	0.13339	1.61815e+06	1038980
Glyma14g17650.1	Glyma17g29240.1	0.00374298	0.133294	94808.7	7953.39
Glyma20g27230.1	Glyma10g40180.1	0.00242131	0.1332	179895	124732
Glyma19g35900.1	Glyma03g33180.1	0.00377766	0.133162	682715	1163704
Glyma16g07140.1	Glyma19g23580.1	0.0034188	0.132759	463640	973.913
Glyma08g07480.1	Glyma13g08060.1	0.00437318	0.132099	41253.8	180862
Glyma02g15840.1	Glyma07g32630.1	0.00373909	0.13154	170182	66884.6
Glyma03g34670.1	Glyma19g37340.1	0.00320256	0.131471	75593	287063
Glyma09g34710.1	Glyma01g35280.1	0.00321802	0.131345	455630	583235
Glyma07g01020.1	Glyma08g20410.1	0.0021322	0.130243	835464	370649
Glyma02g45260.1	Glyma14g03510.1	0.00314042	0.129991	525490	75773.2
Glyma06g05860.1	Glyma04g05870.1	0.003861	0.128098	281521	657331
Glyma05g27070.1	Glyma08g10050.1	0.0042898	0.127417	739924	441160
Glyma05g01870.1	Glyma17g10030.1	0.00371402	0.127384	73632.9	57596.9
Glyma06g00320.1	Glyma04g00270.1	0.00468855	0.126223	43290.4	712360
Glyma20g29930.1	Glyma10g37890.1	0.00264317	0.125535	526991	123943
Glyma02g12020.1	Glyma01g05850.1	0.00390117	0.125265	132094	8468.03
Glyma02g09630.1	Glyma10g22680.1	0.00474934	0.124901	250270	189271
Glyma14g36780.1	Glyma02g38590.1	0.00491973	0.124466	53136	70647.9
Glyma12g34000.1	Glyma13g36530.1	0.00370828	0.124064	766453	371463
Glyma13g40510.1	Glyma15g04890.1	0.00282008	0.12372	59135	42243.5
Glyma02g10000.1	Glyma18g52980.1	0.00075358	0.122874	7823.94	451879
Glyma07g33080.1	Glyma02g15380.1	0	0.119948	4399.45	57605.7
Glyma08g02830.1	Glyma05g36730.1	0.0025974	0.119114	14121.5	2032.82
Glyma11g07910.1	Glyma01g37380.1	0.00419385	0.118701	201301	365055
Glyma15g09560.1	Glyma13g29490.1	0.00205339	0.118534	501013	260355
Glyma18g48350.1	Glyma09g38040.1	0.00378501	0.118149	207159	28472.7
Glyma14g33150.1	Glyma13g02780.1	0.00138504	0.117687	452329	279689
Glyma03g01710.1	Glyma07g08140.1	0.00254083	0.116247	640415	36949.2
Glyma08g14130.1	Glyma05g30940.1	0.003125	0.115479	2.26153e+06	4036550
Glyma15g02180.1	Glyma13g43170.1	0.00351582	0.115301	182001	315761
Glyma18g51480.1	Glyma08g28580.1	0.00256575	0.115132	733252	335014
Glyma18g53890.1	Glyma08g47590.1	0.00379507	0.115108	34142.1	27901.9
Glyma05g32900.1	Glyma08g00520.1	0.00342114	0.115091	364503	17096.2
Glyma05g03480.1	Glyma17g14020.1	0.0035447	0.114389	490952	507116
Glyma20g03950.1	Glyma07g35510.1	0.00412159	0.114286	413683	767293
Glyma13g01500.1	Glyma17g07620.1	0.00263574	0.112706	302764	2280.34
Glyma04g36770.1	Glyma06g18170.1	0.00410046	0.110928	422017	49394.6
Glyma05g04960.1	Glyma17g15350.1	0.0031264	0.110855	869342	45922
Glyma10g36720.1	Glyma20g30870.1	0.00320128	0.110852	242269	271341
Glyma15g17580.1	Glyma09g06300.1	0.00143062	0.110839	207710	469159
Glyma16g00440.1	Glyma12g28780.1	0.00466563	0.110378	127147	254352
Glyma02g37680.1	Glyma14g35980.1	0.0042735	0.109641	777742	93680.3
Glyma04g43270.1	Glyma06g11410.1	0.00385071	0.109351	220404	26768.4
Glyma18g08440.1	Glyma08g44250.1	0.0011236	0.107345	12137.5	0
Glyma14g09300.1	Glyma17g35890.1	0.00335345	0.107209	1182610	1246197
Glyma19g31080.1	Glyma03g28360.1	0	0.106436	1.4453e+06	675516
Glyma16g32510.1	Glyma09g27420.1	0.00251636	0.106401	200725	5400.67
Glyma08g18330.1	Glyma15g40740.1	0.00304692	0.105698	285726	262860
Glyma19g35010.1	Glyma03g32260.1	0.00308778	0.105625	482497	45674
Glyma01g01230.1	Glyma16g08430.1	0.00338045	0.104506	114449	140218
Glyma05g30160.1	Glyma08g13320.1	0.00445236	0.103643	339030	846359
Glyma07g38550.1	Glyma17g02160.1	0.00221239	0.103565	472243	211714
Glyma17g06180.1	Glyma13g16490.1	0.00362027	0.103448	447790	6254.17
Glyma07g12750.1	Glyma03g24450.1	0.00144509	0.103198	778.693	4780.28
Glyma12g01630.1	Glyma09g35730.1	0.00282247	0.10257	493520	442837
Glyma17g36470.1	Glyma14g08640.1	0.00177305	0.101408	161478	126031
Glyma09g10450.1	Glyma15g22520.1	0.00472255	0.10129	191897	149242
Glyma18g05220.1	Glyma11g32880.1	0.00233645	0.100817	1717320	2688.34
Glyma08g11850.1	Glyma05g28730.1	0.00296736	0.100712	1.80879e+06	1.05837e+06
Glyma19g33240.1	Glyma03g30320.1	0.0035137	0.100483	319983	417851
Glyma20g32380.1	Glyma10g35180.1	0.00243605	0.0984828	11805.8	349722
Glyma05g02710.1	Glyma17g13410.1	0.00265051	0.0980141	483170	2234.76
Glyma17g05740.1	Glyma13g16980.1	0.00189215	0.0959291	301729	93340.5
Glyma15g03590.1	Glyma13g41830.1	0.00375811	0.0952846	462723	320916
Glyma16g05820.1	Glyma19g26580.1	0.00227531	0.0950447	537264	98496.1
Glyma15g18610.1	Glyma09g07420.1	0	0.0948276	437850	387578
Glyma17g03490.1	Glyma07g37130.1	0.00460224	0.094796	200783	320166
Glyma20g34590.1	Glyma10g33040.1	0.00172414	0.0946828	479196	296773
Glyma07g34520.1	Glyma20g02260.1	0.00117233	0.0945529	22396.7	69158
Glyma08g09050.1	Glyma05g26100.1	0.00349162	0.0942875	459777	468177
Glyma12g27340.1	Glyma06g36150.1	0.00396432	0.0937666	510612	290825
Glyma18g52640.1	Glyma02g10270.1	0.00413565	0.0936556	227939	32397.8
Glyma13g40550.1	Glyma15g04850.1	0.00329539	0.093356	272507	161229
Glyma10g43420.1	Glyma20g23400.1	0.0017762	0.0929054	13387.8	30863.2
Glyma09g05190.1	Glyma15g16510.1	0.0048513	0.0921976	232566	272504
Glyma06g10910.1	Glyma04g11140.1	0.00384123	0.0913738	0	99846.4
Glyma12g13180.1	Glyma06g44540.1	0.0043054	0.0913405	151421	0
Glyma07g01390.1	Glyma08g20770.1	0.00455487	0.089126	51913.4	1.43348e+06
Glyma08g07160.1	Glyma07g30150.1	0.00469729	0.0891003	504322	274582
Glyma18g52990.1	Glyma02g09990.1	0.00310881	0.0876206	292195	339771
Glyma16g03160.1	Glyma07g06570.1	0.00299103	0.08605	903487	624890
Glyma20g19980.1	Glyma10g25630.1	0.00459674	0.0860247	285089	339261
Glyma19g34390.1	Glyma03g31550.1	0.00226142	0.0856134	652084	101356
Glyma13g36770.1	Glyma12g33720.1	0.00258621	0.0854592	756952	335728
Glyma15g04000.1	Glyma13g41400.1	0.00453515	0.0852601	787659	363423
Glyma01g41550.1	Glyma11g03880.1	0.00228137	0.0849331	375635	513802
Glyma11g33320.1	Glyma18g04910.1	0.00405954	0.0847368	425229	264044
Glyma09g32020.1	Glyma07g09790.1	0.00193798	0.0845689	820132	1.05609e+06
Glyma05g01650.1	Glyma17g10240.1	0.00380228	0.0843007	95414	146048
Glyma03g37530.1	Glyma19g40150.1	0.00262812	0.0842956	378212	486906
Glyma20g36330.1	Glyma10g31190.1	0.00185234	0.0841824	316597	422721
Glyma09g40410.1	Glyma18g45440.1	0.00167715	0.084064	77295.5	149225
Glyma13g23420.1	Glyma17g11410.1	0.0037248	0.0833053	136382	191198
Glyma19g40360.1	Glyma03g37760.1	0	0.0832562	0	383154
Glyma11g10810.1	Glyma12g03090.1	0.00320905	0.0832469	163873	118412
Glyma18g03480.1	Glyma11g34840.1	0.0026643	0.0816126	211059	399714
Glyma02g02100.1	Glyma10g02230.1	0.00354052	0.0815584	39385.7	58902.7
Glyma05g36040.1	Glyma08g03580.1	0.00466926	0.0807018	438037	705879
Glyma10g35750.1	Glyma20g31790.1	0.00402414	0.0805417	1.23877e+06	2053110
Glyma10g32560.1	Glyma20g35020.1	0.00453023	0.0795279	437016	108860
Glyma17g32900.1	Glyma14g13790.1	0.00116959	0.0779014	67504.7	78713.8
Glyma03g34400.1	Glyma19g37090.1	0	0.0774628	1799.57	407009
Glyma01g43150.1	Glyma11g02340.1	0.00476569	0.0759816	1.07949e+06	550762
Glyma06g19560.1	Glyma04g35220.1	0.00468384	0.0754148	1.30752e+06	2677.56
Glyma18g53310.1	Glyma08g48210.1	0.0008726	0.0751356	566516	0
Glyma10g43120.1	Glyma20g23790.1	0.00152323	0.0745629	883211	549358
Glyma02g38510.1	Glyma14g36570.1	0.00489876	0.0742723	278608	309665
Glyma12g13300.1	Glyma06g44440.1	0.00258398	0.0742574	3047.95	625.86
Glyma09g00990.1	Glyma15g11840.1	0.00172811	0.0738721	290728	441491
Glyma11g36610.1	Glyma18g00520.1	0.00283822	0.0731544	126598	76157.7
Glyma02g42510.1	Glyma14g06350.1	0.00402955	0.072959	37790.4	65061.4
Glyma10g31970.1	Glyma20g35710.1	0.00438596	0.0725953	130309	241434
Glyma17g34730.1	Glyma14g10790.1	0.0042508	0.0723363	155412	179688
Glyma06g05220.1	Glyma04g05140.1	0.00141143	0.0712074	152652	51172
Glyma11g11460.1	Glyma12g03610.1	0.00192802	0.0711258	1.45721e+06	3.05158e+06
Glyma15g10630.1	Glyma13g28450.1	0.00164609	0.0709174	239200	798700
Glyma14g18500.1	Glyma17g27610.1	0.00283889	0.0704846	170133	126354
Glyma09g32630.1	Glyma01g34770.1	0.00308166	0.0701403	0	2554.58
Glyma01g43190.1	Glyma11g02310.1	0.00352665	0.07008	55467.9	456265
Glyma16g29860.1	Glyma09g24630.1	0.00266667	0.0691613	464775	1007869
Glyma04g02330.1	Glyma06g02380.1	0.00132802	0.0690595	1.15563e+06	239832
Glyma08g14610.1	Glyma05g31380.1	0.00324412	0.0684713	409668	201519
Glyma17g06720.1	Glyma13g00570.1	0.00384246	0.067753	143922	208709
Glyma06g07670.1	Glyma04g07550.1	0.00289296	0.0677146	20140.4	1148.09
Glyma20g31800.1	Glyma10g35730.1	0.00423168	0.0673966	412504	167551
Glyma07g15820.1	Glyma18g39740.1	0.0036448	0.0664955	207679	291141
Glyma08g47940.1	Glyma18g53520.1	0.00275028	0.0664894	573.36	185069
Glyma12g14060.1	Glyma06g43840.1	0.00422589	0.0664349	241632	397652
Glyma04g35070.1	Glyma06g19670.1	0.00220751	0.0660066	32513.3	129423
Glyma17g14130.1	Glyma05g03580.1	0.00186104	0.0658499	42740.2	696982
Glyma11g10470.1	Glyma12g02760.1	0.00328138	0.0655488	80736.5	58897.5
Glyma18g52610.1	Glyma02g10320.1	0.00225904	0.0653218	296441	18054.7
Glyma08g43950.1	Glyma18g08900.1	0.0031679	0.0651396	1222240	1.32639e+06
Glyma08g40020.1	Glyma18g18140.1	0.00362131	0.0648794	437319	455016
Glyma17g04540.1	Glyma13g17990.1	0.00441745	0.0646304	148339	548491
Glyma04g09310.1	Glyma06g09470.1	0.00436137	0.0646214	648838	339677
Glyma08g03940.1	Glyma05g35710.1	0.00106383	0.0644974	2.34167e+06	34902.8
Glyma13g20160.1	Glyma10g05790.1	0.00476644	0.0642202	573660	882794
Glyma14g02780.1	Glyma02g45960.1	0.00443678	0.063798	61237	157636
Glyma07g18260.1	Glyma18g43110.1	0.00166759	0.0636183	348674	394219
Glyma13g40750.1	Glyma15g04690.1	0.00339751	0.063197	49580.9	23333.2
Glyma14g17270.1	Glyma17g29730.1	0.00144196	0.0631333	192681	123316
Glyma02g42810.1	Glyma14g05910.1	0.0031348	0.0626204	487098	499699
Glyma18g04540.1	Glyma11g33660.1	0.00139082	0.0625767	127255	151525
Glyma17g37660.1	Glyma14g40500.1	0.00375	0.0622537	461491	4847.71
Glyma04g06350.1	Glyma06g06400.1	0.00440705	0.0620965	52423.4	85766.6
Glyma12g33820.1	Glyma13g36670.1	0.00445633	0.0619584	151707	203923
Glyma13g17000.1	Glyma17g05720.1	0.00183486	0.0618729	8955.72	2738.48
Glyma08g10410.1	Glyma05g27410.1	0.000967118	0.061828	123868	2934.22
Glyma09g33260.1	Glyma01g02660.1	0.0011534	0.0614308	462590	539407
Glyma12g34240.1	Glyma13g36310.1	0.00095057	0.0611621	135.365	81401.6
Glyma09g32610.1	Glyma01g34740.1	0.00263158	0.0607029	594.12	2165.19
Glyma04g40360.1	Glyma06g14420.1	0.00396197	0.0603805	550439	1.06758e+06
Glyma11g15910.1	Glyma12g07560.1	0.00249626	0.0603604	86423.3	117605
Glyma16g34520.1	Glyma09g29980.1	0.00388224	0.0597451	246609	191831
Glyma10g29180.1	Glyma20g38120.1	0.00109649	0.0595409	895289	202983
Glyma17g14750.1	Glyma05g04290.1	0.00381194	0.0594976	3.84225e+06	2197910
Glyma10g05030.1	Glyma13g19390.1	0.00385505	0.0592959	426227	105198
Glyma07g39990.1	Glyma17g00810.1	0.00425015	0.0592865	10746.3	4155.19
Glyma11g00740.1	Glyma01g44900.1	0.00266312	0.0592851	243384	244404
Glyma19g30290.1	Glyma03g27320.1	0.00282885	0.0588235	598401	0
Glyma14g40570.1	Glyma17g37540.1	0.00409389	0.058619	444553	516870
Glyma05g29070.1	Glyma08g12210.1	0.00443951	0.0585505	102441	672654
Glyma03g26790.1	Glyma07g14410.1	0.00169062	0.0584997	126405	17358.5
Glyma08g03630.1	Glyma05g35990.1	0.00301205	0.0583431	778377	156430
Glyma01g41160.1	Glyma11g04260.1	0	0.0575236	0	438479
Glyma20g22130.1	Glyma10g28110.1	0.00205233	0.0572023	380699	318181
Glyma08g04460.1	Glyma05g35260.1	0.00242365	0.0571061	238787	349515
Glyma02g16650.1	Glyma10g03170.1	0.00317158	0.0570924	12021.4	62643.9
Glyma11g05490.1	Glyma01g39800.1	0.00378967	0.0570265	415682	136674
Glyma12g04100.1	Glyma11g11750.1	0.00348567	0.0569762	716608	803546
Glyma07g00590.1	Glyma08g23820.1	0.00214477	0.0569038	86737.2	97099.6
Glyma10g43130.1	Glyma20g23760.1	0.00430416	0.0568401	710444	1.4947e+06
Glyma06g00800.1	Glyma04g00790.1	0.00217628	0.0562914	790784	0
Glyma07g16760.1	Glyma18g41310.1	0.00166945	0.0555066	6.11671e+06	350277
Glyma17g02370.1	Glyma07g38390.1	0.00340716	0.0551312	885016	243726
Glyma07g08570.1	Glyma03g01960.1	0.00369458	0.0541619	168391	705650
Glyma13g01950.1	Glyma14g34480.1	0.00289184	0.0541344	80097.9	386931
Glyma11g19660.1	Glyma12g08840.1	0.0038305	0.0541198	151252	282113
Glyma08g03780.1	Glyma05g35830.1	0.00320256	0.0540225	240660	106087
Glyma09g02870.1	Glyma15g13830.1	0.00337756	0.0539419	409505	446766
Glyma16g01960.1	Glyma07g05390.1	0	0.0536913	45662.1	631972
Glyma03g22360.1	Glyma16g09440.1	0.00246305	0.0535912	410363	7868.14
Glyma07g15160.1	Glyma01g00860.1	0.00184502	0.0535714	863983	1.06213e+06
Glyma18g06220.1	Glyma11g29920.1	0.0021692	0.0530973	0	792.57
Glyma12g11780.1	Glyma06g45200.1	0.00197726	0.0528914	159016	46632.4
Glyma11g07540.1	Glyma01g37780.1	0.00207612	0.0526005	820112	546993
Glyma02g09030.1	Glyma16g28200.1	0.00381388	0.0518642	441250	172906
Glyma07g36610.1	Glyma17g03990.1	0.00344976	0.0516827	679456	932169
Glyma08g28040.1	Glyma18g51110.1	0.00282805	0.0512682	215672	318607
Glyma08g07740.1	Glyma05g24550.1	0	0.0502152	333633	723218
Glyma20g16430.1	Glyma13g10480.1	0.00302115	0.0502092	278498	297231
Glyma09g41740.1	Glyma20g00790.1	0.00140647	0.0501337	21141.6	3729.1
Glyma10g07710.1	Glyma13g21540.1	0.00338983	0.0497925	205704	62310.1
Glyma10g36140.1	Glyma20g31480.1	0.00292887	0.0495669	75608.5	46897.5
Glyma15g05210.1	Glyma08g19810.1	0.0021978	0.0493697	709335	514616
Glyma11g04290.1	Glyma01g41140.1	0.0034588	0.0493449	121776	109247
Glyma17g16560.1	Glyma05g23770.1	0.00251889	0.0492424	270437	252394
Glyma12g09250.1	Glyma11g19220.1	0.00425671	0.0491228	921511	529121
Glyma13g20240.1	Glyma10g05890.1	0.00446791	0.0491118	198753	160538
Glyma15g05110.1	Glyma08g19920.1	0.0033557	0.0489942	209253	661042
Glyma15g11850.1	Glyma09g01000.1	0.00365631	0.0487677	0	0
Glyma02g12380.1	Glyma01g06300.1	0.00289855	0.0485348	682899	308088
Glyma19g31230.1	Glyma03g28480.1	0.00343137	0.0483627	354136	91589.8
Glyma17g37800.1	Glyma14g40350.1	0.00132275	0.0481928	480032	286592
Glyma04g09660.1	Glyma06g09760.1	0.00321716	0.0480327	332.123	277520
Glyma10g29500.1	Glyma20g37800.1	0.00414079	0.0478088	300260	297040
Glyma18g08200.1	Glyma08g44610.1	0.00340861	0.0472837	192961	243565
Glyma13g32450.1	Glyma15g06880.1	0.00424421	0.0472394	18296.3	8904.34
Glyma01g39810.1	Glyma11g05470.1	0	0.0472103	132777	463017
Glyma15g13220.1	Glyma09g02310.1	0.00424128	0.0470353	852406	207483
Glyma05g15700.1	Glyma17g18510.1	0.00438116	0.0470263	499133	185150
Glyma19g32600.1	Glyma03g29750.1	0.00188442	0.0468479	415645	250943
Glyma15g22050.1	Glyma09g09970.1	0.00416125	0.0467044	102982	42497.9
Glyma07g07200.1	Glyma16g03640.1	0.00459841	0.046673	229034	200079
Glyma10g01950.1	Glyma02g01870.1	0.00277008	0.0463215	41263	509580
Glyma10g27890.1	Glyma02g01000.1	0.00379867	0.0462819	545174	7444.19
Glyma06g08810.1	Glyma04g08710.1	0.00465387	0.0456594	468348	338856
Glyma10g06160.1	Glyma13g20470.1	0.00455581	0.0456274	408974	264341
Glyma06g39760.1	Glyma12g22280.1	0.00438422	0.0454545	71107.2	37410.5
Glyma09g31980.1	Glyma07g09820.1	0.00434311	0.045286	998783	500624
Glyma18g07320.1	Glyma11g26510.1	0.00285249	0.0452436	449672	451980
Glyma16g05410.1	Glyma19g27450.1	0.00435074	0.0451053	291381	171687
Glyma03g00730.1	Glyma19g30000.1	0.00284495	0.0450406	729785	167097
Glyma12g07990.1	Glyma11g15460.1	0.00244499	0.045025	235822	551574
Glyma11g09720.1	Glyma12g02020.1	0.00485044	0.0449981	69217.6	89857.1
Glyma02g37450.1	Glyma14g35720.1	0.00481541	0.044586	94305.6	755627
Glyma07g04550.1	Glyma16g01130.1	0.002218	0.0445205	419136	54502.9
Glyma17g07670.1	Glyma13g01560.1	0.00441393	0.0442566	1.56377e+06	299166
Glyma07g34330.1	Glyma20g02060.1	0.0037154	0.0442514	222755	143043
Glyma20g23660.1	Glyma10g43230.1	0.00267431	0.0441826	78619.2	192934
Glyma11g18070.1	Glyma12g10140.1	0.00242131	0.0441801	19975	70352.8
Glyma15g05260.1	Glyma08g19760.1	0.00363306	0.0440559	98716.1	388231
Glyma20g26040.1	Glyma10g41230.1	0.00171331	0.0439698	1540210	643245
Glyma19g14270.1	Glyma16g07960.1	0.00280636	0.0439252	0	9031.51
Glyma14g36520.1	Glyma02g38380.1	0.00238237	0.0437557	1.35706e+06	75958
Glyma02g42390.1	Glyma14g06530.1	0.00181159	0.0437018	290467	140181
Glyma01g01340.1	Glyma09g34440.1	0.00391773	0.0436992	477943	5596.64
Glyma04g24440.1	Glyma06g29980.1	0.00467602	0.043342	353009	180086
Glyma09g30230.1	Glyma07g11970.1	0.00383562	0.0427258	269665	155727
Glyma11g11440.1	Glyma12g03580.1	0.00375235	0.042618	39278.2	85819.4
Glyma09g06730.1	Glyma15g17970.1	0.00414013	0.0425188	112619	88640.2
Glyma05g35310.1	Glyma08g04420.1	0.00465753	0.042435	190837	305840
Glyma17g06520.1	Glyma13g00420.1	0.00306592	0.0421019	111730	50107.9
Glyma10g08640.1	Glyma02g36330.1	0.00209644	0.0415225	441144	339837
Glyma04g03580.1	Glyma06g03670.1	0.0031506	0.040747	922410	198277
Glyma03g31740.1	Glyma19g34520.1	0.00165017	0.0406452	109972	134234
Glyma01g27840.1	Glyma03g14200.1	0.0030541	0.0406223	667433	48909.5
Glyma16g03470.1	Glyma07g06960.1	0	0.0405063	0	0
Glyma12g26500.1	Glyma06g35680.1	0.00244798	0.0393489	16727.5	319623
Glyma13g07460.1	Glyma19g05900.1	0.00262009	0.0391791	166394	241532
Glyma02g46490.1	Glyma14g02150.1	0.00361555	0.0389723	146410	100053
Glyma15g07820.1	Glyma13g31490.1	0.00389105	0.0389447	104060	67393
Glyma16g03070.1	Glyma07g06460.1	0.00382958	0.038324	85696.1	106189
Glyma07g27950.1	Glyma20g01530.1	0.00293255	0.038	124609	7100.91
Glyma09g34980.1	Glyma01g35430.1	0.0029873	0.0376055	17067.1	0
Glyma10g37390.1	Glyma20g30350.1	0.00337268	0.0375335	317451	30091.3
Glyma07g35160.1	Glyma20g03020.1	0.00312378	0.0373862	879486	903448
Glyma02g00390.1	Glyma10g00450.1	0.00241984	0.0372539	436010	421039
Glyma18g29500.1	Glyma08g38260.1	0.00464396	0.0372093	886664	6408.95
Glyma06g17200.1	Glyma04g37820.1	0.00393391	0.0371397	175225	100944
Glyma13g19250.1	Glyma10g04890.1	0.00326691	0.0369075	210974	127731
Glyma15g12930.1	Glyma09g02030.1	0.00174927	0.036899	965770	349331
Glyma11g19530.1	Glyma12g08950.1	0.00306748	0.036665	39355.4	122403
Glyma13g02740.1	Glyma14g33240.1	0.00396432	0.0365297	1084428	1440.2
Glyma10g39320.1	Glyma20g28630.1	0.00415512	0.0362022	3995.35	193964
Glyma06g06110.1	Glyma04g06110.1	0.00386473	0.0361882	315397	1.00113e+06
Glyma17g12070.1	Glyma13g22760.1	0.00467047	0.0357762	236730	255894
Glyma08g27250.1	Glyma18g50460.1	0.00473684	0.0357345	39171.4	492201
Glyma11g05220.1	Glyma01g40080.1	0.00423566	0.0354365	185780	110274
Glyma11g09110.1	Glyma01g36320.1	0.00289017	0.0349794	142875	185578
Glyma07g37660.1	Glyma17g03000.1	0.00479386	0.0349162	184178	75937.7
Glyma13g23430.1	Glyma17g11390.1	0.00417163	0.0345518	355179	360531
Glyma07g06790.1	Glyma16g03350.1	0.00493421	0.0341105	375566	337248
Glyma10g42900.1	Glyma20g24110.1	0.00445269	0.0340517	243830	125412
Glyma06g33940.1	Glyma12g19050.1	0.00336134	0.0337644	488056	461062
Glyma06g33960.1	Glyma12g19050.1	0.0036036	0.0337644	291571	461062
Glyma02g07720.1	Glyma16g26790.1	0.00289017	0.0337525	69699.7	17917.6
Glyma05g04740.1	Glyma17g15180.1	0.00385274	0.0335113	7935.01	114629
Glyma09g04520.1	Glyma15g15600.1	0.00164745	0.0334262	2.43495e+06	175422
Glyma09g32750.1	Glyma16g21310.1	0.00179211	0.0333966	576254	52353.4
Glyma20g31360.1	Glyma10g36230.1	0.00391236	0.0332278	35050.8	143970
Glyma13g26820.1	Glyma15g37830.1	0.00359263	0.0332073	138733	88597.9
Glyma19g39350.1	Glyma03g36710.1	0	0.0331667	0	1952.65
Glyma04g34900.1	Glyma06g19800.1	0	0.0330759	2994.13	142753
Glyma12g01450.1	Glyma09g35880.1	0.00259235	0.0330396	282174	73653.5
Glyma17g34940.1	Glyma14g10570.1	0	0.0329523	809797	650455
Glyma15g09150.1	Glyma13g29950.1	0	0.0327273	77159.6	85033.5
Glyma11g36810.1	Glyma18g00720.1	0.00373599	0.0326087	812551	848655
Glyma07g36460.1	Glyma17g04140.1	0.00363636	0.0325901	346039	232925
Glyma13g39580.1	Glyma12g30310.1	0.0042735	0.0325779	992691	0
Glyma09g06690.1	Glyma15g17880.1	0.00483793	0.03243	307177	294838
Glyma06g38160.1	Glyma12g23140.1	0.00340136	0.0322887	2975210	99845.3
Glyma16g03980.1	Glyma19g29570.1	0.00203252	0.0322381	245524	135876
Glyma10g30990.1	Glyma20g36480.1	0.00251889	0.0320946	1509950	214794
Glyma11g02900.1	Glyma01g42520.1	0.00331492	0.032022	620656	324119
Glyma20g33790.1	Glyma10g33820.1	0.00475436	0.0317818	283738	270326
Glyma20g26450.1	Glyma10g40860.1	0.00393185	0.0317063	379432	415634
Glyma13g26700.1	Glyma15g37670.1	0.00416435	0.03148	589233	3966.05
Glyma06g12730.1	Glyma04g42060.1	0	0.0314286	0	0
Glyma07g32780.1	Glyma02g15650.1	0.00484352	0.0314272	201561	162515
Glyma07g01040.1	Glyma08g20430.1	0.00324412	0.0313853	43870.3	11138
Glyma02g03810.1	Glyma01g03880.1	0.00191449	0.0313589	39155.1	28626.1
Glyma06g14530.1	Glyma04g40250.1	0.00281294	0.03125	589473	3563.27
Glyma19g33190.1	Glyma03g30270.1	0.00341079	0.0311284	176918	131829
Glyma01g08580.1	Glyma02g13590.1	0.00300687	0.0308458	486051	455701
Glyma08g04260.1	Glyma05g35470.1	0.00339674	0.0306958	626461	846580
Glyma14g03360.1	Glyma02g45450.1	0.00207469	0.0304807	544211	766996
Glyma08g39840.1	Glyma18g18840.1	0.00280449	0.0304709	993092	525.097
Glyma10g00720.1	Glyma02g00640.1	0.00474342	0.0302475	55902.2	16656.6
Glyma02g45780.1	Glyma14g03030.1	0.00422705	0.0301858	669043	141159
Glyma07g10860.1	Glyma09g31240.1	0.00223714	0.0301624	195477	0
Glyma10g40920.1	Glyma20g26380.1	0.00393013	0.0300795	293425	31483.4
Glyma02g15510.1	Glyma07g32990.1	0.0049435	0.030012	41536.2	26179.4
Glyma10g28690.1	Glyma20g22820.1	0.00332226	0.029773	145517	104318
Glyma08g05180.1	Glyma05g34510.1	0.00123609	0.0297619	532308	784914
Glyma01g37550.1	Glyma11g07750.1	0.00269906	0.0297398	6.24324e+06	648298
Glyma11g27900.1	Glyma18g06740.1	0.00442968	0.0297265	379979	83832.7
Glyma13g35460.1	Glyma12g35100.1	0.00211977	0.029549	228878	130957
Glyma16g29330.1	Glyma09g23330.1	0.00240096	0.0292994	914498	1407.39
Glyma10g11580.1	Glyma15g43150.1	0.00377596	0.0290737	347293	640040
Glyma16g34420.1	Glyma09g29880.1	0.00447427	0.0288554	126448	99537.9
Glyma08g11710.1	Glyma05g28630.1	0.0032077	0.0286369	452058	157444
Glyma19g39630.1	Glyma03g36980.1	0	0.0285714	250946	101305
Glyma18g02020.1	Glyma11g38090.1	0.00274348	0.028451	150200	103343
Glyma11g08570.1	Glyma01g36720.1	0.00233645	0.0282575	1888490	650726
Glyma08g22300.1	Glyma07g03760.1	0	0.0282187	554307	7462.05
Glyma14g10520.1	Glyma17g34990.1	0.00297287	0.0279881	452607	423027
Glyma15g10150.1	Glyma13g28890.1	0.00474834	0.027984	795337	102283
Glyma09g04360.1	Glyma15g15390.1	0.00345423	0.0277045	212301	455386
Glyma08g00380.1	Glyma05g32720.1	0.00182815	0.0276618	378683	402354
Glyma02g15680.1	Glyma07g32760.1	0.00330852	0.0276614	113055	591197
Glyma07g38000.1	Glyma17g02700.1	0.00290095	0.0276364	330807	431539
Glyma20g00730.1	Glyma09g41770.1	0.0031746	0.0275058	879109	599789
Glyma15g35760.1	Glyma13g25690.1	0.00355872	0.0274443	228666	404091
Glyma06g02410.1	Glyma04g02370.1	0.00410046	0.0274361	454617	364090
Glyma06g05550.1	Glyma04g05530.1	0.00151172	0.0270655	563883	276606
Glyma12g35520.1	Glyma13g34960.1	0.00190476	0.0268097	219140	1707.41
Glyma08g13310.1	Glyma05g30150.1	0.00398936	0.0267728	160753	239254
Glyma19g29230.1	Glyma16g04160.1	0.00247066	0.0261072	700885	694068
Glyma19g28160.1	Glyma16g05030.1	0	0.025974	83495.9	61252.1
Glyma16g33510.1	Glyma09g28920.1	0.00410798	0.025933	472715	1148560
Glyma08g35460.1	Glyma16g18150.1	0.00417604	0.0255591	319884	442671
Glyma12g01070.1	Glyma09g36260.1	0.00222222	0.025545	5938.8	4558.11
Glyma13g02660.1	Glyma14g33330.1	0	0.0254413	268748	488096
Glyma11g13620.1	Glyma12g05610.1	0	0.0253807	96815.6	116050
Glyma03g39230.1	Glyma19g41790.1	0.00432633	0.0253713	122236	55686.9
Glyma20g22170.1	Glyma10g28180.1	0.00280449	0.025276	391010	346847
Glyma18g46630.1	Glyma09g39610.1	0.00289975	0.0252593	171598	97658.4
Glyma02g07370.1	Glyma16g26360.1	0.00377181	0.0252199	26153.1	31022.3
Glyma03g34080.1	Glyma19g36820.1	0.00292291	0.0251018	85175.5	75957.4
Glyma11g01140.1	Glyma01g44380.1	0.00322061	0.025076	164538	395096

## Sheet: Supplemental Table 4
Supplemental Table 3 - SNP analysis for LD and LDX genomes
Genotype	Total SNPs	Intergenic	Upstream	5' UTR	Start gained	Start lost	CDS	Intron	Non-synonymous	Synonomous	Stop gained	Stop lost	3' UTR	Downstream
LD	758445	576973	21162	2865	411	9	6992	73238	12097	22807	181	26	6991	20575
LDX	881971	687099	21115	2936	432	12	7340	76212	13111	24299	182	36	7339	21456

## Sheet: Supplemental Table 5
Supplementary Table 4 - A summary of CG-DMRs, their methylation levels in each genotype and their segregation patterns
Note: the coordinate is 0-base and the start and end positions are inclusive
N/D = Not detectable
Chromosome	Start	End	Size	Genotype in R-11268	Methylation Pattern Segregation in R-11268	Genotype in R-11272	Methylation Pattern Segregation in R-11272
1	155536	156113	579	LD	LD	LDX	LDX
1	261268	262054	788	LD	LD	LDX	LDX
1	394257	394489	234	LD	LD	LDX	LDX
1	398528	398831	305	LD	LD	LDX	LD
1	443204	444193	991	LD	LD	LDX	LDX
1	488058	488476	420	LD	LDX	LDX	LDX
1	670429	670664	237	LD	LD	LDX	LDX
1	739969	739986	19	LD	LD	LDX	LDX
1	843863	844329	468	LD	LD	LDX	LDX
1	913741	913947	208	LD	LD	LDX	LDX
1	1005257	1005690	435	LD	LD	LDX	LDX
1	1048632	1049748	1118	LD	LD	LDX	LDX
1	1059518	1060237	721	LD	LD	LDX	LDX
1	1066889	1066976	89	LD	LD	LDX	LDX
1	1077773	1078084	313	LD	LD	LDX	LDX
1	1264610	1264886	278	LD	LD	LDX	No association detected
1	1520876	1521628	754	LD	LD	LDX	LDX
1	1558628	1558948	322	LD	LD	LDX	LDX
1	1829247	1829901	656	LD	No association detected	LDX	LDX
1	2003417	2005315	1900	LD	LD	LDX	LDX
1	2005941	2006001	62	LD	LD	LDX	LDX
1	2146759	2148232	1475	LD	LD	LDX	LDX
1	2170803	2171666	865	LD	LD	LDX	LDX
1	2284151	2284687	538	LD	LD	LDX	LDX
1	2519651	2520173	524	LD	LD	LDX	LDX
1	2687224	2687435	213	LD	LD	LDX	LDX
1	2780070	2780613	545	LD	N/D	LDX	N/D
1	2786950	2787064	116	LD	LD	LDX	LDX
1	2849152	2849419	269	LD	LDX	LDX	LDX
1	2914997	2915487	492	LD	LD	LDX	LDX
1	3050630	3050928	300	Heterozygous	LD	LDX	LDX
1	3664482	3664534	54	Heterozygous	LDX	LDX	LDX
1	3786595	3788681	2088	Heterozygous	LDX	LDX	LDX
1	3882129	3882201	74	Heterozygous	N/D	LDX	N/D
1	4024350	4024500	152	Heterozygous	LDX	LDX	LDX
1	4072255	4072722	469	Heterozygous	LDX	LDX	LDX
1	4077189	4077522	335	Heterozygous	No association detected	LDX	LDX
1	4082667	4082998	333	Heterozygous	LDX	LDX	No association detected
1	4284235	4284836	603	Heterozygous	No association detected	LDX	LDX
1	4336805	4336910	107	Heterozygous	No association detected	LDX	LDX
1	4338894	4339184	292	Heterozygous	LDX	LDX	LDX
1	4377954	4378221	269	Heterozygous	No association detected	LDX	LDX
1	5375279	5375996	719	Heterozygous	LDX	N/D	No association detected
1	5455646	5455876	232	Heterozygous	No association detected	N/D	LD
1	5597488	5597552	66	Heterozygous	No association detected	N/D	No association detected
1	5973773	5974114	343	Heterozygous	LDX	N/D	LD
1	6080526	6080926	402	Heterozygous	LDX	N/D	LD
1	6301768	6301820	54	Heterozygous	LDX	N/D	No association detected
1	7089866	7090395	531	Heterozygous	LDX	LD	LD
1	7615948	7616817	871	Heterozygous	LDX	LD	LD
1	7659755	7660196	443	Heterozygous	No association detected	LD	LD
1	7666840	7666953	115	Heterozygous	No association detected	LD	LD
1	7793000	7793382	384	Heterozygous	LDX	LD	LDX
1	8024332	8024466	136	Heterozygous	LD	Heterozygous	LD
1	8329606	8330567	963	Heterozygous	LD	Heterozygous	LD
1	8517113	8517416	305	Heterozygous	LDX	Heterozygous	No association detected
1	8575830	8576132	304	Heterozygous	No association detected	Heterozygous	No association detected
1	8728123	8728481	360	Heterozygous	LDX	Heterozygous	LD
1	9022861	9023038	179	Heterozygous	No association detected	LD	LD
1	9621395	9622250	857	Heterozygous	No association detected	LD	LD
1	11135219	11135355	138	LDX	LDX	Heterozygous	LD
1	11697023	11697119	98	LDX	No association detected	Heterozygous	LD
1	16748377	16748841	466	LDX	No association detected	Heterozygous	LD
1	16829708	16830180	474	LDX	LDX	Heterozygous	LD
1	18024639	18025086	449	N/D	LD	Heterozygous	LD
1	21011430	21011655	227	Heterozygous	LDX	LD	LD
1	21481964	21482117	155	Heterozygous	LDX	LD	LD
1	21690128	21690255	129	Heterozygous	No association detected	LD	LD
1	22095016	22095185	171	Heterozygous	LDX	N/D	LD
1	22683713	22683747	36	Heterozygous	LDX	N/D	LDX
1	24225473	24225847	376	Heterozygous	No association detected	N/D	LD
1	24227496	24227760	266	Heterozygous	No association detected	N/D	LD
1	26529103	26529297	196	Heterozygous	No association detected	N/D	LD
1	27038312	27038473	163	Heterozygous	No association detected	Heterozygous	LD
1	27108450	27108735	287	Heterozygous	No association detected	Heterozygous	LD
1	27665082	27665300	220	Heterozygous	LDX	Heterozygous	LD
1	28022552	28022864	314	Heterozygous	LDX	Heterozygous	LD
1	28900153	28900850	699	Heterozygous	LDX	Heterozygous	LD
1	28994396	28994687	293	Heterozygous	LDX	Heterozygous	LD
1	29372972	29373546	576	Heterozygous	LD	Heterozygous	LD
1	30118256	30118916	662	Heterozygous	LDX	N/D	LD
1	31256656	31256879	225	Heterozygous	No association detected	N/D	LD
1	31706491	31706511	22	Heterozygous	LD	N/D	No association detected
1	31738779	31739284	507	Heterozygous	No association detected	N/D	LD
1	31947709	31948238	531	Heterozygous	LDX	N/D	LD
1	32224686	32224770	86	Heterozygous	No association detected	N/D	LD
1	33044957	33045085	130	Heterozygous	No association detected	N/D	LD
1	33126312	33126938	628	Heterozygous	LDX	N/D	LD
1	33400908	33401159	253	Heterozygous	LDX	N/D	LDX
1	33810985	33811049	66	Heterozygous	LDX	N/D	LD
1	33894255	33895337	1084	Heterozygous	LDX	N/D	LD
1	33899626	33899813	189	Heterozygous	No association detected	N/D	LD
1	34149380	34149528	150	Heterozygous	No association detected	N/D	LD
1	34828363	34828453	92	Heterozygous	LDX	N/D	No association detected
1	34834948	34835305	359	Heterozygous	LDX	N/D	LD
1	35187930	35189231	1303	Heterozygous	LDX	N/D	LD
1	35327558	35327880	324	Heterozygous	No association detected	N/D	LD
1	36723662	36724467	807	Heterozygous	No association detected	LD	LD
1	37095681	37095718	39	Heterozygous	No association detected	LD	No association detected
1	37300323	37300646	325	Heterozygous	LDX	LD	No association detected
1	37402829	37403433	606	Heterozygous	No association detected	LD	LD
1	37586633	37586670	39	Heterozygous	No association detected	LD	LD
1	37593777	37593929	154	Heterozygous	No association detected	LD	No association detected
1	38071879	38072009	132	Heterozygous	No association detected	LD	LD
1	38587344	38587840	498	Heterozygous	LDX	LD	LD
1	38620723	38620800	79	Heterozygous	No association detected	LD	LD
1	38799560	38799950	392	Heterozygous	No association detected	LD	LD
1	38926054	38926217	165	Heterozygous	No association detected	LD	LD
1	38975301	38976545	1246	Heterozygous	No association detected	LD	LD
1	39525760	39526616	858	Heterozygous	LDX	LD	LD
1	39530567	39530758	193	Heterozygous	No association detected	LD	LD
1	39531328	39531522	196	Heterozygous	No association detected	LD	LD
1	39850402	39850608	208	Heterozygous	LD	LD	LD
1	39928716	39929391	677	Heterozygous	LDX	LD	LD
1	40968427	40969456	1031	Heterozygous	LDX	Heterozygous	LD
1	41197859	41198155	298	Heterozygous	No association detected	Heterozygous	LD
1	41992968	41993028	62	Heterozygous	LDX	Heterozygous	LD
1	42072789	42073320	533	Heterozygous	LDX	Heterozygous	LD
1	42734806	42734998	194	Heterozygous	No association detected	Heterozygous	LD
1	42761601	42761963	364	Heterozygous	LDX	Heterozygous	LDX
1	42762017	42762219	204	Heterozygous	LDX	Heterozygous	LD
1	43248263	43248361	100	Heterozygous	LDX	Heterozygous	LD
1	43265002	43265047	47	Heterozygous	No association detected	Heterozygous	LD
1	43416364	43416599	237	Heterozygous	LDX	Heterozygous	LD
1	44410869	44411054	187	Heterozygous	No association detected	LD	LD
1	44732710	44732879	171	Heterozygous	No association detected	LD	LD
1	44779664	44780037	375	Heterozygous	LDX	LD	LD
1	45785235	45785477	244	N/D	LDX	LD	LD
1	45963181	45963422	243	N/D	No association detected	LD	LD
1	46157527	46157650	125	N/D	LDX	LD	LD
1	46321654	46321949	297	N/D	LDX	LD	LD
1	46468039	46468247	210	N/D	No association detected	LD	LD
1	46527131	46527285	156	N/D	No association detected	LD	LD
1	46528817	46528953	138	N/D	No association detected	LD	LD
1	47898412	47898794	384	LDX	LDX	LD	LD
1	47944582	47944664	84	LDX	LDX	LD	No association detected
1	48557647	48558294	649	Heterozygous	LDX	LD	LDX
1	48635629	48635698	71	Heterozygous	LDX	LD	No association detected
1	48713756	48714215	461	Heterozygous	LDX	LD	LD
1	48783058	48783210	154	Heterozygous	No association detected	LD	LD
1	49126138	49126325	189	LD	LD	LD	LD
1	49314674	49315193	521	LD	LD	LD	LD
1	49323363	49323648	287	LD	LD	LD	LD
1	49403245	49403281	38	LD	LD	LD	LD
1	49845591	49846600	1011	LD	LD	LD	LD
1	50565689	50566451	764	LD	LD	LD	LD
1	50642131	50643231	1102	LD	LD	LD	LD
1	50748940	50749982	1044	LD	No association detected	LD	LD
1	50981672	50982162	492	LD	LD	LD	No association detected
1	50984540	50984867	329	LD	No association detected	LD	No association detected
1	50985089	50986297	1210	LD	No association detected	LD	No association detected
1	51165690	51165950	262	LD	LD	LD	LD
1	51371413	51371713	302	LD	LD	LD	LD
1	52611697	52611892	197	Heterozygous	LD	LD	LD
1	52671562	52672386	826	Heterozygous	LDX	LD	LD
1	53053042	53053254	214	LDX	LDX	LD	LD
1	53470002	53470265	265	LDX	LDX	LD	No association detected
1	53739844	53740020	178	LDX	No association detected	LD	LD
1	53954433	53954750	319	LDX	LD	LD	LD
1	54218445	54218572	129	LDX	LDX	LD	LD
1	54288051	54288186	137	LDX	LD	LD	LD
1	54394902	54395420	520	LDX	No association detected	LD	LD
1	54395972	54397305	1335	LDX	No association detected	LD	LD
1	54743088	54743120	34	LDX	LD	LD	No association detected
1	55476386	55476425	41	LD	No association detected	LD	LD
1	55605292	55605441	151	LD	LDX	LD	LD
1	55833583	55833854	273	LD	LDX	LD	No association detected
2	3289	3702	415	LDX	LDX	LDX	LDX
2	183277	183341	66	LDX	No association detected	LDX	No association detected
2	600374	600488	116	LDX	LDX	LDX	LDX
2	798983	799276	295	LDX	LDX	LDX	LDX
2	1040105	1040176	73	LDX	LDX	LDX	LDX
2	1049956	1050915	961	LDX	No association detected	LDX	No association detected
2	1159491	1159648	159	LDX	LDX	LDX	LDX
2	1324489	1324827	340	LDX	N/D	LDX	N/D
2	1372734	1373772	1040	LDX	LDX	LDX	LDX
2	1739481	1739848	369	LDX	No association detected	LDX	LDX
2	1832760	1833266	508	LDX	LDX	LDX	LDX
2	2363456	2363734	280	LD	LD	LDX	LDX
2	2379993	2380071	80	LD	LD	LDX	LDX
2	2634457	2634790	335	LD	LD	LDX	LDX
2	2639534	2639735	203	LD	LD	LDX	LDX
2	2640046	2640856	812	LD	LD	LDX	LDX
2	2641000	2641179	181	LD	LD	LDX	LDX
2	2643703	2644114	413	LD	LD	LDX	LDX
2	2718335	2718537	204	LD	LD	LDX	LDX
2	3051609	3051736	129	LD	LD	LDX	LDX
2	3186424	3186689	267	LD	LD	LDX	LDX
2	3284095	3284174	81	LD	LD	LDX	LDX
2	3395478	3395886	410	LD	LD	LDX	LDX
2	3397991	3398154	165	LD	LD	LDX	LDX
2	3470872	3471427	557	LD	LD	LDX	LDX
2	3497810	3497990	182	LD	LD	LDX	LDX
2	3807880	3807938	60	LD	N/D	LDX	LDX
2	3823427	3824531	1106	LD	LD	LDX	LDX
2	3898167	3898363	198	LD	LD	LDX	LDX
2	4028003	4028364	363	LD	LD	LDX	LDX
2	4102121	4102512	393	LD	LD	LDX	LDX
2	4450650	4450717	69	LD	LD	LDX	LDX
2	4492868	4493103	237	LD	No association detected	LDX	LD
2	4942092	4942124	34	LD	LD	LDX	LDX
2	5084815	5084874	61	LD	LD	LDX	LDX
2	5192310	5192846	538	LD	LD	LDX	LDX
2	5316105	5316530	427	LD	LD	LDX	LDX
2	5561399	5561813	416	LD	LD	LDX	LDX
2	5567993	5568269	278	LD	LD	LDX	LDX
2	5575422	5576080	660	LD	LD	LDX	No association detected
2	5762380	5762617	239	LD	LD	LDX	LDX
2	5773915	5773931	18	LD	LD	LDX	LDX
2	5847057	5847132	77	LD	LD	LDX	LDX
2	6090914	6091444	532	LD	LD	Heterozygous	LDX
2	6224299	6224699	402	LD	LD	Heterozygous	LDX
2	6340542	6340828	288	LD	LD	Heterozygous	LDX
2	6408703	6408819	118	LD	LD	Heterozygous	LDX
2	6814171	6814419	250	LD	LD	Heterozygous	LD
2	7025935	7026138	205	LD	LD	LD	LD
2	7302323	7302724	403	LD	LD	LD	LD
2	7303670	7304590	922	LD	LD	LD	LD
2	7342488	7342669	183	LD	LD	LD	LD
2	7425704	7425801	99	LD	LD	LD	LD
2	7451874	7452832	960	LD	LD	LD	LD
2	7453946	7454145	201	LD	LD	LD	LD
2	7740778	7741184	408	LD	LDX	LD	LDX
2	8188632	8188739	109	LD	LD	LD	LD
2	8201707	8202237	532	LD	No association detected	LD	LD
2	8474052	8474856	806	LD	LD	LD	LD
2	8612012	8612207	197	LD	LD	LD	LD
2	9122621	9122982	363	LD	LD	LD	No association detected
2	9175419	9175935	518	LD	LD	LD	LD
2	9267208	9267938	732	LD	LD	LD	LD
2	9268096	9268372	278	LD	LD	LD	LD
2	9302645	9303621	978	LD	LD	LD	LD
2	9344879	9345749	872	LD	LD	LD	LD
2	9368495	9368916	423	LD	LD	LD	LD
2	9383275	9384166	893	LD	LD	LD	LD
2	9430693	9431267	576	LD	LD	LD	LD
2	9535246	9535414	170	LD	LD	LD	LD
2	9536127	9536244	119	LD	LD	LD	LD
2	9697700	9697875	177	LD	LD	LD	LD
2	9747225	9747744	521	LD	LD	LD	LD
2	9878362	9878548	188	LD	LD	LD	LD
2	10173377	10173440	65	LD	LD	LD	LD
2	10250437	10250468	33	LD	LD	LD	LD
2	10633920	10636776	2858	LD	LD	LD	LD
2	10716926	10716960	36	LD	LD	LD	LD
2	10766606	10767262	658	LD	No association detected	LD	LD
2	10966915	10967347	434	LD	LD	LD	LD
2	11518628	11518950	324	LD	LD	LD	LD
2	11674813	11674862	51	LD	LD	LD	No association detected
2	12394042	12394276	236	LD	No association detected	LD	LD
2	12684937	12685270	335	LD	No association detected	LD	LD
2	12723167	12723557	392	LD	No association detected	LD	LD
2	13120976	13121820	846	LDX	LDX	LD	LD
2	13539578	13539907	331	LDX	No association detected	LD	LD
2	13589927	13590486	561	LDX	No association detected	LD	LD
2	13628159	13628902	745	LDX	LDX	LD	LD
2	13701635	13701979	346	LDX	No association detected	LD	LD
2	13928245	13928318	75	LDX	No association detected	LD	LD
2	14086731	14087548	819	Heterozygous	LDX	LD	LD
2	14177390	14177719	331	Heterozygous	No association detected	LD	LD
2	14195643	14195803	162	Heterozygous	No association detected	LD	LD
2	14330960	14331857	899	Heterozygous	LDX	LD	LD
2	14369131	14369674	545	Heterozygous	LD	LD	LD
2	14401309	14402593	1286	Heterozygous	No association detected	LD	LD
2	14459641	14459933	294	Heterozygous	LD	LD	LD
2	14462474	14462658	186	Heterozygous	LD	LD	LD
2	14469371	14469617	248	Heterozygous	LD	LD	LD
2	14723644	14723786	144	Heterozygous	LD	LD	LD
2	15260962	15261301	341	LD	LD	LD	LD
2	15645091	15646112	1023	LD	LD	LD	LD
2	15673405	15674317	914	LD	LD	LD	LD
2	16584476	16584668	194	LD	No association detected	LD	LD
2	16844860	16845404	546	LD	LD	LD	LD
2	17023829	17024060	233	LD	LD	LD	LD
2	18014900	18015572	674	LD	LD	LD	LD
2	18909096	18909287	193	LD	LD	LD	LD
2	21790707	21791401	696	LD	LD	LD	LD
2	22618868	22619723	857	Heterozygous	LDX	LD	LD
2	22693154	22693461	309	Heterozygous	LD	LD	LD
2	22696617	22696990	375	Heterozygous	LDX	LD	LD
2	22715616	22716539	925	Heterozygous	LD	LD	LD
2	25955380	25955413	35	LD	LDX	LD	LD
2	26070401	26070682	283	LD	LD	Heterozygous	No association detected
2	27759029	27759628	601	LD	LD	LD	LD
2	28075411	28075465	56	LD	No association detected	LD	No association detected
2	28089374	28089964	592	LD	LD	LD	LD
2	28484095	28484596	503	LD	LD	LD	LD
2	28642501	28642676	177	LD	LD	LD	LD
2	29252866	29252977	113	LD	LD	LD	LD
2	30142723	30142840	119	LD	LD	LD	LD
2	30267773	30268674	903	LD	LD	LD	LD
2	30269235	30270188	955	LD	LD	LD	LD
2	30505987	30506195	210	LD	LD	LD	LD
2	30746044	30746418	376	LD	LD	LD	LD
2	30818483	30818962	481	LD	LD	LD	LD
2	30994362	30995230	870	LD	LD	LD	LD
2	31698479	31699026	549	Heterozygous	LD	Heterozygous	LD
2	32248812	32249413	603	N/D	LD	N/D	LD
2	32491349	32491597	250	N/D	LD	N/D	LD
2	32492221	32492488	269	N/D	LD	N/D	LD
2	32790625	32790816	193	N/D	LD	N/D	LD
2	32815832	32815978	148	N/D	LD	N/D	LD
2	33252402	33252476	76	LD	LD	LD	LD
2	33753858	33754700	844	LD	LD	LD	LD
2	34033368	34033542	176	LD	LD	LD	LD
2	34035224	34035616	394	LD	LD	LD	LD
2	36010831	36011528	699	LD	LD	LD	LD
2	36015722	36016620	900	LD	LD	LD	LD
2	36547904	36548181	279	LD	LD	LD	LD
2	36615115	36615498	385	LD	No association detected	LD	No association detected
2	36702667	36702849	184	LD	LD	LD	LD
2	36958980	36959461	483	LD	LD	LD	LD
2	37422395	37423419	1026	LD	LD	LD	LD
2	37563167	37563928	763	LD	LD	LD	LD
2	38054884	38055065	183	LD	No association detected	LD	No association detected
2	38142529	38142610	83	LD	LD	LD	LD
2	38320136	38320241	107	LD	LD	LD	LD
2	38343410	38343505	97	LD	LD	LD	LD
2	38630891	38631089	200	LD	LD	LD	No association detected
2	38844411	38844859	450	LD	No association detected	LD	No association detected
2	39024909	39025319	412	LD	LD	LD	LD
2	39526091	39526401	312	LD	LD	LD	LD
2	39599483	39600214	733	LD	LD	LD	LD
2	39720452	39722093	1643	LD	LD	LD	LD
2	39992377	39992847	472	LD	LD	LD	LD
2	40098322	40098924	604	LD	LD	LD	LD
2	40345382	40345521	141	LD	LD	LD	LD
2	40486781	40486817	38	LD	No association detected	LD	No association detected
2	40552166	40552378	214	LD	LD	LD	LD
2	40743119	40743301	184	LD	LD	LD	LD
2	41215853	41216571	720	LD	LD	Heterozygous	LD
2	41419787	41419972	187	LD	LD	Heterozygous	LD
2	41786525	41787629	1106	LD	No association detected	Heterozygous	No association detected
2	41788055	41788082	29	LD	LD	Heterozygous	LD
2	41810403	41810983	582	LD	LD	Heterozygous	LDX
2	41981910	41982574	666	LD	LD	Heterozygous	No association detected
2	42038149	42039082	935	LD	No association detected	LD	LDX
2	42964144	42964251	109	LD	LD	LD	No association detected
2	43191074	43191100	28	LD	LD	Heterozygous	No association detected
2	43197879	43198140	263	LD	LDX	Heterozygous	No association detected
2	43227070	43227610	542	LD	LD	Heterozygous	No association detected
2	43300928	43301563	637	LD	LD	Heterozygous	No association detected
2	43311633	43312506	875	LD	LD	Heterozygous	No association detected
2	43404311	43404545	236	LD	LD	Heterozygous	LDX
2	43409510	43409980	472	LD	No association detected	Heterozygous	LD
2	43524048	43524649	603	LD	LD	Heterozygous	LDX
2	43709410	43710170	762	LD	LD	Heterozygous	No association detected
2	43807944	43808201	259	LD	LD	Heterozygous	No association detected
2	43826520	43826602	84	LD	LDX	Heterozygous	LDX
2	43905151	43906095	946	LD	LD	Heterozygous	No association detected
2	43926088	43927074	988	LD	LD	Heterozygous	LD
2	43953494	43953877	385	LD	LD	Heterozygous	LD
2	43979767	43980442	677	LD	LD	Heterozygous	LD
2	44069886	44070499	615	Heterozygous	LD	Heterozygous	No association detected
2	44115860	44116187	329	Heterozygous	LD	Heterozygous	No association detected
2	44173753	44174482	731	Heterozygous	LDX	Heterozygous	LDX
2	44559417	44560357	942	Heterozygous	LDX	Heterozygous	LDX
2	44562816	44563233	419	Heterozygous	No association detected	Heterozygous	No association detected
2	44615172	44615351	181	Heterozygous	LDX	Heterozygous	No association detected
2	44985279	44985549	272	Heterozygous	LDX	Heterozygous	LDX
2	45310487	45310889	404	LDX	No association detected	Heterozygous	No association detected
2	46098583	46098923	342	LDX	LDX	Heterozygous	LD
2	46165091	46165467	378	LDX	No association detected	Heterozygous	No association detected
2	46214367	46214665	300	LDX	LDX	Heterozygous	LD
2	46256767	46257282	517	LDX	No association detected	Heterozygous	LD
2	46394532	46394956	426	LDX	No association detected	Heterozygous	No association detected
2	46858390	46858606	218	LDX	LDX	Heterozygous	No association detected
2	47308443	47308495	54	LDX	LDX	LDX	LD
2	47522593	47522906	315	LDX	LDX	LDX	No association detected
2	48370766	48371023	259	LDX	LD	LDX	No association detected
2	48663385	48664046	663	LDX	LDX	LDX	LDX
2	48704717	48705553	838	LDX	LDX	LDX	LDX
2	48913259	48913614	357	LDX	LDX	LDX	LDX
2	48990316	48990864	550	LDX	LDX	LDX	LDX
2	49016183	49017396	1215	LDX	LDX	LDX	LDX
2	49093689	49094232	545	LDX	LDX	LDX	LDX
2	49347682	49348331	651	LDX	LDX	LDX	LDX
2	49365804	49365876	74	LDX	LDX	LDX	LDX
2	49401893	49403977	2086	LDX	LDX	LDX	LDX
2	49592774	49593160	388	LDX	LDX	LDX	LDX
2	49669198	49669349	153	LDX	LDX	LDX	LDX
2	49673228	49673618	392	LDX	LDX	LDX	LDX
2	49790373	49791218	847	LDX	LDX	LDX	LDX
2	49858438	49858720	284	LDX	LDX	LDX	LDX
2	49926670	49927140	472	LDX	LDX	LDX	LDX
2	50112221	50112738	519	LDX	LDX	LDX	LDX
2	50113848	50114201	355	LDX	LDX	LDX	LDX
2	50156708	50157440	734	LDX	LDX	LDX	LDX
2	50236708	50237659	953	LDX	LDX	LDX	LDX
2	50639586	50640051	467	LDX	LDX	LDX	LDX
2	50663662	50664181	521	LDX	LDX	LDX	LDX
2	50826005	50826317	314	LDX	LDX	LDX	LDX
2	51592830	51593314	486	N/D	LDX	N/D	LDX
3	56798	57128	332	Heterozygous	No association detected	LDX	LDX
3	117081	117369	290	Heterozygous	No association detected	LDX	LDX
3	260377	261828	1453	Heterozygous	LD	LDX	LDX
3	272151	272713	564	Heterozygous	No association detected	LDX	LDX
3	289940	290513	575	Heterozygous	No association detected	LDX	LDX
3	300135	300319	186	Heterozygous	LD	LDX	LDX
3	302131	302705	576	Heterozygous	LD	LDX	LDX
3	690590	690984	396	Heterozygous	LDX	LDX	LDX
3	847694	847780	88	Heterozygous	No association detected	LDX	LDX
3	1000630	1000650	22	LD	LDX	LDX	LDX
3	1269108	1269392	286	LD	No association detected	LDX	LDX
3	1427526	1427730	206	LD	No association detected	LDX	LDX
3	2597612	2597916	306	N/D	No association detected	N/D	No association detected
3	2717493	2718177	686	N/D	No association detected	N/D	No association detected
3	2846032	2846147	117	N/D	LD	N/D	LD
3	2903390	2903558	170	N/D	LDX	N/D	LDX
3	3076237	3077457	1222	Heterozygous	No association detected	LD	LD
3	3110293	3110705	414	Heterozygous	LDX	LD	LD
3	3296403	3296490	89	Heterozygous	No association detected	LD	LD
3	3498273	3498396	125	Heterozygous	LDX	LD	N/D
3	3499838	3500985	1149	Heterozygous	No association detected	LD	LD
3	3773054	3773257	205	Heterozygous	LDX	LD	LDX
3	3923972	3924296	326	Heterozygous	No association detected	LD	LD
3	3997949	3998716	769	Heterozygous	LDX	LD	LD
3	3999327	3999583	258	Heterozygous	LDX	LD	LD
3	4052853	4053047	196	Heterozygous	No association detected	LD	LD
3	4057099	4057380	283	Heterozygous	No association detected	LD	LD
3	4059058	4059268	212	Heterozygous	LDX	LD	LD
3	4467342	4468104	764	Heterozygous	LD	LD	LD
3	4474524	4474795	273	Heterozygous	No association detected	LD	LD
3	4529536	4530109	575	Heterozygous	No association detected	LD	LD
3	4656181	4657332	1153	Heterozygous	No association detected	LD	LD
3	4665448	4666219	773	Heterozygous	LD	LD	No association detected
3	4758727	4758781	56	Heterozygous	No association detected	LD	LD
3	4782007	4782179	174	Heterozygous	LDX	LD	LD
3	4904617	4905454	839	Heterozygous	No association detected	LD	LD
3	5019435	5020557	1124	Heterozygous	LDX	LD	LD
3	5141635	5142046	413	Heterozygous	No association detected	LD	LD
3	5335083	5335259	178	Heterozygous	LDX	LD	LD
3	6452241	6453226	987	LDX	LDX	LD	No association detected
3	6712843	6713340	499	LDX	LDX	LD	LD
3	6976407	6977776	1371	LDX	No association detected	LD	LD
3	7024217	7025199	984	Heterozygous	No association detected	LD	LD
3	7043020	7044395	1377	Heterozygous	No association detected	LD	LD
3	7046524	7046700	178	Heterozygous	No association detected	LD	LD
3	7139675	7140984	1311	Heterozygous	No association detected	LD	LD
3	7145372	7145716	346	Heterozygous	No association detected	LD	LD
3	7197303	7198357	1056	Heterozygous	LDX	LD	LD
3	7199926	7200577	653	Heterozygous	No association detected	LD	LD
3	7201336	7202331	997	Heterozygous	LD	LD	LD
3	7218812	7219482	672	Heterozygous	No association detected	LD	LD
3	7785796	7786846	1052	Heterozygous	LDX	LD	LD
3	8112320	8112378	60	Heterozygous	LDX	LD	LD
3	8248252	8248822	572	Heterozygous	No association detected	LD	LD
3	8677704	8678249	547	Heterozygous	No association detected	LD	LD
3	9529006	9529383	379	Heterozygous	No association detected	LD	LD
3	9529892	9530020	130	Heterozygous	No association detected	LD	LD
3	9663559	9663758	201	Heterozygous	N/D	LD	N/D
3	9792309	9792360	53	Heterozygous	No association detected	LD	LD
3	9892610	9892759	151	Heterozygous	No association detected	LD	LD
3	11272079	11272707	630	LDX	No association detected	LD	LD
3	11853251	11854019	770	LDX	No association detected	LD	LD
3	11940839	11941366	529	LDX	No association detected	LD	LD
3	11949512	11949779	269	LDX	LDX	LD	LD
3	12624533	12624633	102	LDX	No association detected	LD	LD
3	13925421	13926193	774	LDX	No association detected	LD	LD
3	14389229	14389510	283	Heterozygous	No association detected	LD	LD
3	15379792	15379856	66	LDX	N/D	LD	N/D
3	18367185	18367281	98	LD	No association detected	LD	LD
3	18589379	18589420	43	LD	LD	LD	LD
3	18625463	18625534	73	LD	LD	LD	LD
3	18755150	18755631	483	LD	LD	LD	LD
3	19070890	19071560	672	Heterozygous	LD	LD	LD
3	19081773	19082158	387	Heterozygous	LD	LD	LD
3	21956387	21956840	455	Heterozygous	LDX	LD	LD
3	22116898	22116924	28	Heterozygous	No association detected	Heterozygous	LD
3	22599894	22600400	508	Heterozygous	No association detected	Heterozygous	No association detected
3	22754794	22755612	820	Heterozygous	No association detected	Heterozygous	LD
3	22776519	22776673	156	Heterozygous	LDX	Heterozygous	LD
3	23812315	23812419	106	Heterozygous	No association detected	Heterozygous	No association detected
3	23822940	23823189	251	Heterozygous	No association detected	Heterozygous	LDX
3	23930529	23930588	61	Heterozygous	LD	Heterozygous	No association detected
3	23957130	23957524	396	Heterozygous	LD	Heterozygous	LD
3	24786967	24786996	31	LD	LD	Heterozygous	LD
3	25327708	25327895	189	Heterozygous	LD	Heterozygous	LD
3	25415383	25415973	592	Heterozygous	LD	Heterozygous	LD
3	25849483	25849992	511	Heterozygous	LD	Heterozygous	LD
3	26453913	26454176	265	LD	No association detected	Heterozygous	No association detected
3	26768192	26768273	83	LD	No association detected	Heterozygous	No association detected
3	26776382	26776682	302	LD	LD	Heterozygous	LD
3	27176541	27176571	32	LD	LDX	Heterozygous	LDX
3	27258255	27258946	693	LD	LD	Heterozygous	LD
3	27539489	27540291	804	LD	LD	Heterozygous	LD
3	27988122	27988453	333	LD	LD	Heterozygous	LD
3	28665017	28665045	30	LD	LD	N/D	LD
3	28688826	28688950	126	LD	LD	N/D	LD
3	28915156	28915454	300	LD	No association detected	N/D	No association detected
3	29057342	29057437	97	LD	No association detected	N/D	LD
3	29870929	29871174	247	LD	LD	N/D	LD
3	30491542	30491728	188	LD	LD	LD	LD
3	30492304	30492341	39	LD	LD	LD	LD
3	30554243	30554456	215	LD	No association detected	LD	LD
3	30584509	30584526	19	LD	LD	LD	LD
3	30907663	30908206	545	LD	LD	LD	LD
3	30974075	30974441	368	LD	No association detected	LD	No association detected
3	31861612	31861672	62	Heterozygous	LDX	LD	LD
3	32264353	32264773	422	N/D	No association detected	LD	No association detected
3	32266331	32266395	66	N/D	LDX	LD	LD
3	32534213	32534394	183	N/D	LDX	LD	LD
3	32722390	32722533	145	N/D	LDX	LD	LD
3	32750203	32750739	538	N/D	LDX	LD	LD
3	33458652	33458799	149	N/D	LDX	LD	LD
3	33819372	33819692	322	N/D	LDX	LD	LD
3	34099683	34100474	793	N/D	LDX	LD	LD
3	34136898	34137773	877	N/D	LDX	LD	LD
3	34214430	34214452	24	N/D	LDX	LD	LD
3	34349730	34349853	125	N/D	LDX	LD	No association detected
3	34473745	34474347	604	N/D	LDX	LD	LD
3	34523904	34526015	2113	N/D	LDX	LD	No association detected
3	34687032	34687162	132	N/D	LDX	LD	LD
3	34885969	34886228	261	N/D	LDX	LD	LD
3	35096032	35096426	396	LDX	LDX	LD	LD
3	35111208	35111483	277	LDX	LDX	LD	LD
3	35304049	35304287	240	LDX	LDX	LD	LD
3	35461054	35461256	204	LDX	LDX	LD	LD
3	35922275	35922960	687	LDX	LDX	LD	LD
3	36193242	36193899	659	LDX	LDX	LD	LD
3	37082146	37082260	116	LDX	LDX	N/D	LD
3	37663803	37664518	717	LDX	LD	N/D	LD
3	38789632	38789812	182	LDX	LDX	N/D	LDX
3	39970081	39970310	231	LDX	LDX	N/D	LDX
3	40540728	40540737	11	LDX	LDX	LDX	LDX
3	40598624	40599639	1017	LDX	No association detected	LDX	LDX
3	40767145	40767279	136	LDX	No association detected	LDX	LDX
3	40767329	40767603	276	LDX	No association detected	LDX	LDX
3	40771200	40771594	396	LDX	LD	LDX	LDX
3	41094329	41095128	801	Heterozygous	LD	LDX	LDX
3	41114166	41114578	414	Heterozygous	LDX	LDX	No association detected
3	41351088	41351408	322	Heterozygous	No association detected	LDX	No association detected
3	41388840	41389738	900	Heterozygous	LDX	LDX	LDX
3	41657921	41658424	505	Heterozygous	No association detected	LDX	LDX
3	42140162	42140995	835	N/D	LD	N/D	LD
3	43122440	43123283	845	LDX	No association detected	LD	LD
3	43410724	43410976	254	LDX	LDX	LD	LDX
3	43654919	43656051	1134	LDX	LDX	LD	LD
3	43713634	43714390	758	LDX	LDX	LD	LD
3	44053827	44053867	42	LDX	LDX	LD	No association detected
3	44127726	44127958	234	LDX	No association detected	LD	LD
3	44305820	44306055	237	LDX	No association detected	LD	LD
3	44668446	44669020	576	LDX	No association detected	LD	LD
3	44669035	44669113	80	LDX	LDX	LD	LD
3	44859921	44860664	745	LDX	No association detected	LD	LD
3	44927163	44928071	910	LDX	No association detected	LD	LD
3	45033561	45033631	72	LDX	No association detected	LD	LD
3	45073263	45073701	440	LDX	No association detected	LD	LD
3	45107252	45107788	538	LDX	LD	LD	LD
3	45152067	45152984	919	LDX	No association detected	LD	LD
3	45360192	45360473	283	LDX	LD	LD	LD
3	45428837	45429169	334	LDX	LDX	LD	LDX
3	45760769	45761246	479	LDX	LDX	LD	LD
3	45977527	45977910	385	LDX	LDX	LD	LD
3	46133703	46134279	578	LDX	LDX	LD	LD
3	46240552	46240960	410	LDX	LDX	LD	LD
3	46457882	46458340	460	LDX	LDX	LD	No association detected
3	46546972	46547546	576	LDX	LDX	LD	LD
3	46602027	46603091	1066	LDX	LDX	LD	LD
3	47091807	47091961	156	N/D	LDX	N/D	LD
3	47710634	47710775	143	N/D	LDX	N/D	No association detected
4	586062	586622	562	LD	LD	LDX	LDX
4	717475	717617	144	LD	LD	LDX	No association detected
4	990774	991493	721	LD	LD	LDX	LDX
4	1013702	1015735	2035	LD	LD	LDX	LDX
4	1018995	1019270	277	LD	LD	LDX	LDX
4	1055517	1056233	718	LD	LD	LDX	LDX
4	1200702	1201487	787	LD	LD	LDX	LDX
4	1253969	1254937	970	LD	LD	LDX	LDX
4	1382855	1382989	136	LD	LD	LDX	LDX
4	1644751	1645341	592	LD	LD	LDX	LDX
4	1777810	1777971	163	LD	LD	LDX	LDX
4	2070073	2071130	1059	LD	LD	LDX	LDX
4	2432883	2433665	784	LD	LD	LDX	LDX
4	2496146	2496783	639	LD	LD	LDX	LDX
4	2571268	2572082	816	LD	LD	LDX	LDX
4	2761583	2761629	48	LD	No association detected	LDX	LD
4	2937201	2937676	477	LD	LD	LDX	LDX
4	3462231	3462268	39	LD	N/D	LDX	N/D
4	3541197	3541783	588	LD	LD	LDX	LDX
4	3613518	3614352	836	LD	LD	LDX	LDX
4	4321606	4322000	396	LD	No association detected	LDX	LDX
4	4342063	4342472	411	LD	LD	LDX	LDX
4	4409513	4409715	204	LD	LD	LDX	LDX
4	4410405	4410799	396	LD	LD	LDX	LDX
4	4470399	4470659	262	LD	LD	LDX	LDX
4	4528834	4529664	832	LD	LD	LDX	No association detected
4	4603567	4603862	297	LD	LD	LDX	No association detected
4	5621590	5622072	484	Heterozygous	LD	LDX	LDX
4	5772398	5772459	63	Heterozygous	LD	LDX	LDX
4	6774222	6774969	749	LDX	No association detected	LDX	LD
4	6841434	6841894	462	LDX	No association detected	LDX	LDX
4	7438052	7438179	129	LDX	No association detected	LDX	No association detected
4	7673318	7673420	104	LDX	LDX	LDX	LDX
4	7768856	7769281	427	LDX	LDX	LDX	LDX
4	8534851	8535150	301	LD	LD	LD	No association detected
4	8919487	8920698	1213	LD	LD	LD	LD
4	8950810	8951392	584	LD	LD	LD	LD
4	9129192	9129286	96	LD	LDX	LD	LDX
4	9135619	9135959	342	LD	LD	LD	LD
4	9196070	9196508	440	LD	LD	LD	LD
4	9203691	9204226	537	LD	LD	LD	No association detected
4	9293759	9293937	180	LD	LD	LD	LD
4	9836169	9836661	494	LD	LD	LD	LD
4	9837330	9837706	378	LD	LD	LD	LD
4	9997750	9998270	522	LD	LD	LD	LD
4	10089716	10089945	231	LD	LD	LD	LD
4	10093828	10094390	564	LD	LD	LD	No association detected
4	10096843	10097111	270	LD	LD	LD	LD
4	10425656	10425851	197	LD	LD	LD	LDX
4	10774717	10775406	691	LD	LD	LD	LD
4	11100147	11101595	1450	LD	LD	LD	LD
4	11236008	11236343	337	LD	LD	LD	LD
4	11537890	11538239	351	LD	LD	LD	LD
4	11711324	11711811	489	LD	LD	LD	LD
4	11727387	11727614	229	LD	LD	LD	LD
4	11734280	11734429	151	LD	LD	LD	LD
4	11935912	11936361	451	LD	LD	LD	LD
4	12072187	12072225	40	LD	No association detected	LD	LDX
4	12648758	12648835	79	LD	LDX	LD	LDX
4	12700285	12700604	321	LD	LD	LD	LD
4	13018148	13018282	136	LD	LD	LD	LD
4	13419241	13419508	269	LD	LD	LD	LD
4	13716751	13718114	1365	LD	LD	LD	LD
4	14153835	14154116	283	LD	LD	LD	LD
4	14216420	14216641	223	LD	LD	LD	LD
4	14639610	14640129	521	LD	LD	LD	LD
4	14911151	14911893	744	LD	LD	LD	LD
4	14918959	14919151	194	LD	LD	LD	LD
4	14920691	14921492	803	LD	LD	LD	LD
4	15223967	15224441	476	LD	LD	LD	LD
4	15683348	15683471	125	LD	N/D	LD	N/D
4	15689514	15690061	549	LD	LD	LD	LD
4	16662205	16662245	42	LD	LD	LD	No association detected
4	16770011	16770256	247	LD	LD	LD	LD
4	16941779	16942390	613	LD	LD	LD	LD
4	16943521	16943831	312	LD	LD	LD	LD
4	17028979	17029266	289	LD	LD	LD	LD
4	17077422	17077797	377	LD	No association detected	LD	No association detected
4	17110252	17110542	292	LD	LD	LD	LD
4	17205871	17206153	284	LD	LD	LD	LD
4	17666554	17668515	1963	LD	LD	LD	LD
4	17829167	17829461	296	LD	LD	LD	LD
4	17901929	17902230	303	LD	No association detected	LD	LDX
4	17994749	17995775	1028	LD	LD	LD	LD
4	18381694	18381907	215	LD	LD	LD	LD
4	19208879	19209292	415	LD	LD	LD	LD
4	19441534	19442023	491	LD	LD	LD	LD
4	19892996	19893021	27	LD	No association detected	LD	No association detected
4	20741067	20741289	224	LD	LD	LD	LD
4	20866544	20867007	465	LD	No association detected	LD	LD
4	22358141	22358464	325	LD	LD	LD	LD
4	22373747	22373809	64	LD	LD	LD	LD
4	25205652	25206292	642	LD	LD	LD	LD
4	25209821	25210177	358	LD	LD	LD	LD
4	25216472	25217075	605	LD	No association detected	LD	LD
4	25937420	25937445	27	LD	LD	LD	No association detected
4	27464134	27465482	1350	LD	LD	LD	LD
4	27849050	27849380	332	LD	LD	LD	LD
4	28027385	28028370	987	LD	LD	LD	LD
4	28052319	28052814	497	LD	LD	LD	LD
4	28094350	28094806	458	LD	LD	LD	No association detected
4	28139519	28139558	41	LD	No association detected	LD	LDX
4	28646633	28646756	125	LD	LD	LD	LD
4	30124085	30124420	337	LD	LD	LD	LD
4	30739586	30740731	1147	LD	LD	LD	LD
4	30745619	30745664	47	LD	No association detected	LD	No association detected
4	31043912	31044069	159	LD	LD	LD	LD
4	31047448	31047923	477	LD	LD	LD	LD
4	31663394	31663759	367	LD	LD	LD	LD
4	31726705	31727113	410	LD	LD	LD	LD
4	31750757	31752918	2163	LD	LD	LD	LD
4	31938207	31938647	442	LD	LD	LD	LD
4	33128572	33128846	276	LD	LD	LD	LD
4	33304782	33305827	1047	LD	LD	LD	LD
4	34332004	34332410	408	Heterozygous	LD	Heterozygous	No association detected
4	34594915	34595432	519	Heterozygous	LD	Heterozygous	LD
4	36455313	36455475	164	LD	LD	LD	LD
4	36455657	36455866	211	LD	No association detected	LD	LD
4	36687332	36687812	482	LD	LD	LD	LD
4	36729734	36729809	77	LD	No association detected	LD	No association detected
4	36772095	36772588	495	LD	LD	LD	LD
4	36788919	36789069	152	LD	LD	LD	LD
4	36792078	36792206	130	LD	LD	LD	LD
4	36830359	36831005	648	LD	LD	LD	LD
4	37131692	37132211	521	LD	LD	LD	LD
4	37761269	37761396	129	LD	LD	LD	LD
4	38104301	38104541	242	LD	LD	LD	LD
4	38769726	38770306	582	LD	LD	LD	No association detected
4	39013381	39014399	1020	LD	LD	LD	LD
4	39235180	39235619	441	LD	LD	LD	LD
4	39252751	39252841	92	LD	LDX	LD	LDX
4	39828852	39830053	1203	LD	LD	LD	LD
4	40594082	40594135	55	LD	LD	LD	LD
4	40635317	40635626	311	LD	No association detected	LD	LD
4	40793940	40794083	145	LD	LD	LD	LD
4	41247983	41248481	500	LD	LD	LD	LD
4	41810292	41811447	1157	LD	LD	LD	LD
4	41853580	41854763	1185	LD	LD	LD	LD
4	41872448	41872945	499	LD	LD	LD	LD
4	41934215	41934654	441	LD	LD	LD	LD
4	42149174	42150023	851	LD	LD	LD	LD
4	42351345	42352298	955	LD	LD	LD	LD
4	42375265	42375535	272	LD	LD	LD	LD
4	43116933	43117114	183	LD	LD	LD	LD
4	43243358	43243478	122	LD	LD	LD	LD
4	43540481	43540898	419	LD	LD	LD	LD
4	43696264	43697359	1097	LD	LD	LD	LD
4	44329410	44329547	139	LD	LDX	LD	LDX
4	44389929	44390037	110	LD	LD	LD	LD
4	44430098	44430598	502	LD	LD	LD	LD
4	45394554	45394939	387	LDX	LDX	LD	LD
4	45553907	45554915	1010	LDX	LDX	LD	LD
4	45856616	45856672	58	LDX	LDX	LD	LD
4	45937144	45937305	163	LDX	LDX	LD	LDX
4	45975778	45975833	57	LDX	LDX	LD	LD
4	46108625	46108818	195	LDX	No association detected	LD	LD
4	46391531	46392074	545	LDX	LDX	LD	No association detected
4	46410867	46411387	522	LDX	LDX	LD	LD
4	46546349	46546686	339	LDX	LDX	LD	LD
4	46832793	46833342	551	LDX	LDX	LD	LD
4	46846675	46847063	390	LDX	LDX	LD	No association detected
4	47025912	47025980	70	LDX	No association detected	LD	LD
4	47141107	47141828	723	LDX	LDX	LD	LD
4	47217973	47218293	322	LDX	LDX	LD	LD
4	47247571	47247636	67	LDX	LDX	LD	LD
4	47418475	47418524	51	LDX	LDX	LD	LD
4	47419894	47420100	208	LDX	No association detected	LD	LD
4	48000014	48000767	755	N/D	LDX	N/D	LDX
4	48308095	48308252	159	N/D	LDX	N/D	LDX
4	48358620	48359421	803	N/D	LDX	N/D	No association detected
4	48478292	48478581	291	N/D	LDX	N/D	LD
4	48546964	48547515	553	N/D	LDX	N/D	LDX
4	48795907	48796542	637	N/D	LDX	N/D	LDX
4	48820824	48821454	632	N/D	LDX	N/D	LDX
4	48864950	48865205	257	N/D	LDX	N/D	LD
4	48949423	48949798	377	N/D	LDX	N/D	LDX
4	49021105	49021624	521	N/D	LDX	N/D	LDX
4	49031068	49031355	289	N/D	LDX	N/D	LDX
4	49090093	49090195	104	N/D	LDX	N/D	LDX
4	49140386	49140879	495	N/D	No association detected	N/D	No association detected
4	49227691	49228069	380	N/D	No association detected	N/D	LDX
5	64178	65296	1120	LD	LD	LDX	LDX
5	66142	66741	601	LD	LD	LDX	LDX
5	131538	131839	303	LD	No association detected	LDX	LDX
5	183670	183820	152	LD	LD	LDX	LDX
5	502958	503379	423	LD	LD	LDX	LDX
5	1053391	1053650	261	LD	LD	LDX	LDX
5	1653849	1654038	191	LD	LD	LDX	No association detected
5	1970628	1971033	407	LD	LD	LDX	LDX
5	2292215	2292542	329	LD	LD	LDX	LDX
5	2424098	2424275	179	LD	No association detected	LDX	No association detected
5	3626150	3626310	162	LD	LD	LDX	LD
5	3794945	3795180	237	LD	LD	LDX	LDX
5	4046507	4047044	539	LD	LD	LDX	LDX
5	4065569	4065811	244	LD	LD	LDX	LDX
5	4317394	4317670	278	LD	LD	LDX	LDX
5	4788700	4788894	196	LD	No association detected	LDX	LDX
5	5101245	5101644	401	LD	No association detected	LDX	LDX
5	5217160	5217209	51	LD	LD	LDX	No association detected
5	5355696	5356534	840	LD	LD	LDX	LDX
5	5766450	5767062	614	LD	LD	LDX	LDX
5	6024179	6024786	609	LD	LD	LDX	LDX
5	6329911	6330461	552	LD	LD	LDX	LDX
5	6745035	6745071	38	LD	LD	LDX	No association detected
5	6781718	6782095	379	LD	LD	LDX	LDX
5	7578622	7579155	535	LD	LD	LDX	LDX
5	7752846	7753672	828	LD	LD	LDX	LDX
5	7778267	7778326	61	LD	LD	LDX	LDX
5	7907232	7907671	441	LD	LD	LDX	LDX
5	8213008	8213036	30	Heterozygous	LD	LDX	LDX
5	8286057	8286198	143	Heterozygous	LD	LDX	LDX
5	8659186	8660084	900	Heterozygous	LDX	LDX	LDX
5	8684031	8684120	91	Heterozygous	LDX	LDX	LDX
5	8916446	8916969	525	Heterozygous	LDX	LDX	LDX
5	8979467	8979526	61	Heterozygous	LDX	LDX	LDX
5	9003319	9003902	585	LD	LDX	LDX	LDX
5	11322778	11323107	331	LD	LD	N/D	LDX
5	13202384	13203080	698	LD	LD	N/D	No association detected
5	14157377	14157424	49	LD	LD	LDX	LDX
5	14476584	14477961	1379	LD	LD	LDX	LDX
5	14943400	14943541	143	LD	LD	LDX	LDX
5	15478622	15478670	50	LD	LD	Heterozygous	LDX
5	15957529	15957661	134	LD	LDX	Heterozygous	LDX
5	15992560	15992841	283	LD	LD	Heterozygous	LDX
5	17430278	17430423	147	Heterozygous	LD	Heterozygous	LD
5	19837434	19837831	399	LD	LD	LDX	LDX
5	21553126	21553458	334	LD	LD	LDX	LD
5	21816808	21817026	220	LD	LD	LDX	LDX
5	24577673	24577909	238	Heterozygous	LD	LDX	LDX
5	24598325	24598427	104	Heterozygous	No association detected	LDX	LDX
5	25738660	25738719	61	LD	LD	N/D	LDX
5	26742130	26742421	293	Heterozygous	LD	Heterozygous	LDX
5	27352610	27353164	556	N/D	LD	N/D	LDX
5	27535792	27535950	160	N/D	LD	N/D	LDX
5	28226358	28226603	247	LD	LD	LDX	LDX
5	28746143	28746200	59	LD	LD	LDX	No association detected
5	29385599	29385802	205	LD	LD	LDX	LDX
5	29569402	29569930	530	LD	LD	LDX	LDX
5	29940643	29940952	311	LD	LD	LDX	No association detected
5	30125156	30125530	376	LD	LD	LDX	No association detected
5	30597127	30598054	929	LD	LD	LDX	LDX
5	30981276	30981464	190	LD	N/D	LDX	LDX
5	31061339	31063334	1997	LD	LD	LDX	LDX
5	31468542	31468919	379	LD	LD	LDX	No association detected
5	32050898	32051348	452	LD	LD	Heterozygous	LD
5	32368346	32368748	404	LD	LD	Heterozygous	LDX
5	32685076	32685529	455	LD	LD	Heterozygous	No association detected
5	32978261	32979177	918	LD	LD	Heterozygous	LD
5	34516529	34516706	179	LDX	LD	LDX	LDX
5	34564512	34564622	112	LDX	LD	LDX	No association detected
5	35507125	35507164	41	LD	LD	LD	LD
5	35574482	35574615	135	LD	LDX	LD	LDX
5	35616403	35617350	949	LD	LD	LD	LD
5	35653593	35654404	813	LD	LD	LD	LD
5	35707905	35709133	1230	LD	LD	LD	LD
5	35840999	35841326	329	LD	LD	LD	LD
5	35880573	35880769	198	LD	LD	LD	LD
5	35886716	35886879	165	LD	LD	LD	LD
5	35898071	35898462	393	LD	No association detected	LD	No association detected
5	36265740	36266404	666	LD	LD	Heterozygous	No association detected
5	36550242	36550880	640	LD	LD	Heterozygous	LDX
5	36724650	36724800	152	LD	LD	Heterozygous	LD
5	36728234	36728660	428	LD	LD	Heterozygous	LD
5	37169121	37169332	213	Heterozygous	No association detected	Heterozygous	LD
5	37576196	37576912	718	Heterozygous	LDX	Heterozygous	LDX
5	37736557	37737160	605	Heterozygous	LD	Heterozygous	LD
5	37968918	37969375	459	Heterozygous	LDX	Heterozygous	No association detected
5	38115964	38116810	848	LD	LD	LDX	LDX
5	38360213	38360251	40	LD	LD	LDX	LDX
5	38688347	38688893	548	LD	LD	LDX	LDX
5	38710381	38711610	1231	LD	LD	LDX	LDX
5	38726385	38727259	876	LD	LD	LDX	LDX
5	38885016	38885125	111	LD	LD	LDX	LDX
5	38893529	38893972	445	LD	LD	LDX	LDX
5	38926225	38926238	15	LD	LD	LDX	LDX
5	39005967	39006466	501	LD	LD	LDX	LDX
5	39097605	39098206	603	LD	LD	LDX	No association detected
5	39124684	39125186	504	LD	LD	LDX	LDX
5	39274066	39274430	366	LD	LD	LDX	LDX
5	39346094	39346565	473	LD	LD	LDX	LDX
5	39379668	39380741	1075	LD	LD	LDX	LDX
5	39381376	39383101	1727	LD	LD	LDX	LDX
5	40054064	40054549	487	LD	LD	LDX	LDX
5	40185592	40186208	618	LD	LD	LDX	LDX
5	40291946	40292543	599	LD	LD	LDX	LDX
5	40323809	40324002	195	LD	No association detected	LDX	LD
5	40398096	40398300	206	LD	LD	LDX	LDX
5	40433641	40433830	191	LD	LD	LDX	LDX
5	40731746	40731882	138	LD	LD	LDX	LDX
5	40817121	40817173	54	LD	LD	LDX	LDX
5	40824202	40824779	579	LD	No association detected	LDX	LDX
5	41169873	41170569	698	LDX	LD	LDX	LDX
5	41211256	41211316	62	LDX	LD	LDX	LDX
5	41218129	41218812	685	LDX	LD	LDX	LDX
5	41485788	41486165	379	LDX	LD	LDX	LDX
6	8381	8904	525	LD	LD	LDX	No association detected
6	120365	120773	410	LD	LD	LDX	No association detected
6	130755	130933	180	LD	LD	LDX	No association detected
6	131472	132822	1352	LD	LD	LDX	No association detected
6	600787	601300	515	LD	LD	LDX	LDX
6	637334	637814	482	LD	No association detected	LDX	LD
6	755481	755777	298	LD	LD	LDX	No association detected
6	762295	762724	431	LD	LD	LDX	No association detected
6	937696	937934	240	LD	LD	LDX	No association detected
6	1206190	1206488	300	LD	LDX	Heterozygous	LDX
6	1261471	1262162	693	LD	LD	Heterozygous	LDX
6	1488080	1488332	254	LD	LD	Heterozygous	No association detected
6	1569501	1570133	634	LD	LD	Heterozygous	LDX
6	1708497	1708949	454	LD	LD	Heterozygous	LDX
6	1916864	1917279	417	LD	LD	Heterozygous	No association detected
6	1966379	1966584	207	LD	LD	Heterozygous	LDX
6	2309797	2309819	24	LDX	LDX	LDX	LDX
6	2759150	2759293	145	LDX	LDX	LDX	No association detected
6	2912815	2912924	111	LDX	LDX	LDX	LDX
6	3206693	3206820	129	N/D	No association detected	N/D	LDX
6	3599944	3600601	659	N/D	LDX	N/D	LDX
6	3904273	3904479	208	N/D	LDX	N/D	LDX
6	4067713	4067861	150	Heterozygous	LDX	Heterozygous	LDX
6	4598580	4599175	597	Heterozygous	LDX	Heterozygous	LDX
6	5043023	5043760	739	LDX	LDX	LDX	LDX
6	5055602	5055839	239	LDX	LDX	LDX	LDX
6	5172611	5172971	362	LDX	LDX	LDX	LDX
6	5485104	5485332	230	LDX	LDX	LDX	LDX
6	5840115	5840621	508	LDX	LDX	LDX	LDX
6	6446953	6447775	824	LDX	LDX	LDX	LDX
6	6545186	6545203	19	LDX	LDX	LDX	LDX
6	6954184	6955006	824	LDX	LDX	LDX	LDX
6	6979396	6980171	777	LDX	LDX	LDX	LDX
6	7544125	7544469	346	LDX	LDX	LDX	LDX
6	7660821	7660845	26	LDX	LDX	LDX	LDX
6	7848480	7848644	166	LDX	LDX	LDX	LDX
6	7975773	7976298	527	LDX	LDX	LDX	LDX
6	8227114	8227252	140	LDX	No association detected	LDX	No association detected
6	8758641	8758716	77	LDX	LDX	LDX	LDX
6	8993905	8994797	894	LDX	LDX	LDX	LDX
6	9314377	9314445	70	LDX	No association detected	LDX	LDX
6	9391304	9392006	704	LDX	LDX	LDX	LDX
6	9477911	9477995	86	LDX	LDX	LDX	LDX
6	9596654	9597305	653	LDX	LDX	LDX	LDX
6	9629195	9629409	216	LDX	No association detected	LDX	No association detected
6	10771075	10771391	318	LDX	LDX	LDX	LDX
6	10846150	10846324	176	LDX	LDX	LDX	LDX
6	10848538	10849145	609	LDX	LDX	LDX	LDX
6	10874367	10874673	308	LDX	LDX	LDX	LDX
6	10999775	11000220	447	LDX	LDX	LDX	LDX
6	11310684	11310961	279	LDX	LDX	LDX	LDX
6	11386253	11386464	213	LDX	LDX	LDX	LDX
6	11412730	11413121	393	LDX	LDX	LDX	LDX
6	11419116	11419200	86	LDX	LDX	LDX	LDX
6	11893194	11893374	182	LDX	LD	LDX	LDX
6	12225649	12225855	208	LD	LD	N/D	LDX
6	12337305	12337634	331	LD	LD	N/D	LDX
6	12598838	12598869	33	LD	LD	N/D	LDX
6	12843296	12843555	261	LD	LD	N/D	LD
6	12849439	12849491	54	LD	No association detected	N/D	LDX
6	12922414	12922497	85	LD	LD	N/D	LD
6	13301872	13302727	857	LD	LD	Heterozygous	LDX
6	13450926	13451498	574	LD	LD	Heterozygous	LDX
6	13452628	13452786	160	LD	LD	Heterozygous	LDX
6	13454465	13454515	52	LD	N/D	Heterozygous	N/D
6	13629564	13629662	100	LD	LDX	Heterozygous	LDX
6	13804013	13804085	74	LD	LD	Heterozygous	LDX
6	13841756	13841845	91	LD	LD	Heterozygous	No association detected
6	14014409	14014444	37	LD	No association detected	Heterozygous	No association detected
6	14119768	14120098	332	LD	LD	Heterozygous	LDX
6	14180487	14180510	25	LD	LD	Heterozygous	LD
6	14391075	14391297	224	LD	LD	Heterozygous	LDX
6	14471363	14471426	65	LD	LD	Heterozygous	No association detected
6	14495580	14495831	253	LD	LD	Heterozygous	LDX
6	14547226	14547962	738	LD	No association detected	Heterozygous	LDX
6	14596467	14597640	1175	LD	LD	Heterozygous	LDX
6	14648804	14649341	539	LD	LD	Heterozygous	LDX
6	14662757	14662896	141	LD	LD	Heterozygous	LDX
6	14886822	14887334	514	LD	LD	Heterozygous	No association detected
6	15232767	15233998	1233	Heterozygous	No association detected	LD	LD
6	15508566	15509262	698	Heterozygous	LD	LD	LD
6	15664065	15664809	746	Heterozygous	LD	LD	LD
6	15718993	15720671	1680	Heterozygous	LDX	LD	LD
6	15846024	15846173	151	Heterozygous	No association detected	LD	LD
6	15930741	15931455	716	Heterozygous	LDX	LD	LD
6	15943405	15943892	489	Heterozygous	No association detected	LD	LD
6	16037058	16037155	99	Heterozygous	LD	LD	LD
6	16187870	16188067	199	Heterozygous	LDX	LD	LD
6	16243233	16243683	452	Heterozygous	No association detected	LD	LD
6	16306410	16306943	535	Heterozygous	LDX	LD	LD
6	16391630	16392399	771	Heterozygous	LDX	LD	LD
6	16489012	16489086	76	Heterozygous	LDX	LD	LD
6	16779485	16779708	225	Heterozygous	No association detected	LD	LD
6	16781026	16781702	678	Heterozygous	LDX	LD	LD
6	16781863	16781950	89	Heterozygous	No association detected	LD	LD
6	16930006	16930660	656	Heterozygous	LDX	LD	LD
6	16981403	16981538	137	Heterozygous	No association detected	LD	LD
6	16987177	16987220	45	Heterozygous	No association detected	LD	No association detected
6	17247534	17248370	838	Heterozygous	LDX	LD	LD
6	17306525	17306825	302	Heterozygous	LDX	LD	N/D
6	17422558	17422847	291	Heterozygous	No association detected	LD	LD
6	17444289	17444944	657	Heterozygous	No association detected	LD	LD
6	17566949	17567062	115	Heterozygous	No association detected	LD	LD
6	17687996	17688613	619	Heterozygous	LDX	LD	LD
6	17992432	17992786	356	Heterozygous	No association detected	LD	LD
6	18068086	18068273	189	Heterozygous	LDX	LD	LDX
6	18182910	18182938	30	Heterozygous	LD	LD	LD
6	18248443	18248493	52	Heterozygous	N/D	LD	N/D
6	18364312	18365358	1048	Heterozygous	LDX	LD	LD
6	18580193	18581443	1252	Heterozygous	LDX	LD	LD
6	18598890	18599104	216	Heterozygous	No association detected	LD	LD
6	18756142	18756743	603	Heterozygous	LDX	LD	LD
6	18913343	18913382	41	Heterozygous	No association detected	LD	LD
6	19071591	19071723	134	Heterozygous	No association detected	N/D	LD
6	19324345	19324622	279	Heterozygous	No association detected	N/D	LD
6	19690297	19690477	182	Heterozygous	No association detected	N/D	No association detected
6	19734150	19734885	737	Heterozygous	LD	N/D	LD
6	20104868	20105923	1057	Heterozygous	LD	N/D	LD
6	20715952	20716017	67	Heterozygous	LDX	N/D	No association detected
6	20720215	20720338	125	Heterozygous	No association detected	N/D	LD
6	20803218	20803318	102	Heterozygous	No association detected	N/D	LD
6	22059441	22060252	813	Heterozygous	No association detected	N/D	LDX
6	22150302	22150309	9	Heterozygous	No association detected	N/D	LD
6	22669288	22669325	39	Heterozygous	No association detected	N/D	LD
6	23647874	23648370	498	Heterozygous	No association detected	Heterozygous	LD
6	28023135	28023974	841	Heterozygous	No association detected	Heterozygous	LD
6	28036356	28036839	485	Heterozygous	No association detected	Heterozygous	No association detected
6	28763207	28764058	853	Heterozygous	LDX	Heterozygous	LD
6	34937241	34937870	631	Heterozygous	LDX	Heterozygous	LD
6	35169464	35169543	81	Heterozygous	No association detected	Heterozygous	LD
6	35532920	35533402	484	Heterozygous	No association detected	Heterozygous	LD
6	36750581	36752034	1455	Heterozygous	No association detected	Heterozygous	LD
6	37704315	37705181	868	Heterozygous	LD	Heterozygous	LD
6	38050718	38050968	252	Heterozygous	LD	Heterozygous	LD
6	38117966	38118217	253	Heterozygous	LD	Heterozygous	LD
6	38663937	38664260	325	Heterozygous	No association detected	Heterozygous	LD
6	38897941	38898130	191	Heterozygous	No association detected	Heterozygous	LD
6	39052443	39052913	472	Heterozygous	LD	N/D	LD
6	39214521	39214643	124	Heterozygous	LD	N/D	LD
6	39286758	39287685	929	Heterozygous	No association detected	N/D	LD
6	39742643	39743078	437	Heterozygous	No association detected	N/D	LD
6	39820040	39820568	530	Heterozygous	No association detected	N/D	LD
6	40953134	40953499	367	Heterozygous	LDX	N/D	LD
6	41023700	41023795	97	Heterozygous	LD	N/D	No association detected
6	41435164	41435676	514	Heterozygous	LD	N/D	LD
6	41586887	41586908	23	Heterozygous	No association detected	N/D	LD
6	41833023	41833194	173	Heterozygous	LD	N/D	LD
6	42122560	42123181	623	Heterozygous	LD	N/D	LD
6	42140883	42141499	618	Heterozygous	LD	N/D	LD
6	42408449	42409095	648	Heterozygous	LD	N/D	LD
6	42535440	42535908	470	Heterozygous	LD	N/D	LD
6	42924972	42925293	323	Heterozygous	LD	N/D	LD
6	42927042	42927609	569	Heterozygous	No association detected	N/D	No association detected
6	43009475	43010040	567	Heterozygous	LDX	N/D	No association detected
6	43145640	43146621	983	Heterozygous	No association detected	N/D	LD
6	43859647	43860297	652	Heterozygous	LDX	N/D	LDX
6	43884621	43885147	528	Heterozygous	LDX	N/D	No association detected
6	43970015	43970553	540	Heterozygous	LDX	N/D	No association detected
6	44002838	44003639	803	Heterozygous	LDX	LDX	LD
6	44185202	44185453	253	Heterozygous	No association detected	LDX	No association detected
6	44237385	44237588	205	Heterozygous	LD	LDX	No association detected
6	44270931	44271533	604	Heterozygous	No association detected	LDX	No association detected
6	44309752	44310207	457	Heterozygous	No association detected	LDX	No association detected
6	44315788	44316422	636	Heterozygous	LD	LDX	No association detected
6	44528863	44529114	253	Heterozygous	LDX	LDX	LDX
6	44583723	44583775	54	Heterozygous	LD	LDX	No association detected
6	44600145	44600223	80	Heterozygous	LD	LDX	No association detected
6	44600789	44601094	307	Heterozygous	No association detected	LDX	No association detected
6	44721023	44721389	368	Heterozygous	No association detected	LDX	LD
6	44965129	44965526	399	Heterozygous	No association detected	LDX	LDX
6	45068386	45068955	571	Heterozygous	No association detected	LDX	LDX
6	45069577	45069865	290	Heterozygous	No association detected	LDX	LDX
6	45132565	45132739	176	Heterozygous	N/D	LDX	N/D
6	45186480	45186849	371	Heterozygous	LD	LDX	LDX
6	45224671	45225271	602	Heterozygous	No association detected	LDX	LDX
6	45226678	45227131	455	Heterozygous	No association detected	LDX	LDX
6	45445600	45445834	236	Heterozygous	No association detected	LDX	LDX
6	45634905	45635068	165	Heterozygous	LDX	LDX	LDX
6	45885826	45886206	382	Heterozygous	No association detected	LDX	LDX
6	46124848	46124869	23	LDX	LD	LDX	LDX
6	46176377	46177128	753	LDX	LDX	LDX	LDX
6	46265087	46265592	507	LDX	LDX	LDX	No association detected
6	46409008	46409584	578	LDX	LD	LDX	LDX
6	46410004	46410017	15	LDX	No association detected	LDX	LDX
6	46512720	46513258	540	LDX	No association detected	LDX	LDX
6	46521905	46522417	514	LDX	No association detected	LDX	LDX
6	46586768	46587270	504	LDX	No association detected	LDX	LDX
6	46592660	46592744	86	LDX	LDX	LDX	LDX
6	46666722	46667341	621	LDX	No association detected	LDX	LDX
6	46779849	46779957	110	LDX	LDX	LDX	LDX
6	46841479	46841815	338	LDX	No association detected	LDX	LDX
6	47416921	47417462	543	Heterozygous	No association detected	LDX	LDX
6	47459389	47460509	1122	Heterozygous	No association detected	LDX	LDX
6	47573035	47573650	617	Heterozygous	LD	LDX	LDX
6	47827003	47827204	203	Heterozygous	LD	LDX	LD
6	48539285	48539433	150	LD	LDX	LDX	LDX
6	48770869	48771217	350	LD	No association detected	LDX	No association detected
6	48980535	48980704	171	LD	No association detected	LDX	No association detected
6	48980716	48981058	344	LD	No association detected	LDX	No association detected
6	49209079	49209365	288	Heterozygous	LDX	LDX	LDX
6	49269640	49269670	32	Heterozygous	LDX	LDX	LDX
6	49302554	49303084	532	Heterozygous	No association detected	LDX	LDX
6	49483150	49483472	324	Heterozygous	LDX	LDX	LDX
6	49649856	49650541	687	Heterozygous	No association detected	LDX	No association detected
6	49681226	49682396	1172	Heterozygous	No association detected	LDX	LDX
6	49897257	49897514	259	Heterozygous	No association detected	LDX	LDX
6	50006561	50006597	38	Heterozygous	LDX	LDX	LDX
6	50056445	50056654	211	Heterozygous	LD	LDX	LDX
6	50211858	50212783	927	Heterozygous	LDX	LDX	LDX
6	50330182	50330973	793	Heterozygous	No association detected	LDX	LDX
6	50442826	50442868	44	Heterozygous	LDX	LDX	LDX
7	122412	122594	184	N/D	LD	N/D	LDX
7	393126	393153	29	N/D	LD	N/D	LDX
7	805182	805457	277	N/D	LD	N/D	LDX
7	1000191	1000770	581	LD	LD	LDX	LDX
7	1037166	1037345	181	LD	LD	LDX	LDX
7	1062425	1062619	196	LD	LD	LDX	LDX
7	1218315	1218920	607	LD	LD	LDX	LDX
7	1423792	1423899	109	LD	LD	LDX	LDX
7	1423980	1424446	468	LD	LD	LDX	LDX
7	1461770	1462177	409	LD	LD	LDX	LDX
7	1588238	1588466	230	LD	LD	LDX	LDX
7	1729809	1729843	36	LD	LD	LDX	LDX
7	2010456	2011091	637	N/D	LD	LDX	LDX
7	2273961	2274124	165	N/D	LD	LDX	No association detected
7	2847660	2848317	659	N/D	LDX	LDX	LDX
7	2972156	2972201	47	N/D	LDX	LDX	LDX
7	3449108	3449361	255	LDX	LDX	LDX	LDX
7	3592832	3593151	321	LDX	LDX	LDX	LDX
7	3855203	3855324	123	LDX	No association detected	LDX	LDX
7	3883240	3883587	349	LDX	LDX	LDX	LDX
7	4070909	4071236	329	LDX	LDX	LDX	LDX
7	4080893	4081557	666	LDX	LDX	LDX	LDX
7	4200774	4201357	585	LDX	LD	LDX	LDX
7	5554783	5554791	10	Heterozygous	LD	Heterozygous	No association detected
7	5625365	5625420	57	Heterozygous	LDX	Heterozygous	LDX
7	5724415	5725718	1305	Heterozygous	LD	Heterozygous	LDX
7	6768938	6769409	473	Heterozygous	LD	Heterozygous	LDX
7	8712718	8712949	233	Heterozygous	LDX	Heterozygous	No association detected
7	8744790	8745070	282	Heterozygous	LDX	Heterozygous	LDX
7	9103343	9103586	245	Heterozygous	LD	Heterozygous	LDX
7	9419930	9419999	71	Heterozygous	LD	Heterozygous	No association detected
7	9795636	9796187	553	Heterozygous	LD	Heterozygous	LDX
7	10042702	10042939	239	Heterozygous	LDX	Heterozygous	No association detected
7	10061142	10061194	54	Heterozygous	LD	Heterozygous	LD
7	12019810	12020030	222	N/D	No association detected	Heterozygous	LDX
7	13276984	13277223	241	LDX	No association detected	Heterozygous	LDX
7	13309974	13310259	287	LDX	LD	Heterozygous	LDX
7	13794820	13795021	203	LDX	No association detected	Heterozygous	LDX
7	14159180	14160113	935	Heterozygous	LD	Heterozygous	LDX
7	15221654	15221821	169	Heterozygous	LDX	Heterozygous	No association detected
7	15305671	15305711	42	Heterozygous	LD	Heterozygous	LDX
7	15684311	15685197	888	Heterozygous	LD	Heterozygous	LDX
7	16271402	16271715	315	Heterozygous	No association detected	Heterozygous	LDX
7	16392529	16392641	114	Heterozygous	LDX	Heterozygous	LDX
7	16572097	16572251	156	Heterozygous	LDX	Heterozygous	LDX
7	16880303	16880562	261	Heterozygous	LD	Heterozygous	LDX
7	17675093	17675461	370	LDX	No association detected	LDX	LDX
7	17918799	17919107	310	LDX	LDX	LDX	LDX
7	18045412	18045596	186	LDX	No association detected	Heterozygous	LDX
7	19108236	19108460	226	Heterozygous	LD	LD	LD
7	19543223	19544084	863	Heterozygous	No association detected	LD	No association detected
7	20593493	20593568	77	N/D	No association detected	N/D	LD
7	21555642	21556481	841	LDX	LD	Heterozygous	No association detected
7	21620298	21621061	765	LDX	LD	Heterozygous	LD
7	21632164	21632363	201	LDX	No association detected	Heterozygous	LD
7	22838953	22839036	85	Heterozygous	No association detected	Heterozygous	LD
7	25523527	25523616	91	Heterozygous	No association detected	N/D	LD
7	33992060	33992350	292	Heterozygous	No association detected	Heterozygous	LDX
7	34353018	34353172	156	Heterozygous	No association detected	N/D	LD
7	34654123	34654373	252	Heterozygous	No association detected	N/D	LD
7	35139440	35139523	85	Heterozygous	LD	LD	LD
7	35623973	35624228	257	Heterozygous	No association detected	LD	LD
7	35789130	35789331	203	Heterozygous	No association detected	LD	LD
7	36069784	36069880	98	LDX	No association detected	LD	LD
7	36469337	36469894	559	LDX	LDX	LD	No association detected
7	36510879	36510912	35	LDX	No association detected	LD	LD
7	36544621	36544885	266	LDX	LDX	LD	LD
7	36546502	36547135	635	LDX	No association detected	LD	LD
7	36660495	36660903	410	LDX	LD	LD	LD
7	36663688	36663975	289	LDX	No association detected	LD	LD
7	36938961	36940091	1132	LDX	LDX	LD	LD
7	36954063	36954441	380	LDX	No association detected	LD	LD
7	37153581	37153704	125	LDX	LDX	LD	LD
7	37251993	37253539	1548	LDX	No association detected	LD	LD
7	37676218	37677120	904	LDX	LDX	LD	LD
7	37900260	37900313	55	LDX	LDX	LD	No association detected
7	37941344	37941598	256	LDX	LD	LD	LD
7	38145532	38145842	312	LDX	No association detected	Heterozygous	LD
7	38288204	38288321	119	LDX	No association detected	Heterozygous	LD
7	38530668	38530976	310	LDX	LDX	Heterozygous	LDX
7	38581834	38581941	109	LDX	LDX	Heterozygous	No association detected
7	38721232	38721480	250	LDX	LDX	Heterozygous	No association detected
7	39473472	39473637	167	LDX	LD	LDX	No association detected
7	39503843	39504636	795	LDX	LDX	LDX	LDX
7	39635335	39635721	388	LDX	LDX	LDX	LDX
7	40553215	40554043	830	LDX	LDX	LDX	LDX
7	41021438	41021865	429	N/D	LDX	LDX	LDX
7	41341789	41342082	295	N/D	LDX	LDX	LDX
7	41507386	41507532	148	N/D	LDX	LDX	LDX
7	41643580	41644655	1077	N/D	LDX	LDX	LDX
7	41729581	41729719	140	N/D	LDX	LDX	LDX
7	42394909	42395673	766	Heterozygous	LDX	LDX	LDX
7	42641853	42642022	171	Heterozygous	LDX	LDX	LDX
7	42661458	42662154	698	Heterozygous	No association detected	LDX	LDX
7	43067565	43067649	86	Heterozygous	LDX	LDX	LDX
7	43093400	43093573	175	Heterozygous	LD	LDX	LDX
7	43458143	43458440	299	Heterozygous	No association detected	LDX	LDX
7	43663431	43663886	457	Heterozygous	LD	LDX	No association detected
7	44236241	44236445	206	N/D	No association detected	N/D	LDX
7	44263527	44264301	776	N/D	No association detected	N/D	LDX
7	44334754	44334804	52	N/D	No association detected	N/D	LDX
7	44596966	44597066	102	N/D	LD	N/D	No association detected
8	96246	97045	801	LD	LDX	LDX	LD
8	128848	128957	111	LD	LD	LDX	LDX
8	134816	135315	501	LD	LD	LDX	LDX
8	204951	205007	58	LD	LD	LDX	LDX
8	257391	257661	272	LD	LD	LDX	LDX
8	373656	373878	224	LD	LD	LDX	LDX
8	668692	668936	246	LD	No association detected	LDX	LDX
8	675526	676326	802	LD	LD	LDX	LDX
8	814272	815105	835	LD	LD	LDX	LDX
8	824501	824882	383	LD	LD	LDX	LDX
8	972430	973133	705	LD	LD	LDX	LDX
8	976299	976436	139	LD	LD	LDX	LDX
8	1046288	1046951	665	LD	LD	LDX	LDX
8	1249602	1251278	1678	LD	LD	LDX	No association detected
8	1347211	1347862	653	LD	LD	LDX	LDX
8	1592102	1592460	360	LD	No association detected	LDX	LDX
8	2209343	2209688	347	LD	LD	LDX	LDX
8	2231284	2231512	230	LD	No association detected	LDX	LDX
8	2231513	2231920	409	LD	No association detected	LDX	LDX
8	2254125	2254685	562	LD	LD	LDX	LDX
8	2263351	2264079	730	LD	LD	LDX	LDX
8	2359012	2359542	532	LD	LD	LDX	LDX
8	2385218	2386004	788	LD	LD	LDX	LDX
8	2386595	2387085	492	LD	LD	LDX	LDX
8	2456778	2457531	755	LD	LD	LDX	LDX
8	2504112	2504681	571	LD	LD	LDX	LDX
8	3107289	3108104	817	LD	LD	LDX	LDX
8	3153952	3154120	170	LD	No association detected	LDX	LDX
8	3300796	3301081	287	LD	LD	LDX	LDX
8	3309340	3309985	647	LD	LD	LDX	LDX
8	3407430	3407671	243	LD	LD	LDX	LDX
8	3601098	3601538	442	LD	LD	LDX	LDX
8	3602297	3602630	335	LD	LD	LDX	LDX
8	3645939	3646480	543	LD	LD	LDX	LDX
8	3651174	3651797	625	LD	LD	LDX	LDX
8	3784421	3784765	346	LD	No association detected	LDX	LDX
8	3960118	3960434	318	LD	No association detected	LDX	LDX
8	3990425	3990746	323	LD	LD	LDX	LDX
8	4087007	4087686	681	LD	No association detected	LDX	LDX
8	4395470	4396048	580	LD	LD	LDX	LDX
8	4493130	4493387	259	LD	LD	LDX	LDX
8	4630162	4630316	156	LD	No association detected	LDX	LDX
8	4776690	4777057	369	LD	LD	LDX	LDX
8	4804367	4805818	1453	LD	LD	LDX	LDX
8	4807033	4807852	821	LD	LD	LDX	LDX
8	4963724	4964247	525	LD	LD	LDX	LDX
8	5490218	5490637	421	Heterozygous	LDX	LDX	LDX
8	5516261	5517282	1023	Heterozygous	LDX	LDX	LDX
8	5549806	5550548	744	Heterozygous	LDX	LDX	LDX
8	5559448	5560023	577	Heterozygous	LDX	LDX	LDX
8	5726688	5726909	223	Heterozygous	LDX	LDX	No association detected
8	5842256	5842313	59	Heterozygous	No association detected	LDX	No association detected
8	5926315	5926878	565	Heterozygous	LDX	LDX	LDX
8	6252537	6253381	846	N/D	LDX	LDX	LDX
8	6499080	6499697	619	N/D	LDX	LDX	LDX
8	6595213	6595302	91	N/D	LDX	LDX	LD
8	6956874	6956923	51	N/D	LDX	LDX	LDX
8	7279108	7279288	182	LDX	No association detected	LDX	LDX
8	7473046	7473238	194	LDX	No association detected	LDX	LDX
8	7494138	7494511	375	LDX	LDX	LDX	LDX
8	7852502	7852915	415	LDX	LDX	LDX	LDX
8	7877464	7877701	239	LDX	LDX	LDX	LDX
8	7912731	7913245	516	LDX	LDX	LDX	LDX
8	7917090	7918041	953	LDX	LDX	LDX	LDX
8	7925109	7925641	534	LDX	LDX	LDX	LDX
8	7932406	7933012	608	LDX	LDX	LDX	LDX
8	8004536	8005055	521	LDX	LDX	LDX	LDX
8	8253014	8253501	489	LDX	LDX	LDX	LDX
8	8320474	8320978	506	LDX	LDX	LDX	LDX
8	8520683	8521407	726	LDX	LDX	LDX	LDX
8	8647791	8648510	721	LDX	LDX	LDX	LDX
8	8690464	8691175	713	LDX	LDX	LDX	LDX
8	8801140	8801854	716	LDX	LDX	LDX	LDX
8	9490650	9491321	673	LDX	LDX	LDX	LDX
8	9492087	9492105	20	LDX	N/D	LDX	N/D
8	9517617	9518537	922	LDX	LDX	LDX	LDX
8	9565212	9566483	1273	LDX	LDX	LDX	LDX
8	9599657	9599700	45	LDX	N/D	LDX	N/D
8	9666197	9666769	574	LDX	LDX	LDX	LDX
8	9706458	9706829	373	LDX	LDX	LDX	LDX
8	9721821	9721866	47	LDX	LDX	LDX	LDX
8	9774188	9775988	1802	LDX	LDX	LDX	LDX
8	9913369	9914090	723	LDX	LDX	LDX	LDX
8	10483946	10484133	189	LDX	LDX	LDX	LD
8	10509710	10510191	483	LDX	LDX	LDX	LDX
8	10532540	10532908	370	LDX	LDX	LDX	No association detected
8	11094390	11095071	683	LDX	LDX	LDX	LD
8	11284734	11285188	456	LDX	LDX	LDX	LDX
8	11465143	11465297	156	LDX	LDX	LDX	LDX
8	12101712	12101762	52	LDX	LDX	LDX	LDX
8	12157502	12157865	365	LDX	LDX	LDX	LDX
8	12210797	12211182	387	LDX	LDX	LDX	LDX
8	12271909	12272098	191	LDX	LDX	LDX	LDX
8	12395200	12395317	119	LDX	LDX	LDX	LDX
8	12408206	12408559	355	LDX	LDX	LDX	LDX
8	12493543	12493883	342	LDX	LDX	LDX	LDX
8	12662356	12662684	330	LDX	LDX	LDX	LD
8	12764808	12765001	195	LDX	LDX	LDX	LDX
8	13136688	13137434	748	LDX	LDX	LDX	LDX
8	13152551	13153389	840	LDX	LDX	LDX	LDX
8	13794210	13794236	28	LDX	LDX	LDX	LDX
8	13847518	13848030	514	LDX	LDX	LDX	LDX
8	13885632	13885782	152	LDX	LDX	LDX	LDX
8	13960031	13960875	846	LDX	LDX	LDX	LDX
8	14193156	14193302	148	LDX	LDX	LDX	LDX
8	14382233	14382801	570	LDX	LDX	LDX	LDX
8	14449078	14449590	514	LDX	LDX	LDX	LDX
8	14896093	14896427	336	LDX	LDX	LDX	LDX
8	15403818	15404472	656	LDX	LDX	LDX	LDX
8	15409382	15409733	353	LDX	LDX	LDX	LDX
8	15529500	15530445	947	LDX	LDX	LDX	LDX
8	15557039	15557513	476	LDX	LDX	LDX	LDX
8	15779289	15779692	405	LDX	LDX	LDX	LDX
8	15893643	15893919	278	LDX	LDX	LDX	LDX
8	15919830	15920112	284	LDX	No association detected	LDX	No association detected
8	15927214	15927631	419	LDX	LDX	LDX	LDX
8	16163850	16164680	832	Heterozygous	No association detected	LDX	LDX
8	16284645	16285136	493	Heterozygous	LDX	LDX	LDX
8	16448429	16448468	41	Heterozygous	No association detected	LDX	LDX
8	16489954	16490048	96	Heterozygous	LDX	LDX	LDX
8	16551962	16552054	94	Heterozygous	LDX	LDX	LDX
8	16689182	16689887	707	Heterozygous	LD	LDX	LDX
8	16713419	16714182	765	Heterozygous	LD	LDX	LDX
8	16992307	16992360	55	Heterozygous	LD	LDX	LDX
8	17016359	17016480	123	Heterozygous	LD	LDX	LDX
8	17019613	17019735	124	Heterozygous	No association detected	LDX	LDX
8	17043768	17044815	1049	Heterozygous	LD	LDX	LDX
8	17065535	17065615	82	Heterozygous	LD	LDX	LDX
8	17068299	17068685	388	Heterozygous	LD	LDX	No association detected
8	17341171	17342161	992	Heterozygous	LDX	LDX	LDX
8	17583396	17583669	275	Heterozygous	LD	LDX	LDX
8	18285058	18285302	246	LDX	LDX	LDX	LDX
8	19101249	19101547	300	LDX	LD	LDX	LD
8	20736339	20736441	104	LDX	LD	LDX	LD
8	21937882	21938121	241	N/D	LD	N/D	No association detected
8	22118493	22118729	238	LD	LD	LD	LD
8	22177575	22177792	219	LD	LD	LD	LD
8	22307303	22307619	318	LD	LD	LD	No association detected
8	22397611	22397678	69	LD	LD	LD	LD
8	22587224	22587273	51	LD	N/D	LD	N/D
8	23287729	23287976	249	LD	LD	LD	LD
8	23433755	23434011	258	LD	LD	LD	LD
8	23480464	23480814	352	LD	LD	LD	LD
8	23511495	23511853	360	LD	LD	LD	LD
8	24681177	24681511	336	LD	LD	LD	LD
8	25767714	25767949	237	LD	LD	LD	LD
8	28558936	28559557	623	LD	LD	LD	LD
8	28779130	28779803	675	LD	LD	LD	LD
8	29223847	29224211	366	LD	LD	LD	LD
8	29791732	29792734	1004	LD	LD	LD	LD
8	29814603	29814877	276	LD	LD	LD	LDX
8	30172671	30173200	531	LD	LD	LD	LD
8	30288348	30288768	422	LD	LD	LD	LD
8	31409725	31409834	111	LD	LD	LD	LDX
8	31705460	31705767	309	LD	LD	LD	LD
8	31706518	31706710	194	LD	LD	LD	LD
8	33810043	33810403	362	LD	LD	LD	LD
8	34056942	34057147	207	LD	LD	LD	LD
8	34805889	34805943	56	LD	LD	LD	LD
8	35168316	35168524	210	LD	LD	LD	LD
8	35922951	35923291	342	LD	LD	LD	LD
8	36999606	37000115	511	LD	LD	LD	LD
8	37237699	37237801	104	LD	LDX	LD	LDX
8	37292741	37293213	474	LD	LD	LD	LD
8	38237978	38238255	279	Heterozygous	LD	Heterozygous	LD
8	38267986	38268813	829	Heterozygous	LD	Heterozygous	LD
8	38269779	38270302	525	Heterozygous	LD	Heterozygous	LD
8	38294513	38294582	71	Heterozygous	LD	Heterozygous	LD
8	38400364	38400837	475	Heterozygous	No association detected	Heterozygous	No association detected
8	38639920	38640011	93	Heterozygous	LD	Heterozygous	LD
8	38765792	38766214	424	Heterozygous	LD	Heterozygous	LD
8	38838039	38838381	344	Heterozygous	LD	Heterozygous	LD
8	38896360	38896778	420	Heterozygous	LD	Heterozygous	LD
8	38931542	38931846	306	Heterozygous	LD	Heterozygous	LD
8	39059944	39060116	174	Heterozygous	LD	Heterozygous	LD
8	39113723	39114154	433	Heterozygous	No association detected	Heterozygous	No association detected
8	39284895	39285422	529	Heterozygous	LD	Heterozygous	LD
8	39394610	39394728	120	Heterozygous	LD	Heterozygous	LD
8	39662146	39662270	126	Heterozygous	LD	Heterozygous	LD
8	39690515	39691187	674	Heterozygous	LD	Heterozygous	No association detected
8	39895068	39895486	420	Heterozygous	LD	Heterozygous	LD
8	40061577	40061806	231	Heterozygous	LD	Heterozygous	LD
8	40139604	40139920	318	Heterozygous	No association detected	Heterozygous	No association detected
8	40326431	40326811	382	Heterozygous	LD	Heterozygous	LD
8	40751681	40751983	304	Heterozygous	LD	Heterozygous	LD
8	40868572	40868908	338	Heterozygous	LD	Heterozygous	LD
8	40874327	40874516	191	Heterozygous	No association detected	Heterozygous	No association detected
8	41196547	41197214	669	LDX	LD	LDX	LD
8	41401407	41402073	668	LDX	LD	LDX	LD
8	41405422	41405560	140	LDX	No association detected	LDX	LD
8	41408721	41409148	429	LDX	LD	LDX	LD
8	41507493	41507727	236	LDX	LDX	LDX	LDX
8	41571328	41571494	168	LDX	LD	LDX	No association detected
8	42021464	42022178	716	LD	LD	Heterozygous	No association detected
8	42091085	42091135	52	LD	LD	Heterozygous	No association detected
8	42109344	42109356	14	LD	LD	Heterozygous	No association detected
8	42126253	42126818	567	LD	LD	Heterozygous	No association detected
8	42647637	42648649	1014	LD	LD	Heterozygous	LD
8	42678718	42678835	119	LD	No association detected	Heterozygous	No association detected
8	42681348	42682112	766	LD	LD	Heterozygous	No association detected
8	42759197	42759725	530	LD	LD	Heterozygous	LDX
8	42782094	42782641	549	LD	LD	Heterozygous	LD
8	42905843	42906035	194	LD	N/D	Heterozygous	N/D
8	43305198	43305363	167	LD	LD	Heterozygous	No association detected
8	43372444	43373493	1051	LD	LD	Heterozygous	LD
8	43458987	43459602	617	LD	LD	Heterozygous	No association detected
8	43464354	43464382	30	LD	No association detected	Heterozygous	LDX
8	43516742	43517042	302	LD	LD	Heterozygous	No association detected
8	43658681	43658914	235	LD	LD	Heterozygous	No association detected
8	43658923	43659214	293	LD	LD	Heterozygous	No association detected
8	43668866	43669208	344	LD	LD	Heterozygous	LD
8	43678525	43678918	395	LD	LD	Heterozygous	No association detected
8	43935773	43936212	441	LD	LD	Heterozygous	LD
8	43946458	43946605	149	LD	LD	Heterozygous	LD
8	43977534	43978070	538	LD	LD	Heterozygous	No association detected
8	44031083	44031835	754	LD	LDX	Heterozygous	LDX
8	44066199	44066543	346	LD	LD	Heterozygous	No association detected
8	44103673	44104078	407	LD	LD	Heterozygous	LD
8	44339017	44339085	70	LD	LD	Heterozygous	No association detected
8	44465569	44466226	659	LD	LD	Heterozygous	LDX
8	44854595	44855043	450	LD	LD	Heterozygous	LD
8	45279077	45279519	444	LD	LD	Heterozygous	LDX
8	45786762	45786887	127	LD	LD	Heterozygous	LDX
8	45908453	45909024	573	LD	LD	Heterozygous	No association detected
8	46191230	46191814	586	Heterozygous	LD	Heterozygous	LD
9	245071	245095	26	LD	LD	LDX	LDX
9	646274	646674	402	LD	No association detected	LDX	LD
9	744211	744707	498	LD	LD	LDX	LDX
9	998231	998399	170	LD	LD	LDX	LDX
9	1010618	1010810	194	LD	LD	LDX	LDX
9	1162805	1162880	77	LD	LD	LDX	LDX
9	1395894	1396049	157	LD	No association detected	LDX	No association detected
9	1618249	1618808	561	LD	LD	LDX	LDX
9	1702678	1703000	324	LD	LD	LDX	LDX
9	1866230	1866660	432	LD	LD	LDX	LDX
9	2000962	2002058	1098	N/D	LD	N/D	LDX
9	2113335	2113344	11	N/D	LD	N/D	LDX
9	2401938	2402118	182	N/D	LD	N/D	LDX
9	2490668	2491057	391	N/D	LDX	N/D	LD
9	2491537	2491893	358	N/D	LDX	N/D	LD
9	2953275	2953454	181	N/D	LDX	N/D	LD
9	2983298	2983323	27	N/D	LDX	N/D	LD
9	3159534	3159726	194	LDX	LDX	LD	LD
9	3160423	3160528	107	LDX	LDX	LD	LD
9	3258297	3258808	513	LDX	No association detected	LD	LD
9	3271588	3272453	867	LDX	LDX	LD	LD
9	3729142	3729165	25	LDX	LDX	LD	No association detected
9	3992955	3993532	579	LDX	LDX	LD	LD
9	3996597	3996968	373	LDX	LDX	LD	LD
9	3999721	4000404	685	LDX	LDX	LD	LD
9	4161203	4161386	185	N/D	LDX	LD	LD
9	4534748	4534892	146	N/D	LD	LD	LDX
9	4652471	4652970	501	N/D	No association detected	LD	LD
9	4765970	4766346	378	N/D	No association detected	LD	LD
9	5227255	5228073	820	Heterozygous	LDX	LD	LD
9	5267514	5268050	538	Heterozygous	No association detected	LD	LD
9	5787736	5788148	414	Heterozygous	No association detected	LD	LD
9	5997283	5997498	217	Heterozygous	No association detected	LD	LD
9	6005198	6005355	159	Heterozygous	No association detected	LD	LD
9	6226229	6226851	624	Heterozygous	LDX	LD	LD
9	6260876	6261542	668	Heterozygous	LDX	LD	LD
9	6475481	6476809	1330	Heterozygous	LDX	LD	LD
9	6479629	6480744	1117	Heterozygous	LDX	LD	LD
9	6534819	6535352	535	Heterozygous	No association detected	LD	LD
9	6861711	6861993	284	Heterozygous	No association detected	LD	LD
9	6993145	6993412	269	Heterozygous	LDX	LD	LD
9	6997723	6997754	33	Heterozygous	LDX	LD	LD
9	7036072	7036209	139	LDX	No association detected	LD	LD
9	7197224	7197717	495	LDX	LD	LD	LD
9	7424054	7424250	198	LDX	LDX	LD	LDX
9	7860019	7860070	53	LDX	No association detected	LD	No association detected
9	7878789	7879127	340	LDX	LDX	LD	LD
9	7919423	7919911	490	LDX	LDX	LD	LD
9	8577511	8577533	24	N/D	LDX	N/D	LD
9	9158896	9159176	282	N/D	LD	N/D	LD
9	9455230	9455597	369	N/D	LDX	N/D	LD
9	9475135	9475816	683	N/D	LDX	N/D	LD
9	9556461	9556500	41	N/D	LDX	N/D	LD
9	9557046	9557100	56	N/D	LDX	N/D	LD
9	11863118	11863320	204	Heterozygous	LDX	Heterozygous	LD
9	12138136	12138612	478	Heterozygous	LDX	Heterozygous	LD
9	12234418	12234504	88	Heterozygous	LDX	Heterozygous	LD
9	12238191	12238576	387	Heterozygous	LDX	Heterozygous	LDX
9	13094827	13095156	331	Heterozygous	LDX	Heterozygous	LD
9	15428538	15428566	30	Heterozygous	No association detected	Heterozygous	No association detected
9	16334196	16334479	285	Heterozygous	LD	Heterozygous	LDX
9	17018964	17019215	253	Heterozygous	LDX	Heterozygous	LD
9	17572531	17573217	688	Heterozygous	LDX	Heterozygous	LD
9	17798818	17799277	461	Heterozygous	LDX	Heterozygous	No association detected
9	18442620	18443428	810	Heterozygous	LDX	Heterozygous	LD
9	18588573	18588597	26	Heterozygous	LDX	Heterozygous	LD
9	18620457	18621255	800	Heterozygous	LDX	Heterozygous	No association detected
9	18979690	18980173	485	Heterozygous	LDX	Heterozygous	LD
9	19344479	19345166	689	Heterozygous	LD	Heterozygous	No association detected
9	19537921	19538026	107	Heterozygous	LDX	Heterozygous	No association detected
9	19538054	19538186	134	Heterozygous	LDX	Heterozygous	LD
9	19749224	19749346	124	Heterozygous	LDX	Heterozygous	No association detected
9	20328224	20328623	401	Heterozygous	LDX	Heterozygous	LDX
9	22062483	22062897	416	Heterozygous	LDX	Heterozygous	LD
9	22924837	22925078	243	Heterozygous	LDX	Heterozygous	LDX
9	24210598	24211678	1082	Heterozygous	LDX	Heterozygous	LD
9	26288713	26289540	829	Heterozygous	LDX	Heterozygous	No association detected
9	26290907	26291579	674	Heterozygous	LDX	Heterozygous	LD
9	26467753	26467773	22	Heterozygous	No association detected	Heterozygous	LD
9	27026587	27027114	529	Heterozygous	No association detected	Heterozygous	LD
9	28452635	28452812	179	Heterozygous	No association detected	Heterozygous	LD
9	28566826	28567280	456	Heterozygous	No association detected	Heterozygous	No association detected
9	30126679	30127042	365	Heterozygous	LDX	Heterozygous	No association detected
9	32568940	32569392	454	Heterozygous	LD	Heterozygous	No association detected
9	33138514	33138636	124	Heterozygous	LDX	Heterozygous	LD
9	33220945	33221101	158	Heterozygous	LDX	Heterozygous	LDX
9	33407475	33408086	613	Heterozygous	LDX	Heterozygous	No association detected
9	33456891	33456952	63	Heterozygous	LDX	Heterozygous	No association detected
9	33586551	33587006	457	Heterozygous	LD	Heterozygous	No association detected
9	33992249	33992310	63	Heterozygous	LD	Heterozygous	No association detected
9	34383890	34384016	128	LDX	LDX	LDX	LDX
9	34765399	34765488	91	LDX	LDX	LDX	No association detected
9	35725146	35725392	248	LDX	LDX	LDX	LDX
9	36755672	36756467	797	LDX	LDX	LDX	LD
9	37572127	37572310	185	LDX	LD	LDX	LDX
9	38230409	38231211	804	LDX	LDX	LDX	LDX
9	38233465	38233501	38	LDX	No association detected	LDX	LDX
9	39100912	39101547	637	Heterozygous	LD	Heterozygous	LDX
9	39502314	39502510	198	Heterozygous	LD	Heterozygous	LD
9	39690241	39691015	776	Heterozygous	No association detected	Heterozygous	LDX
9	39785646	39785692	48	Heterozygous	No association detected	Heterozygous	No association detected
9	40188845	40188978	135	LDX	LD	Heterozygous	LD
9	40391786	40392173	389	LDX	LD	Heterozygous	LDX
9	40407164	40407367	205	LDX	N/D	Heterozygous	LDX
9	40701113	40701405	294	LDX	N/D	Heterozygous	LD
9	40746095	40746681	588	LDX	LDX	Heterozygous	LDX
9	40774277	40774390	115	LDX	No association detected	Heterozygous	No association detected
9	41112374	41113307	935	LDX	LDX	Heterozygous	No association detected
9	42520042	42520256	216	LDX	LDX	N/D	No association detected
9	42691297	42691411	116	LDX	LDX	N/D	No association detected
9	43104717	43104960	245	LDX	LDX	LDX	No association detected
9	43571686	43571772	88	LDX	LD	LDX	LDX
9	43860830	43861952	1124	LDX	LDX	LDX	LDX
9	43900042	43900231	191	LDX	No association detected	LDX	LDX
9	43951678	43952191	515	LDX	LDX	LDX	LDX
9	44017788	44018106	320	LDX	LDX	LDX	LDX
9	44051805	44051824	21	LDX	LDX	LDX	LDX
9	44338853	44339038	187	LDX	LDX	LDX	LDX
9	44459044	44459172	130	LDX	LDX	LDX	LDX
9	44785132	44785342	212	LDX	LDX	LDX	LDX
9	45012568	45012851	285	LDX	LDX	LDX	LDX
9	45122534	45122586	54	LDX	LDX	LDX	LDX
9	45301129	45301885	758	LDX	LDX	LDX	LDX
9	45491504	45492230	728	LDX	LDX	LDX	LDX
9	45731369	45731598	231	LDX	LDX	LDX	LDX
9	45835968	45836514	548	LDX	LDX	LDX	LDX
9	45854292	45854406	116	LDX	LDX	LDX	LDX
9	45882130	45882250	122	LDX	LDX	LDX	LDX
9	45882937	45883143	208	LDX	LDX	LDX	LDX
9	46181938	46182418	482	N/D	LDX	N/D	LDX
9	46203888	46204085	199	N/D	No association detected	N/D	LD
9	46704457	46704946	491	N/D	LD	N/D	LDX
10	62531	62872	343	Heterozygous	LD	LDX	LDX
10	89669	90236	569	Heterozygous	No association detected	LDX	LDX
10	148909	149627	720	Heterozygous	LD	LDX	LDX
10	209487	210706	1221	Heterozygous	LD	LDX	LDX
10	393818	394198	382	Heterozygous	LD	LDX	LDX
10	418226	419495	1271	Heterozygous	LD	LDX	LDX
10	590951	591485	536	Heterozygous	No association detected	LDX	LDX
10	751929	752306	379	Heterozygous	LD	LDX	LDX
10	777073	777518	447	Heterozygous	LD	LDX	LDX
10	794135	794267	134	Heterozygous	No association detected	LDX	LDX
10	857328	857655	329	Heterozygous	LD	LDX	LDX
10	930845	931638	795	Heterozygous	LD	LDX	LDX
10	1151488	1152516	1030	LD	LD	LDX	LDX
10	1206008	1206419	413	LD	LD	LDX	LDX
10	1457418	1457641	225	LD	LD	LDX	LDX
10	1654457	1656162	1707	LD	LD	LDX	LDX
10	1657850	1658207	359	LD	LD	LDX	LDX
10	1954943	1955171	230	LD	LD	LDX	LDX
10	1998902	1999109	209	LD	LD	LDX	LDX
10	2050451	2051105	656	LD	LD	LDX	LDX
10	2134991	2135294	305	LD	LD	LDX	LDX
10	2170943	2171321	380	LD	LD	LDX	LDX
10	2505887	2506501	616	LD	LD	LDX	LDX
10	2515086	2515550	466	LD	LD	LDX	LD
10	2810189	2810662	475	LD	LD	LDX	LDX
10	3087747	3088286	541	LD	LD	LDX	LDX
10	3231309	3231468	161	LD	LD	LDX	LDX
10	3376181	3376372	193	LD	LD	LDX	LDX
10	3464933	3465131	200	LD	LD	LDX	LD
10	3635958	3636272	316	LD	LD	LDX	LDX
10	3824080	3824242	164	LD	LD	LDX	No association detected
10	3888812	3888950	140	LD	LD	LDX	LDX
10	4437438	4437693	257	LD	LD	N/D	LD
10	5151879	5151954	77	LD	LD	N/D	LD
10	5581582	5581918	338	LD	LD	N/D	LD
10	5808272	5808293	23	LD	LD	N/D	LD
10	6197644	6198026	384	LD	LD	LD	LD
10	6453059	6453363	306	LD	LD	LD	LD
10	6622809	6622988	181	LD	LD	LD	LD
10	6781704	6782090	388	LD	LD	LD	LD
10	7142899	7143474	577	LD	No association detected	LD	No association detected
10	7245138	7245362	226	LD	LD	LD	LD
10	7321389	7322134	747	LD	LDX	LD	LD
10	7440065	7440278	215	LD	No association detected	LD	No association detected
10	7491958	7492355	399	LD	LD	LD	LD
10	7493310	7493512	204	LD	LD	LD	LD
10	7623761	7624338	579	LD	LD	LD	LD
10	8635837	8636021	186	LD	LD	LD	LD
10	9025946	9026084	140	LD	LD	LD	No association detected
10	9439163	9439342	181	LD	LD	LD	LD
10	9468283	9468700	419	LD	LD	LD	LD
10	9841451	9841573	124	LD	N/D	LD	N/D
10	9868262	9868303	43	LD	LD	LD	LD
10	9996286	9996671	387	LD	LD	LD	LD
10	10294177	10294414	239	LD	LD	LD	LD
10	10302135	10302522	389	LD	LD	LD	LD
10	10368645	10368945	302	LD	N/D	LD	N/D
10	10869608	10869891	285	LD	LD	LD	LD
10	10949968	10950463	497	LD	LD	LD	LD
10	10959740	10960446	708	LD	LD	LD	LD
10	11253235	11253471	238	LD	LD	LD	LD
10	11330877	11331227	352	LD	LD	LD	LD
10	11941193	11941810	619	LD	LD	LD	LD
10	12450804	12450828	26	LD	LD	LD	LD
10	12778957	12779436	481	LD	LD	LD	LD
10	13256423	13257723	1302	LD	LD	LD	LD
10	13368668	13369108	442	LD	LD	LD	LD
10	14908821	14909349	530	LD	LD	LD	LD
10	15139706	15139814	110	LD	LD	LD	LD
10	15619356	15619527	173	LD	LDX	LD	LDX
10	16769992	16770367	377	Heterozygous	LD	Heterozygous	LD
10	17151656	17152206	552	LD	No association detected	LD	No association detected
10	17374772	17375098	328	LD	LD	LD	LD
10	17574427	17574625	200	LD	LD	LD	LD
10	17611871	17611946	77	LD	LDX	LD	LDX
10	17887014	17887060	48	LD	LD	LD	LD
10	18342648	18343499	853	LD	LD	LD	LD
10	18807080	18807641	563	LD	LD	LD	LD
10	19788032	19788394	364	LD	LD	LD	LD
10	19804092	19805590	1500	LD	LD	LD	LD
10	20860832	20861430	600	LD	LD	LD	LD
10	22346218	22346652	436	LD	LD	LD	LD
10	22805996	22806533	539	LD	LD	LD	LD
10	26111740	26111995	257	Heterozygous	LD	LD	LD
10	26389011	26390201	1192	Heterozygous	LD	LD	LD
10	26487571	26487624	55	Heterozygous	LD	LD	LD
10	27572473	27572921	450	N/D	LDX	LD	LD
10	27747027	27747447	422	N/D	LD	LD	LD
10	27963088	27963776	690	N/D	LD	LD	No association detected
10	28029324	28029360	38	LD	LD	LD	LD
10	28205421	28205588	169	LD	No association detected	LD	LD
10	28507646	28508013	369	LD	No association detected	LD	LD
10	28879902	28880048	148	LD	No association detected	LD	LD
10	28902382	28902459	79	LD	LD	LD	LD
10	28907071	28907872	803	LD	LD	LD	LD
10	29566739	29566978	241	N/D	No association detected	N/D	No association detected
10	29950417	29950947	532	N/D	LD	N/D	LD
10	30138178	30138673	497	N/D	LD	N/D	LD
10	30166401	30166652	253	N/D	No association detected	N/D	No association detected
10	30386686	30387481	797	N/D	No association detected	N/D	No association detected
10	30492150	30492388	240	N/D	LD	N/D	LD
10	30592101	30592763	664	N/D	LD	N/D	LD
10	31146944	31147224	282	N/D	LD	N/D	LD
10	31739785	31741031	1248	N/D	LD	N/D	LD
10	32027252	32027648	398	N/D	LD	Heterozygous	LD
10	32501895	32501971	78	N/D	LD	Heterozygous	LD
10	32510349	32510692	345	N/D	LD	Heterozygous	LD
10	33446865	33447507	644	N/D	LD	Heterozygous	LD
10	33596031	33596536	507	N/D	LD	Heterozygous	LD
10	33738312	33738991	681	N/D	LD	Heterozygous	LD
10	34085480	34085538	60	Heterozygous	No association detected	Heterozygous	No association detected
10	34314384	34314570	188	Heterozygous	LD	Heterozygous	LD
10	34420074	34420240	168	Heterozygous	LD	Heterozygous	LD
10	34548687	34548716	31	Heterozygous	LD	Heterozygous	LD
10	34846957	34847769	814	Heterozygous	LD	Heterozygous	LD
10	34847971	34848295	326	Heterozygous	LD	Heterozygous	LD
10	34959433	34959699	268	Heterozygous	LD	Heterozygous	LD
10	35193587	35193745	160	LD	LD	LD	LD
10	35349890	35349922	34	LD	LD	LD	LD
10	35499646	35499786	142	LD	LD	LD	LD
10	35918643	35919181	540	LD	LD	LD	LD
10	36233038	36233241	205	LD	LD	LD	LD
10	36441487	36441702	217	LD	LD	LD	No association detected
10	36503947	36505061	1116	LD	LD	LD	LD
10	36634505	36635011	508	LD	LD	LD	LD
10	36899007	36899487	482	LD	LD	LD	LD
10	36955086	36955129	45	LD	LD	LD	LD
10	36967534	36968081	549	LD	LD	LD	LD
10	37035284	37036016	734	LD	No association detected	LD	No association detected
10	37052184	37052351	169	LD	LD	LD	LD
10	37132170	37132403	235	LD	LD	LD	LD
10	37217163	37217366	205	LD	LD	LD	LD
10	37476170	37476621	453	LD	LD	LD	LD
10	37517584	37518906	1324	LD	LD	LD	LD
10	37556768	37557262	496	LD	LD	LD	LD
10	37616266	37616341	77	LD	No association detected	LD	No association detected
10	37859080	37859444	366	LD	LD	LD	LD
10	37932472	37933060	590	LD	LDX	LD	LD
10	38330860	38331215	357	LD	LD	LD	No association detected
10	38471525	38471786	263	LD	LD	LD	LD
10	38678226	38678365	141	LD	LD	LD	LD
10	39100090	39100249	161	LD	LD	LD	LD
10	39628467	39628806	341	LD	LD	LD	LD
10	40016808	40016853	47	LD	N/D	LD	N/D
10	40463473	40464291	820	LD	LD	LD	LD
10	40776031	40776974	945	LD	No association detected	LD	No association detected
10	40985995	40986217	224	LD	LD	LD	LD
10	41019286	41019776	492	LD	LD	LD	LD
10	41814844	41814997	155	LD	LDX	LD	LDX
10	42095727	42096317	592	LD	LD	LD	LD
10	42340904	42341722	820	LD	No association detected	LD	LD
10	42383232	42383713	483	LD	LD	LD	LD
10	42698511	42698566	57	LD	No association detected	LD	No association detected
10	43092915	43093293	380	LD	LD	LD	LD
10	43617492	43618037	547	LD	LD	LD	LD
10	43815130	43815749	621	LD	LD	LD	LD
10	44071615	44072339	726	LD	LD	LD	LD
10	44094741	44094772	33	LD	LD	LD	LD
10	44415854	44416660	808	LD	LD	LD	LD
10	44449643	44450040	399	LD	LD	LD	LD
10	44472888	44473373	487	LD	LD	LD	LD
10	44532711	44532916	207	LD	LD	LD	LD
10	44642061	44642370	311	LD	LD	LD	LD
10	44656040	44656226	188	LD	LDX	LD	LD
10	44657461	44658365	906	LD	LDX	LD	LD
10	44853204	44853361	159	LD	No association detected	LD	LD
10	44870447	44871175	730	LD	LDX	LD	LD
10	44905844	44906224	382	LD	No association detected	LD	LD
10	44913740	44914034	296	LD	LDX	LD	LD
10	44917522	44917567	47	LD	LDX	LD	LD
10	45052770	45053421	653	LDX	LDX	LD	LD
10	45319292	45319413	123	LDX	No association detected	LD	LD
10	45384014	45384825	813	LDX	No association detected	LD	LD
10	45493545	45494521	978	LDX	No association detected	LD	LD
10	45590836	45591044	210	LDX	LDX	LD	LD
10	45657511	45657877	368	LDX	LDX	LD	LD
10	45669206	45670355	1151	LDX	LDX	LD	LD
10	45676495	45676974	481	LDX	LDX	LD	LD
10	45737404	45737616	214	LDX	LDX	LD	LD
10	45763271	45763455	186	LDX	LDX	LD	LD
10	45876356	45876510	156	LDX	LDX	LD	LD
10	46022387	46022424	39	LDX	LDX	LD	LD
10	46058031	46058918	889	LDX	LDX	LD	LD
10	47650983	47651060	79	LDX	LDX	LD	LD
10	47673631	47673686	57	LDX	LDX	LD	LD
10	47882487	47882888	403	LDX	LDX	LD	No association detected
10	47959980	47960200	222	LDX	No association detected	LD	LD
10	47995323	47995876	555	LDX	LDX	LD	LD
10	48041033	48041116	85	LDX	LDX	Heterozygous	No association detected
10	48275303	48275860	559	LDX	LDX	Heterozygous	LD
10	49367415	49367536	123	LDX	LDX	Heterozygous	No association detected
10	49468120	49468670	552	LDX	LDX	Heterozygous	LD
10	49571487	49572143	658	LDX	LDX	Heterozygous	No association detected
10	49855221	49855693	474	LDX	LDX	Heterozygous	No association detected
10	49870900	49870923	25	LDX	LDX	Heterozygous	LD
10	50052362	50054606	2246	LDX	LDX	Heterozygous	No association detected
10	50057493	50059111	1620	LDX	LDX	Heterozygous	LD
10	50322463	50323247	786	LDX	LDX	Heterozygous	No association detected
10	50521738	50522056	320	LDX	LDX	Heterozygous	No association detected
10	50620999	50621665	668	LDX	LDX	Heterozygous	LDX
10	50842417	50843096	681	LDX	LDX	Heterozygous	LDX
11	12151	12730	581	LDX	LDX	LD	LDX
11	13098	14124	1028	LDX	LDX	LD	LD
11	563937	564299	364	LDX	LDX	LD	LD
11	656061	656156	97	LDX	LDX	LD	LD
11	921600	921745	147	LDX	LDX	LD	LD
11	1066509	1067090	583	LDX	LDX	LD	LD
11	1096832	1097858	1028	LDX	LDX	LD	LD
11	1098524	1098707	185	LDX	LDX	LD	LD
11	1351035	1351719	686	LDX	LDX	LD	LD
11	1648398	1648564	168	LDX	LDX	LD	LD
11	1688919	1689034	117	LDX	LDX	LD	LD
11	1824758	1824916	160	LDX	LDX	LD	LD
11	2393019	2393559	542	LDX	LDX	LD	No association detected
11	2470848	2471605	759	LDX	LDX	LD	LD
11	2856307	2856569	264	LDX	LDX	LD	LDX
11	2865852	2866841	991	LDX	LDX	LD	No association detected
11	2868117	2868453	338	LDX	LDX	LD	LD
11	2868880	2869667	789	LDX	LDX	LD	No association detected
11	2962835	2963992	1159	LDX	LDX	LD	LD
11	3096137	3097310	1175	Heterozygous	LD	Heterozygous	LD
11	3663501	3663619	120	Heterozygous	LD	Heterozygous	LD
11	3810496	3810955	461	Heterozygous	LD	Heterozygous	LD
11	4874288	4874436	150	Heterozygous	LD	Heterozygous	LD
11	4937280	4938057	779	Heterozygous	LD	Heterozygous	LD
11	5668523	5668630	109	LD	No association detected	LD	No association detected
11	5743149	5743364	217	LD	LD	LD	LD
11	5753623	5754211	590	LD	LD	LD	LD
11	5761097	5761245	150	LD	No association detected	LD	No association detected
11	5788517	5789587	1072	LD	LD	LD	LD
11	6853713	6855258	1547	LD	LD	LD	LD
11	7053144	7053478	336	LD	LD	LD	LD
11	7290574	7291513	941	LD	LD	LD	LD
11	7335472	7335951	481	LD	LD	LD	LD
11	7785723	7786297	576	LD	LD	LD	LD
11	8011803	8012031	230	LD	LD	LD	LD
11	8437859	8438242	385	LD	LD	LD	LD
11	8449474	8449867	395	LD	LD	LD	LD
11	8466334	8466821	489	LD	LD	LD	LD
11	8596733	8597550	819	LD	LD	LD	No association detected
11	9150913	9150997	86	LD	LD	LDX	LDX
11	9188024	9188698	676	LD	No association detected	LDX	LDX
11	9383857	9383956	101	LD	LD	LDX	LDX
11	9472147	9472363	218	LD	LD	LDX	LDX
11	9505369	9505440	73	LD	LD	LDX	No association detected
11	9547436	9547938	504	LD	LD	LDX	LDX
11	9606343	9606676	335	LD	LD	LDX	LDX
11	10072551	10073030	481	LD	LD	LDX	LDX
11	10114622	10114700	80	LD	N/D	LDX	LDX
11	10306831	10307767	938	LD	LD	LDX	LDX
11	10317751	10318373	624	LD	LD	LDX	LDX
11	10775004	10775237	235	LD	LD	LDX	LDX
11	10931992	10932349	359	LD	LD	LDX	LDX
11	11094616	11094681	67	LD	LD	LDX	LDX
11	11115490	11115637	149	LD	LD	LDX	LDX
11	11195586	11196336	752	LD	LD	LDX	LDX
11	11243698	11244145	449	LD	LD	LDX	LDX
11	11409393	11410017	626	LD	LD	LDX	LDX
11	11484063	11484973	912	LD	LD	LDX	LDX
11	11499213	11499251	40	LD	LD	LDX	LD
11	12326469	12326914	447	N/D	LD	LDX	LDX
11	12527607	12527785	180	N/D	LDX	LDX	LDX
11	13962062	13962171	111	N/D	LD	LDX	LDX
11	14364665	14365387	724	Heterozygous	LD	LDX	LDX
11	14573596	14574906	1312	Heterozygous	LD	LDX	LDX
11	14660401	14660873	474	Heterozygous	LD	LDX	LDX
11	14748036	14748164	130	Heterozygous	LD	LDX	No association detected
11	14911503	14911942	441	Heterozygous	LD	LDX	LDX
11	14979508	14979528	22	Heterozygous	LD	LDX	LDX
11	15076872	15077442	572	LD	LD	LDX	LDX
11	15207589	15207795	208	LD	LD	LDX	LDX
11	16273969	16274112	145	LDX	LDX	LDX	LDX
11	16446575	16446703	130	LDX	LDX	LDX	LDX
11	16662584	16663474	892	LDX	LDX	LDX	LDX
11	17107056	17107164	110	LDX	No association detected	LDX	LDX
11	17197000	17197397	399	LDX	LDX	LDX	LDX
11	17197812	17198347	537	LDX	LDX	LDX	LDX
11	17205497	17206372	877	LDX	LDX	LDX	LDX
11	17392563	17393018	457	LDX	LD	LDX	LD
11	17443251	17443424	175	LDX	LDX	LDX	LDX
11	17445699	17446141	444	LDX	LDX	LDX	LDX
11	17459811	17460403	594	LDX	LDX	LDX	No association detected
11	17609748	17609936	190	LDX	LDX	LDX	LDX
11	17997282	17997542	262	LDX	LDX	LDX	LDX
11	18503717	18504078	363	LDX	LDX	LDX	LD
11	18876718	18877041	325	LDX	LDX	LDX	LDX
11	18894922	18895162	242	LDX	LDX	LDX	LDX
11	19164600	19164930	332	LDX	LDX	LDX	LDX
11	24343795	24343953	160	LDX	LDX	LDX	LDX
11	24560576	24560796	222	LDX	LDX	LDX	LDX
11	24818507	24818639	134	LDX	LDX	LDX	LDX
11	25088828	25089178	352	Heterozygous	No association detected	Heterozygous	No association detected
11	25916204	25916219	17	Heterozygous	No association detected	Heterozygous	No association detected
11	26561267	26561725	460	LDX	LDX	LDX	LDX
11	27737792	27737821	31	LDX	LDX	LDX	LDX
11	29648982	29649069	89	LDX	LDX	LDX	LDX
11	29864940	29865011	73	LDX	LDX	LDX	LDX
11	29991197	29991987	792	LDX	LD	LDX	LDX
11	30192753	30192918	167	LDX	LDX	LDX	LDX
11	30900712	30901062	352	LDX	No association detected	LDX	No association detected
11	31133101	31133465	366	Heterozygous	LDX	LDX	LDX
11	31745045	31745191	148	Heterozygous	LDX	LDX	LDX
11	32320804	32320960	158	LDX	LDX	LDX	LDX
11	32550891	32552020	1131	LDX	LDX	LDX	LDX
11	33028577	33028771	196	LDX	LDX	Heterozygous	LDX
11	33200266	33200851	587	LDX	LDX	Heterozygous	LDX
11	33201324	33202086	764	LDX	LDX	Heterozygous	LDX
11	33359010	33359504	496	LDX	LDX	Heterozygous	LDX
11	34019919	34020234	317	LDX	No association detected	LDX	LDX
11	34218054	34218641	589	LDX	LDX	LDX	LDX
11	34724997	34725619	624	LDX	LDX	LDX	LDX
11	34862331	34862665	336	LDX	LDX	LDX	LDX
11	35272068	35272123	57	LDX	LDX	LDX	LDX
11	35304097	35304764	669	LDX	LDX	LDX	LDX
11	35754822	35755516	696	LDX	LD	LDX	LDX
11	37054254	37054345	93	Heterozygous	LDX	LDX	No association detected
11	37074243	37074772	531	Heterozygous	LD	LDX	LDX
11	37115358	37116170	814	Heterozygous	No association detected	LDX	LDX
11	37399146	37399218	74	Heterozygous	No association detected	LDX	LD
11	37665916	37666333	419	Heterozygous	LDX	LDX	LDX
11	37685716	37685846	132	Heterozygous	LD	LDX	LDX
11	37943869	37944324	457	Heterozygous	LD	LDX	LDX
11	38060373	38060423	52	LD	LD	LDX	LDX
11	38126009	38126504	497	LD	LD	LDX	LDX
11	38322098	38322148	52	LD	LD	LDX	LDX
11	38346869	38347162	295	LD	LD	LDX	LDX
11	38358491	38359338	849	LD	LD	LDX	LDX
11	38422215	38422249	36	LD	LD	LDX	LDX
11	38442012	38442817	807	LD	LD	LDX	LDX
11	38516441	38516625	186	LD	LD	LDX	LDX
11	39072318	39072451	135	N/D	LD	N/D	LDX
12	320724	320982	260	N/D	LD	N/D	LDX
12	431003	432027	1026	N/D	LD	N/D	LDX
12	594621	594711	92	N/D	LD	N/D	No association detected
12	1355148	1355753	607	LD	LD	LDX	LDX
12	1555035	1555543	510	LD	LD	LDX	LDX
12	1603742	1603838	98	LD	LD	LDX	LDX
12	1622327	1622417	92	LD	LD	LDX	LDX
12	2055011	2055205	196	LD	LD	LD	LDX
12	2155200	2155929	731	LD	LD	LD	LDX
12	2157839	2158419	582	LD	LD	LD	LDX
12	2474212	2474922	712	LD	LD	LD	LD
12	2875513	2876147	636	LD	LD	LD	LD
12	3077442	3077717	277	LD	LD	LD	LD
12	3185062	3185576	516	LD	LD	LD	LD
12	3386761	3387209	450	LD	LD	LD	LD
12	3517671	3517814	145	LD	LD	LD	LD
12	3615807	3615880	75	LD	LD	LD	LD
12	3663273	3663569	298	LD	LD	LD	LD
12	3664507	3664895	390	LD	LD	LD	LD
12	3694305	3694569	266	LD	LD	LD	LD
12	3718345	3719090	747	LD	LD	LD	LD
12	3754844	3756104	1262	LD	LD	LD	LD
12	3765983	3766859	878	LD	LD	LD	LD
12	3983833	3984365	534	LD	LD	LD	LD
12	4318999	4319088	91	N/D	LD	LD	LDX
12	4365584	4365629	47	N/D	LD	LD	LD
12	4813569	4813906	339	N/D	No association detected	LD	No association detected
12	5213235	5213857	624	N/D	LD	LD	LD
12	5219835	5220832	999	N/D	LD	LD	LD
12	5375339	5375563	226	N/D	LD	LD	LD
12	5627710	5628262	554	N/D	LD	LD	LD
12	5784899	5786024	1127	N/D	LD	LD	LD
12	5807966	5807978	14	N/D	LD	LD	LD
12	5811230	5812552	1324	N/D	LD	LD	LD
12	5828379	5828711	334	N/D	LD	LD	LD
12	5981930	5982941	1013	N/D	LD	LD	LD
12	6089582	6090417	837	Heterozygous	LD	LD	LD
12	6091063	6091470	409	Heterozygous	LD	LD	LD
12	6240147	6240214	69	Heterozygous	LD	LD	LD
12	6241747	6241818	73	Heterozygous	LD	LD	LD
12	6242631	6243097	468	Heterozygous	LD	LD	LD
12	6506126	6506724	600	Heterozygous	LDX	LD	LD
12	6565682	6565781	101	Heterozygous	No association detected	LD	LD
12	6738032	6738442	412	Heterozygous	LD	LD	LD
12	7262832	7263030	200	LDX	N/D	LD	N/D
12	7322864	7322939	77	LDX	No association detected	LD	LD
12	7354490	7355557	1069	LDX	LDX	LD	LD
12	7392711	7393158	449	LDX	LDX	LD	N/D
12	8289623	8290027	406	LDX	LDX	LD	LD
12	8374356	8374708	354	LDX	LDX	LD	LDX
12	8495058	8495800	744	LDX	LDX	LD	LD
12	8988687	8989119	434	LDX	No association detected	LD	LD
12	9049202	9049507	307	Heterozygous	LDX	LD	LD
12	9821613	9821716	105	Heterozygous	No association detected	LD	LD
12	9859231	9860062	833	Heterozygous	LDX	LD	LD
12	10530626	10530701	77	LD	No association detected	LD	LD
12	10535762	10536466	706	LD	No association detected	LD	LD
12	10688173	10688549	378	LD	No association detected	LD	LD
12	10724979	10725198	221	LD	LDX	LD	LDX
12	11017549	11018589	1042	Heterozygous	No association detected	LD	LD
12	11312014	11312495	483	Heterozygous	No association detected	LD	LD
12	11312854	11313577	725	Heterozygous	No association detected	LD	LD
12	11559846	11560601	757	Heterozygous	LD	LD	LD
12	11882757	11883267	512	Heterozygous	No association detected	LD	LD
12	12247868	12248129	263	Heterozygous	No association detected	LD	LD
12	12534922	12535446	526	Heterozygous	No association detected	LD	LD
12	12675943	12676463	522	Heterozygous	No association detected	LD	LD
12	12743778	12744148	372	Heterozygous	No association detected	LD	LD
12	12850609	12851057	450	Heterozygous	LD	LD	LD
12	13317670	13318036	368	Heterozygous	LD	LD	LD
12	13421982	13422198	218	Heterozygous	No association detected	LD	LD
12	13430731	13431340	611	Heterozygous	No association detected	LD	LD
12	13612498	13613384	888	Heterozygous	No association detected	LD	No association detected
12	13620080	13620657	579	Heterozygous	No association detected	LD	LD
12	13620753	13621568	817	Heterozygous	No association detected	LD	LD
12	13652647	13653359	714	Heterozygous	No association detected	LD	LD
12	13707105	13707402	299	Heterozygous	LDX	LD	LDX
12	13717617	13717956	341	Heterozygous	No association detected	LD	LD
12	13736037	13737645	1610	Heterozygous	No association detected	LD	LD
12	13960531	13960929	400	Heterozygous	No association detected	LD	LD
12	14199999	14200543	546	LD	No association detected	LD	LD
12	14401705	14402050	347	LD	LD	LD	LD
12	15394462	15394860	400	LD	No association detected	LD	LD
12	15404307	15404533	228	LD	No association detected	LD	LD
12	16434545	16435029	486	LD	LD	LD	LD
12	17475354	17475896	544	LD	No association detected	LD	LD
12	17985559	17985812	255	LD	LD	LD	LD
12	18004773	18005317	546	LD	LD	LD	LD
12	20049409	20049497	90	N/D	No association detected	LD	LD
12	22346686	22346817	133	Heterozygous	No association detected	LD	No association detected
12	22378564	22378883	321	Heterozygous	No association detected	LD	No association detected
12	24013981	24014521	542	Heterozygous	LDX	LD	LD
12	24020428	24020980	554	Heterozygous	No association detected	LD	LD
12	24239308	24239826	520	Heterozygous	No association detected	LD	LD
12	25906960	25907435	477	Heterozygous	No association detected	LD	LD
12	26012546	26013027	483	Heterozygous	No association detected	Heterozygous	LD
12	26512947	26513210	265	Heterozygous	No association detected	Heterozygous	LD
12	27896327	27896720	395	Heterozygous	LDX	N/D	LDX
12	28861335	28861896	563	Heterozygous	No association detected	LD	LD
12	29832810	29833419	611	Heterozygous	No association detected	Heterozygous	LD
12	30699009	30699363	356	Heterozygous	No association detected	LD	LD
12	30730775	30731281	508	Heterozygous	No association detected	LD	LD
12	31952896	31953603	709	Heterozygous	No association detected	LD	LD
12	32235307	32235411	106	LDX	LDX	Heterozygous	LD
12	32248102	32248194	94	LDX	LDX	Heterozygous	LD
12	32441075	32441442	369	LDX	LDX	Heterozygous	LD
12	32497193	32497254	63	LDX	No association detected	Heterozygous	LD
12	32519849	32519951	104	LDX	LDX	Heterozygous	LD
12	32682317	32682723	408	LDX	LDX	Heterozygous	LD
12	32863117	32863505	390	LDX	LDX	Heterozygous	LD
12	33087254	33087400	148	LDX	LDX	LD	LD
12	33359402	33359499	99	LDX	LDX	LD	LD
12	34095130	34095362	234	LDX	No association detected	LD	LD
12	34309815	34310354	541	LDX	LDX	LD	LD
12	35102042	35102974	934	LDX	LDX	LD	LD
12	35380454	35381518	1066	LDX	LDX	LD	LD
12	35471495	35471589	96	LDX	LDX	LD	LD
12	35477144	35477264	122	LDX	LDX	LD	LD
12	35581031	35581211	182	LDX	LDX	LD	LD
12	36131660	36131691	33	LDX	LDX	LDX	LD
12	36464083	36464169	88	LDX	LDX	LDX	LDX
12	36618425	36619161	738	LDX	LDX	LDX	LDX
12	36989400	36989778	380	LDX	LDX	LDX	LDX
12	37039575	37039718	145	Heterozygous	LD	LDX	LDX
12	37227715	37228097	384	Heterozygous	No association detected	LDX	LDX
12	37325992	37327080	1090	Heterozygous	No association detected	LDX	LDX
12	37481869	37481900	33	Heterozygous	No association detected	LDX	LDX
12	37860761	37861887	1128	Heterozygous	LDX	LDX	LDX
12	37908463	37908687	226	Heterozygous	LDX	LDX	No association detected
12	38302994	38303067	75	Heterozygous	No association detected	LDX	LDX
12	38335856	38336034	180	Heterozygous	No association detected	LDX	LDX
12	38438259	38438583	326	Heterozygous	No association detected	LDX	LDX
12	38460793	38460930	139	Heterozygous	No association detected	LDX	LDX
12	38514170	38514790	622	Heterozygous	No association detected	LDX	LDX
12	38704577	38705179	604	Heterozygous	LDX	LDX	LDX
12	39573890	39575312	1424	N/D	LD	N/D	LDX
12	39577561	39578184	625	N/D	No association detected	N/D	LDX
12	39641404	39642109	707	N/D	LDX	N/D	LDX
12	39872633	39872683	52	N/D	No association detected	N/D	LDX
[truncated: 1,245 more rows]

## Sheet: Supplemental Table 6
Supplementary Table 5 - A summary of C-DMRs, their methylation levels in each genotype, and their segregation patterns
Note: the coordinate is 0-base and the start and end positions are inclusive
N/D = Not detectable
Chromosome	Start	End	Size	Genotype in R-11268	Methylation Pattern Segregation in R-11268	Genotype in R-11272	Methylation Pattern Segregation in R-11272
1	477136	478494	1360	LD	LD	LDX	LDX
1	1601788	1604861	3075	LD	LD	LDX	LDX
1	1662548	1663198	652	LD	LD	LDX	LDX
1	2042253	2043575	1324	LD	LD	LDX	LDX
1	2483823	2484606	785	LD	LD	LDX	LDX
1	2484657	2484818	163	LD	LD	LDX	LDX
1	2773328	2773521	195	LD	N/D	LDX	LD
1	3261204	3262067	865	Heterozygous	LD	LDX	LDX
1	3271973	3272526	555	Heterozygous	LD	LDX	LDX
1	3677243	3677645	404	Heterozygous	LDX	LDX	LDX
1	3740998	3743357	2361	Heterozygous	LDX	LDX	LDX
1	4119894	4120448	556	Heterozygous	LDX	LDX	LDX
1	4556416	4557165	751	Heterozygous	LDX	LDX	LDX
1	4693249	4694779	1532	Heterozygous	LDX	LDX	LDX
1	4772472	4774088	1618	Heterozygous	LD	LDX	LD
1	4774829	4776085	1258	Heterozygous	LDX	LDX	LD
1	4777287	4778539	1254	Heterozygous	LDX	LDX	LD
1	5456420	5456762	344	Heterozygous	LDX	N/D	LD
1	8381455	8383676	2223	Heterozygous	LDX	Heterozygous	LD
1	9453109	9453418	311	Heterozygous	LDX	LD	LD
1	9843295	9844095	802	Heterozygous	LDX	LD	LD
1	11128532	11130036	1506	LDX	LDX	Heterozygous	LD
1	11292319	11292844	527	LDX	LDX	Heterozygous	LD
1	12091287	12092303	1018	LDX	LD	Heterozygous	LD
1	12254282	12254949	669	LDX	LD	Heterozygous	LD
1	12740015	12741415	1402	LDX	LDX	Heterozygous	LD
1	14249238	14249811	575	LDX	LDX	Heterozygous	LD
1	17980548	17981384	838	N/D	LD	Heterozygous	LD
1	23131018	23132867	1851	Heterozygous	LDX	N/D	LD
1	26214578	26214944	368	Heterozygous	LDX	N/D	LD
1	27115399	27116321	924	Heterozygous	LD	Heterozygous	LD
1	28508123	28508394	273	Heterozygous	LDX	Heterozygous	LDX
1	29272848	29276617	3771	Heterozygous	LDX	Heterozygous	LD
1	29507124	29508091	969	Heterozygous	LDX	Heterozygous	LD
1	29713466	29714033	569	Heterozygous	LDX	Heterozygous	LD
1	31067870	31068070	202	Heterozygous	LDX	N/D	LD
1	32242391	32243872	1483	Heterozygous	LDX	N/D	LD
1	34354250	34354705	457	Heterozygous	LDX	N/D	LD
1	36696016	36697412	1398	Heterozygous	LD	LD	LD
1	36702736	36703751	1017	Heterozygous	LDX	LD	LD
1	37094529	37095137	610	Heterozygous	LDX	LD	LD
1	37623328	37623687	361	Heterozygous	LDX	LD	LD
1	37634325	37635763	1440	Heterozygous	LDX	LD	LD
1	37909880	37911753	1875	Heterozygous	LDX	LD	LD
1	38734326	38734793	469	Heterozygous	LDX	LD	LD
1	38981370	38982147	779	Heterozygous	LDX	LD	LD
1	39198869	39199480	613	Heterozygous	LDX	LD	LD
1	39200424	39202501	2079	Heterozygous	LDX	LD	LD
1	39265900	39266694	796	Heterozygous	LD	LD	LD
1	39317110	39318463	1355	Heterozygous	LDX	LD	LD
1	39978258	39978640	384	Heterozygous	LDX	LD	LD
1	40064338	40065907	1571	Heterozygous	LDX	Heterozygous	LD
1	40997203	41000396	3195	Heterozygous	LDX	Heterozygous	LD
1	41457107	41457952	847	Heterozygous	LDX	Heterozygous	LD
1	41621800	41622879	1081	Heterozygous	LDX	Heterozygous	LD
1	42167196	42168453	1259	Heterozygous	LDX	Heterozygous	LD
1	42247131	42247978	849	Heterozygous	LDX	Heterozygous	LD
1	42275538	42277299	1763	Heterozygous	LDX	Heterozygous	LD
1	43663500	43663912	414	Heterozygous	LDX	Heterozygous	LD
1	43674413	43676132	1721	Heterozygous	LDX	Heterozygous	LD
1	43687550	43687937	389	Heterozygous	LD	Heterozygous	LD
1	43953189	43954884	1697	Heterozygous	LDX	Heterozygous	LD
1	43955442	43956358	918	Heterozygous	LDX	Heterozygous	LD
1	44401879	44402246	369	Heterozygous	LD	LD	LD
1	44461228	44461897	671	Heterozygous	LDX	LD	LD
1	44780606	44781056	452	Heterozygous	LDX	LD	LD
1	46423708	46424119	413	N/D	LDX	LD	LD
1	48348923	48349837	916	Heterozygous	LDX	LD	LD
1	48477138	48478039	903	Heterozygous	LDX	LD	LD
1	49315711	49315900	191	LD	LD	LD	LD
1	49320958	49321633	677	LD	LD	LD	LD
1	49570479	49571257	780	LD	LD	LD	LD
1	49992292	49992636	346	LD	LD	LD	LD
1	55257575	55257973	400	LD	LDX	LD	LD
1	55420018	55421158	1142	LD	LD	LD	LD
2	457709	458531	824	LDX	LDX	LDX	LDX
2	1434182	1435276	1096	LDX	LDX	LDX	LDX
2	4215187	4216073	888	LD	LD	LDX	LDX
2	4758597	4758901	306	LD	LD	LDX	LDX
2	5835339	5836782	1445	LD	LD	LDX	LDX
2	6356063	6356692	631	LD	LD	Heterozygous	LDX
2	8292599	8294651	2054	LD	LD	LD	LD
2	8692023	8692517	496	LD	LD	LD	LD
2	9143437	9146323	2888	LD	LD	LD	LD
2	9146353	9146682	331	LD	LD	LD	LD
2	9151854	9153357	1505	LD	LD	LD	LD
2	9158286	9160908	2624	LD	LD	LD	LD
2	9290967	9292100	1135	LD	LD	LD	LD
2	9777220	9778535	1317	LD	LD	LD	LD
2	9779233	9782233	3002	LD	LD	LD	LD
2	10028646	10029613	969	LD	LD	LD	LD
2	11664475	11665537	1064	LD	LD	LD	LD
2	12897371	12897864	495	LD	LD	LD	LD
2	13094737	13095149	414	LDX	LD	LD	LD
2	14408295	14408732	439	Heterozygous	LDX	LD	LD
2	14408734	14408976	244	Heterozygous	LDX	LD	LD
2	15756443	15758146	1705	LD	LD	LD	LD
2	16100498	16101754	1258	LD	LD	LD	LD
2	16188856	16190132	1278	LD	LD	LD	LD
2	18929141	18929950	811	LD	LD	LD	LD
2	19306154	19308620	2468	LD	LD	LD	LD
2	20236581	20237058	479	LD	LD	LD	LD
2	21543259	21544248	991	LD	LD	LD	LD
2	26832998	26833518	522	LD	LDX	Heterozygous	LDX
2	27432065	27433474	1411	LD	LD	LD	LD
2	27844396	27845211	817	LD	LD	LD	LD
2	29277109	29278447	1340	LD	LD	LD	LD
2	29840727	29841316	591	LD	LD	LD	LD
2	29987283	29987635	354	LD	LD	LD	LD
2	30236088	30237967	1881	LD	LD	LD	LD
2	30248604	30251938	3336	LD	LD	LD	LD
2	30413939	30415127	1190	LD	LD	LD	LD
2	30491136	30491735	601	LD	LDX	LD	LDX
2	30554439	30555208	771	LD	LD	LD	LD
2	30558867	30560214	1349	LD	LD	LD	LD
2	30732846	30734349	1505	LD	LD	LD	LD
2	30815812	30817929	2119	LD	LD	LD	LD
2	31125107	31126008	903	Heterozygous	LD	Heterozygous	LD
2	31943692	31945204	1514	Heterozygous	LD	Heterozygous	LD
2	33514243	33514827	586	LD	LD	LD	LD
2	34090374	34091441	1069	LD	LD	LD	LD
2	35086406	35087800	1396	LD	LD	LD	LD
2	35118807	35119675	870	LD	LD	LD	LDX
2	35498206	35498984	780	LD	LD	LD	LD
2	35977956	35979489	1535	LD	LD	LD	LD
2	36442343	36444225	1884	LD	LD	LD	LD
2	37115221	37115346	127	LD	LD	LD	LD
2	37162626	37164361	1737	LD	LD	LD	LD
2	37662745	37663356	613	LD	LD	LD	LD
2	37845635	37847462	1829	LD	LD	LD	LD
2	38728971	38732072	3103	LD	LD	LD	LD
2	39015805	39016594	791	LD	LD	LD	LD
2	39023599	39023954	357	LD	LD	LD	LD
2	39104340	39105381	1043	LD	LD	LD	LD
2	39445062	39445914	854	LD	LD	LD	LD
2	39821214	39822448	1236	LD	LD	LD	LD
2	39940403	39941056	655	LD	LD	LD	LD
2	40167719	40168523	806	LD	LD	LD	LD
2	40261355	40262225	872	LD	LD	LD	LD
2	40301225	40301890	667	LD	LD	LD	LD
2	40320646	40321492	848	LD	LD	LD	LD
2	40553146	40554871	1727	LD	LD	LD	LD
2	40724603	40726118	1517	LD	LD	LD	LD
2	40739851	40740742	893	LD	LD	LD	LD
2	40795238	40800346	5110	LD	LD	LD	LD
2	40941522	40942646	1126	LD	LD	LD	LD
2	41158801	41159978	1179	LD	LD	Heterozygous	LD
2	41439593	41440606	1015	LD	LD	Heterozygous	LD
2	41660521	41662288	1769	LD	LD	Heterozygous	LDX
2	41662597	41663818	1223	LD	LD	Heterozygous	LD
2	41709634	41710842	1210	LD	LD	Heterozygous	LDX
2	41724111	41725476	1367	LD	LD	Heterozygous	LD
2	41974200	41975186	988	LD	LD	Heterozygous	LDX
2	41976350	41977349	1001	LD	LD	Heterozygous	LDX
2	42992469	42993773	1306	LD	LD	LD	LDX
2	43249733	43250129	398	LD	LD	Heterozygous	LDX
2	43250131	43250770	641	LD	LD	Heterozygous	LDX
2	43250839	43251174	337	LD	LD	Heterozygous	LDX
2	43251176	43251622	448	LD	LD	Heterozygous	LDX
2	43251741	43251946	207	LD	LD	Heterozygous	LDX
2	43252379	43253612	1235	LD	LD	Heterozygous	LDX
2	43253615	43254296	683	LD	LD	Heterozygous	LDX
2	43254311	43255380	1071	LD	LD	Heterozygous	LDX
2	43255402	43255942	542	LD	LD	Heterozygous	LDX
2	43255994	43256187	195	LD	LD	Heterozygous	LDX
2	43395128	43396792	1666	LD	LD	Heterozygous	LD
2	43740600	43741625	1027	LD	LD	Heterozygous	LDX
2	51652994	51654759	1767	N/D	LDX	N/D	LDX
3	27464	28066	604	Heterozygous	LD	LDX	LDX
3	65881	66228	349	Heterozygous	LD	LDX	LDX
3	66233	66414	183	Heterozygous	LD	LDX	LDX
3	520260	521216	958	Heterozygous	LD	LDX	LDX
3	3327225	3328166	943	Heterozygous	LDX	LD	LD
3	3489185	3489966	783	Heterozygous	LDX	LD	LD
3	4718057	4719471	1416	Heterozygous	LDX	LD	LD
3	4878008	4878604	598	Heterozygous	LDX	LD	LD
3	5087745	5089008	1265	Heterozygous	LDX	LD	LD
3	5145017	5146480	1465	Heterozygous	LDX	LD	LD
3	5811126	5812300	1176	Heterozygous	LDX	LD	LD
3	5969096	5969838	744	Heterozygous	LD	LD	LD
3	6158452	6159073	623	LDX	LDX	LD	LD
3	6422905	6424153	1250	LDX	LDX	LD	LD
3	6431794	6432607	815	LDX	LDX	LD	LD
3	6480849	6481696	849	LDX	LDX	LD	LD
3	7010695	7013346	2653	Heterozygous	LDX	LD	LD
3	7027847	7029251	1406	Heterozygous	LDX	LD	LD
3	7086743	7087501	760	Heterozygous	LDX	LD	LD
3	7109510	7110780	1272	Heterozygous	LD	LD	LD
3	7653567	7653902	337	Heterozygous	LDX	LD	LD
3	7755673	7757404	1733	Heterozygous	LDX	LD	LD
3	8167214	8168995	1783	Heterozygous	LDX	LD	LD
3	8205162	8205992	832	Heterozygous	LDX	LD	LD
3	8569305	8570497	1194	Heterozygous	LDX	LD	LD
3	8577768	8579585	1819	Heterozygous	LDX	LD	LD
3	9088373	9091402	3031	Heterozygous	LDX	LD	LD
3	9235264	9236125	863	Heterozygous	LDX	LD	LD
3	9888234	9889548	1316	Heterozygous	LDX	LD	LD
3	10308050	10309784	1736	Heterozygous	LDX	LD	LD
3	10974654	10975854	1202	Heterozygous	LDX	LD	LD
3	11855068	11856176	1110	LDX	LDX	LD	LD
3	11891734	11891997	265	LDX	LDX	LD	LD
3	12153611	12155801	2192	LDX	LDX	LD	LD
3	12637641	12638210	571	LDX	LDX	LD	LD
3	12649448	12650819	1373	LDX	LDX	LD	LD
3	12713083	12714201	1120	LDX	LD	LD	LD
3	12759770	12761915	2147	LDX	LDX	LD	LD
3	12794034	12797196	3164	LDX	LDX	LD	LD
3	13226584	13228542	1960	LDX	LDX	LD	LD
3	13926819	13928017	1200	LDX	LDX	LD	LD
3	14542191	14542943	754	Heterozygous	LD	LD	LD
3	14998440	14998908	470	Heterozygous	LDX	LD	LD
3	15299520	15301308	1790	LDX	LDX	LD	LD
3	15360389	15361217	830	LDX	LD	LD	LD
3	17226746	17229015	2271	LD	LD	LD	LD
3	18610365	18611103	740	LD	LD	LD	LD
3	19273142	19273823	683	Heterozygous	LDX	LD	LD
3	20754023	20754381	360	Heterozygous	LDX	LD	LD
3	20815477	20816820	1345	Heterozygous	LDX	LD	LD
3	21061973	21062383	412	Heterozygous	LDX	LD	LD
3	21892623	21893194	573	Heterozygous	LDX	LD	LD
3	24976873	24978679	1808	LD	LD	Heterozygous	LD
3	25242601	25244277	1678	Heterozygous	LD	Heterozygous	LD
3	25244516	25244809	295	Heterozygous	LD	Heterozygous	LD
3	25932871	25935296	2427	Heterozygous	LD	Heterozygous	LD
3	26418688	26419257	571	LD	LD	Heterozygous	LD
3	27395882	27397936	2056	LD	LD	Heterozygous	LD
3	28001726	28002666	942	LD	LD	N/D	LD
3	31339021	31339146	127	Heterozygous	LD	LD	LD
3	32031739	32031931	194	N/D	LDX	LD	LD
3	32511674	32514222	2550	N/D	LDX	LD	LD
3	34547601	34547880	281	N/D	LDX	LD	LD
3	34745044	34745823	781	N/D	LDX	LD	LD
3	34913988	34916413	2427	N/D	LDX	LD	LD
3	35074295	35074966	673	LDX	LDX	LD	LD
3	35160635	35161817	1184	LDX	LDX	LD	LD
3	35415323	35416059	738	LDX	LDX	LD	LD
3	43521533	43522166	635	LDX	LDX	LD	LDX
3	44576200	44577204	1006	LDX	LD	LD	LD
3	44667749	44667907	160	LDX	LD	LD	LD
3	45938742	45940607	1867	LDX	LDX	LD	LD
3	46847318	46848053	737	LDX	LDX	LD	LD
4	24566	25808	1244	LD	LD	LDX	LDX
4	169690	170069	381	LD	LD	LDX	LD
4	640685	640875	192	LD	LD	LDX	LD
4	1646979	1648218	1241	LD	LD	LDX	LDX
4	2400927	2401513	588	LD	LD	LDX	LDX
4	4287305	4287467	164	LD	LD	LDX	LDX
4	4503956	4504826	872	LD	LD	LDX	LD
4	8264080	8264522	444	LD	LD	LD	LD
4	8275000	8276721	1723	LD	LD	LD	LD
4	8835144	8835774	632	LD	LD	LD	LD
4	9013704	9014437	735	LD	LD	LD	LD
4	9155643	9156095	454	LD	LD	LD	LD
4	9677045	9677568	525	LD	LD	LD	LD
4	10397265	10397538	275	LD	LD	LD	LD
4	10956439	10959165	2728	LD	LD	LD	LD
4	11016478	11017595	1119	LD	LD	LD	LD
4	11433520	11434016	498	LD	LD	LD	LD
4	11464002	11465516	1516	LD	LD	LD	LD
4	11618842	11620326	1486	LD	LD	LD	LD
4	11701239	11703823	2586	LD	LD	LD	LD
4	11714859	11715950	1093	LD	LD	LD	LD
4	11913307	11914163	858	LD	LD	LD	LD
4	11967555	11969888	2335	LD	LD	LD	LD
4	11970052	11975567	5517	LD	LD	LD	LD
4	13290085	13290763	680	LD	LD	LD	LD
4	13487638	13489023	1387	LD	LD	LD	LD
4	14445955	14446945	992	LD	LD	LD	LD
4	15308354	15309848	1496	LD	LD	LD	LD
4	15347180	15347561	383	LD	LD	LD	LD
4	15406081	15408534	2455	LD	LD	LD	LD
4	15518962	15519526	566	LD	LD	LD	LD
4	15950970	15951314	346	LD	LDX	LD	LDX
4	16011422	16012643	1223	LD	LD	LD	LD
4	16186942	16189108	2168	LD	LD	LD	LD
4	16612864	16614152	1290	LD	LD	LD	LD
4	16673981	16676862	2883	LD	LD	LD	LD
4	16861937	16863473	1538	LD	LD	LD	LD
4	16917849	16918730	883	LD	LD	LD	LD
4	17057180	17060661	3483	LD	LD	LD	LD
4	17416086	17416875	791	LD	LD	LD	LD
4	17473512	17474776	1266	LD	LD	LD	LD
4	18146915	18147724	811	LD	LD	LD	LD
4	18317228	18317589	363	LD	LDX	LD	LDX
4	18376426	18379088	2664	LD	LD	LD	LD
4	19145824	19146513	691	LD	LD	LD	LD
4	19180052	19181211	1161	LD	LD	LD	LD
4	19256229	19258485	2258	LD	LD	LD	LD
4	19582466	19583588	1124	LD	LD	LD	LD
4	22297764	22298956	1194	LD	LD	LD	LD
4	22301231	22302395	1166	LD	LD	LD	LD
4	24417386	24420266	2882	LD	LD	LD	LD
4	25091063	25092446	1385	LD	LD	LD	LD
4	27847428	27848481	1055	LD	LD	LD	LD
4	27943765	27945850	2087	LD	LD	LD	LD
4	31920050	31922224	2176	LD	LD	LD	LD
4	32009355	32011764	2411	LD	LD	LD	LD
4	33036828	33037833	1007	LD	LD	LD	LDX
4	33088461	33091320	2861	LD	LD	LD	LD
4	34126898	34127836	940	Heterozygous	LD	Heterozygous	LD
4	34137066	34137946	882	Heterozygous	LD	Heterozygous	LD
4	34505494	34506654	1162	Heterozygous	LD	Heterozygous	LD
4	35140161	35143134	2975	LD	LD	LD	LD
4	36428175	36429026	853	LD	LD	LD	LD
4	36838098	36838604	508	LD	LD	LD	LD
4	37596478	37598496	2020	LD	LD	LD	LD
4	37599110	37600603	1495	LD	LD	LD	LD
4	37825701	37826262	563	LD	LD	LD	LD
4	38134541	38135090	551	LD	LD	LD	LD
4	38182564	38182919	357	LD	LD	LD	LD
4	38762446	38764137	1693	LD	LD	LD	LD
4	39011937	39012262	327	LD	LD	LD	LD
4	39191408	39194279	2873	LD	LD	LD	LD
4	39642507	39643942	1437	LD	LD	LD	LD
4	39688801	39689015	216	LD	LD	LD	LD
4	39692367	39694557	2192	LD	LD	LD	LD
4	39861119	39864311	3194	LD	LD	LD	LD
4	40382685	40386589	3906	LD	LD	LD	LD
4	40425105	40426096	993	LD	LD	LD	LD
4	40542531	40543609	1080	LD	LD	LD	LD
4	41090798	41091373	577	LD	LD	LD	LD
4	41232752	41234346	1596	LD	LD	LD	LD
4	41477379	41477928	551	LD	LD	LD	LD
4	41998041	41998614	575	LD	LD	LD	LD
4	42071861	42072897	1038	LD	LD	LD	LD
4	42073463	42075384	1923	LD	LD	LD	LD
4	42762279	42763317	1040	LD	LDX	LD	LDX
4	45202737	45203661	926	LDX	LDX	LD	LD
4	45992129	45992526	399	LDX	LDX	LD	LD
4	49137366	49140190	2826	N/D	LDX	N/D	LDX
5	787162	787517	357	LD	LDX	LDX	LD
5	1174157	1175373	1218	LD	LD	LDX	LD
5	2848924	2849321	399	LD	LD	LDX	LDX
5	3679360	3679733	375	LD	LDX	LDX	LDX
5	4247099	4248378	1281	LD	LD	LDX	LDX
5	4369052	4369369	319	LD	LD	LDX	LDX
5	4946626	4948232	1608	LD	LD	LDX	LDX
5	5000651	5001094	445	LD	LD	LDX	LDX
5	5480330	5480731	403	LD	LD	LDX	LDX
5	6841401	6842124	725	LD	LD	LDX	LDX
5	8663865	8664404	541	Heterozygous	LDX	LDX	LDX
5	8989614	8989930	318	Heterozygous	LDX	LDX	LDX
5	11485450	11485684	236	LD	LD	N/D	LDX
5	11704924	11705749	827	LD	LD	N/D	LDX
5	14865583	14866826	1245	LD	LD	LDX	LDX
5	16192702	16193594	894	LD	LD	Heterozygous	LDX
5	16417523	16420407	2886	LD	LD	Heterozygous	LDX
5	17294639	17295091	454	Heterozygous	LD	Heterozygous	LDX
5	21814930	21815115	187	LD	LD	LDX	LDX
5	23650353	23651814	1463	N/D	LD	LDX	LDX
5	24340806	24341013	209	Heterozygous	LD	LDX	LDX
5	24380752	24381272	522	Heterozygous	LDX	LDX	LDX
5	25355048	25356342	1296	LD	LD	N/D	LDX
5	25420305	25421233	930	LD	LD	N/D	LDX
5	25535786	25536221	437	LD	LD	N/D	LDX
5	25585761	25586070	311	LD	LD	N/D	LD
5	25973061	25973516	457	LD	LD	N/D	LDX
5	26488950	26492033	3085	Heterozygous	LD	Heterozygous	LDX
5	26721872	26722623	753	Heterozygous	LD	Heterozygous	LDX
5	26788422	26789116	696	Heterozygous	LD	Heterozygous	LDX
5	27104717	27105737	1022	N/D	LD	N/D	LDX
5	28249187	28250290	1105	LD	LD	LDX	LDX
5	28322810	28323807	999	LD	LD	LDX	LDX
5	29858904	29865258	6356	LD	LD	LDX	LDX
5	30121325	30122053	730	LD	LD	LDX	LDX
5	30567344	30568929	1587	LD	LD	LDX	LDX
5	31585217	31585454	239	LD	LD	LDX	LDX
5	31596697	31597301	606	LD	LD	LDX	LDX
5	31922201	31926002	3803	LD	LD	LDX	LDX
5	38122355	38125093	2740	LD	LD	LDX	LDX
5	39268146	39268454	310	LD	LD	LDX	LDX
5	39598011	39598393	384	LD	LD	LDX	LDX
6	4708713	4709026	315	Heterozygous	LDX	Heterozygous	LD
6	11844394	11844617	225	LDX	LDX	LDX	LDX
6	12296965	12297358	395	LD	LD	N/D	LD
6	14853255	14853656	403	LD	LDX	Heterozygous	LD
6	14906655	14906983	330	LD	LDX	Heterozygous	LD
6	15036698	15037648	952	Heterozygous	LDX	LD	LD
6	15568781	15571183	2404	Heterozygous	LDX	LD	LD
6	15582296	15582912	618	Heterozygous	LDX	LD	LD
6	16923138	16923998	862	Heterozygous	LDX	LD	LD
6	17350309	17353855	3548	Heterozygous	LD	LD	LD
6	17489120	17489807	689	Heterozygous	LD	LD	LD
6	17997694	17998467	775	Heterozygous	LDX	LD	LD
6	18021699	18022852	1155	Heterozygous	LDX	LD	LD
6	18201252	18202424	1174	Heterozygous	LDX	LD	LD
6	18514679	18516007	1330	Heterozygous	LDX	LD	LD
6	18516019	18516787	770	Heterozygous	LDX	LD	LD
6	18516789	18516900	113	Heterozygous	LD	LD	LD
6	18516993	18519342	2351	Heterozygous	LDX	LD	LD
6	18519422	18519780	360	Heterozygous	LDX	LD	LD
6	18722503	18723721	1220	Heterozygous	LD	LD	LD
6	21800447	21802090	1645	Heterozygous	LD	N/D	LD
6	22471362	22472679	1319	Heterozygous	LDX	N/D	LD
6	26447895	26448512	619	Heterozygous	LDX	Heterozygous	LD
6	38717159	38717522	365	Heterozygous	LDX	Heterozygous	LD
6	39114568	39116448	1882	Heterozygous	LD	N/D	LD
6	39330887	39331314	429	Heterozygous	LD	N/D	LD
6	39819752	39819928	178	Heterozygous	LDX	N/D	LD
6	40100998	40102250	1254	Heterozygous	LDX	N/D	LD
6	41077460	41078535	1077	Heterozygous	LD	N/D	LD
6	41333849	41334425	578	Heterozygous	LD	N/D	LD
6	42474220	42476276	2058	Heterozygous	LD	N/D	LD
6	43579573	43579790	219	Heterozygous	No association detected	N/D	LD
6	43579808	43580123	317	Heterozygous	LD	N/D	LD
6	43915890	43916617	729	Heterozygous	LDX	N/D	LD
6	44689963	44691009	1048	Heterozygous	LD	LDX	LDX
6	44691070	44693039	1971	Heterozygous	LDX	LDX	LDX
6	45168644	45169763	1121	Heterozygous	LDX	LDX	LDX
6	45172566	45173239	675	Heterozygous	LD	LDX	LDX
6	45504907	45505678	773	Heterozygous	LDX	LDX	LDX
6	46310495	46310944	451	LDX	LDX	LDX	LDX
6	46310950	46311170	222	LDX	No association detected	LDX	LDX
6	46633040	46634065	1027	LDX	LDX	LDX	LDX
6	46952508	46953641	1135	LDX	LD	LDX	LDX
6	46961580	46962459	881	LDX	LDX	LDX	LDX
6	48981249	48981684	437	LD	LD	LDX	LD
6	49579924	49580109	187	Heterozygous	LDX	LDX	LDX
6	49655465	49655680	217	Heterozygous	LD	LDX	LDX
7	4233118	4233405	289	LDX	No association detected	LDX	LD
7	14435097	14435259	164	Heterozygous	LD	Heterozygous	LDX
7	16260892	16261838	948	Heterozygous	LD	Heterozygous	LDX
7	16319678	16320219	543	Heterozygous	LDX	Heterozygous	LD
7	18485339	18485479	142	LDX	LDX	Heterozygous	LDX
7	18864100	18865669	1571	LDX	LDX	Heterozygous	LD
7	20861220	20863200	1982	N/D	LD	N/D	LD
7	21007954	21009476	1524	LDX	LDX	Heterozygous	LD
7	21230865	21231881	1018	LDX	LDX	Heterozygous	LD
7	21231882	21232627	747	LDX	LDX	Heterozygous	LD
7	24924630	24925431	803	Heterozygous	LD	Heterozygous	LD
7	25545644	25545968	326	Heterozygous	LD	N/D	LD
7	27030253	27032501	2250	Heterozygous	LDX	N/D	LD
7	27453870	27454482	614	Heterozygous	LDX	N/D	LD
7	28375034	28375738	706	Heterozygous	LDX	N/D	LD
7	32043820	32044370	552	Heterozygous	LD	N/D	LD
7	32970626	32973119	2495	Heterozygous	LD	N/D	LD
7	35051494	35052573	1081	Heterozygous	LD	LD	LD
7	36171874	36173303	1431	LDX	LDX	LD	LD
7	36197573	36198007	436	LDX	LDX	LD	LD
7	36247627	36248805	1180	LDX	LDX	LD	LD
7	36691010	36692023	1015	LDX	LDX	LD	LD
7	37402736	37403337	603	LDX	LDX	LD	LD
7	37839357	37839818	463	LDX	LDX	LD	LD
7	37980748	37982769	2023	LDX	LDX	LD	LD
7	38297827	38300053	2228	LDX	LDX	Heterozygous	LD
7	38697055	38698078	1025	LDX	LDX	Heterozygous	LDX
7	39498716	39499802	1088	LDX	LDX	LDX	LDX
7	39853093	39853576	485	LDX	LDX	LDX	LDX
7	40065549	40067454	1907	LDX	LDX	LDX	LDX
7	40672078	40672622	546	LDX	LDX	LDX	LDX
8	49254	50492	1240	LD	LD	LDX	LDX
8	7565133	7565378	247	LDX	LDX	LDX	LDX
8	10558435	10558578	145	LDX	LDX	LDX	LDX
8	11506600	11506942	344	LDX	LDX	LDX	LDX
8	12810922	12812980	2060	LDX	LDX	LDX	LDX
8	13061263	13062013	752	LDX	LDX	LDX	LDX
8	13496886	13497287	403	LDX	LDX	LDX	LDX
8	13745303	13746110	809	LDX	LDX	LDX	LDX
8	13922802	13923077	277	LDX	LDX	LDX	LD
8	13923894	13924193	301	LDX	LDX	LDX	LDX
8	15227873	15230255	2384	LDX	LDX	LDX	LDX
8	15849473	15849969	498	LDX	LDX	LDX	LDX
8	16483340	16483621	283	Heterozygous	LDX	LDX	LDX
8	16963964	16964877	915	Heterozygous	LD	LDX	LDX
8	17432443	17433132	691	Heterozygous	LDX	LDX	LDX
8	18260454	18260858	406	LDX	LD	LDX	LD
8	22298448	22299148	702	LD	LD	LD	LD
8	23347528	23348484	958	LD	LD	LD	LD
8	23636598	23638607	2011	LD	LD	LD	LD
8	23880211	23881587	1378	LD	LD	LD	LD
8	25153177	25154067	892	LD	LD	LD	LD
8	28987380	28991118	3740	LD	LD	LD	LD
8	29656505	29658594	2091	LD	LD	LD	LD
8	29662957	29663967	1012	LD	LD	LD	LD
8	29768845	29769749	906	LD	LD	LD	LD
8	29769787	29770799	1014	LD	LD	LD	LD
8	30080583	30080979	398	LD	LD	LD	LD
8	30170841	30172119	1280	LD	LD	LD	LD
8	30283849	30286110	2263	LD	LD	LD	LD
8	31789557	31790479	924	LD	LD	LD	LD
8	32982722	32983606	886	LD	LD	LD	LD
8	33748487	33752567	4082	LD	LD	LD	LD
8	34325611	34325910	301	LD	LD	LD	LD
8	34329555	34331312	1759	LD	LD	LD	LD
8	35144416	35145760	1346	LD	LD	LD	LD
8	35277620	35279176	1558	LD	LD	LD	LD
8	35430728	35432660	1934	LD	LD	LD	LD
8	35433240	35433718	480	LD	LD	LD	LD
8	35437722	35438898	1178	LD	LD	LD	LD
8	35439607	35443019	3414	LD	LD	LD	LD
8	35543340	35546156	2818	LD	LD	LD	LD
8	35811033	35812655	1624	LD	LD	LD	LD
8	35825468	35826876	1410	LD	LD	LD	LD
8	35829667	35830627	962	LD	LD	LD	LD
8	36226267	36228388	2123	LD	LD	LD	LD
8	36276417	36278289	1874	LD	LD	LD	LD
8	39091737	39092671	936	Heterozygous	LD	Heterozygous	LD
8	40240457	40243801	3346	Heterozygous	LD	Heterozygous	LD
8	41147838	41148923	1087	LDX	LD	LDX	LD
8	41149066	41150214	1150	LDX	LD	LDX	LD
8	42407742	42408678	938	LD	LD	Heterozygous	LDX
8	42701572	42702957	1387	LD	LD	Heterozygous	LD
8	42888447	42889517	1072	LD	LD	Heterozygous	LD
8	43418141	43419064	925	LD	LD	Heterozygous	LD
8	46943665	46944976	1313	Heterozygous	LDX	Heterozygous	LDX
9	929722	930442	722	LD	LD	LDX	LDX
9	3357958	3358405	449	LDX	LDX	LD	LD
9	3525840	3526251	413	LDX	LDX	LD	LD
9	3793326	3795837	2513	LDX	LDX	LD	LD
9	4980461	4981056	597	N/D	LDX	LD	LD
9	5772204	5773396	1194	Heterozygous	LD	LD	LD
9	6035468	6040118	4652	Heterozygous	LDX	LD	LD
9	6040231	6042428	2199	Heterozygous	LDX	LD	LD
9	6043118	6044406	1290	Heterozygous	LDX	LD	LD
9	18573770	18573982	214	Heterozygous	LD	Heterozygous	LD
9	18573988	18575263	1277	Heterozygous	LD	Heterozygous	LD
9	27499660	27499833	175	Heterozygous	No association detected	Heterozygous	LD
9	30155363	30155585	224	Heterozygous	LDX	Heterozygous	LD
9	31753321	31753600	281	Heterozygous	LD	Heterozygous	LDX
9	31753821	31754160	341	Heterozygous	LDX	Heterozygous	LDX
9	32030760	32031019	261	Heterozygous	LD	Heterozygous	LD
9	32084498	32085766	1270	Heterozygous	LDX	Heterozygous	LD
9	34126962	34127278	318	LDX	LDX	LDX	LD
9	36513131	36514162	1033	LDX	LD	LDX	LD
9	37276469	37276930	463	LDX	LD	LDX	LDX
9	39042807	39043296	491	Heterozygous	LD	Heterozygous	LDX
9	39633352	39634292	942	Heterozygous	LD	Heterozygous	LDX
9	40030601	40031159	560	LDX	LDX	Heterozygous	LDX
9	40353306	40353503	199	LDX	LD	Heterozygous	LD
9	43658964	43659994	1032	LDX	LDX	LDX	LDX
9	44111103	44112296	1195	LDX	LDX	LDX	LDX
10	1584430	1584962	534	LD	LD	LDX	LDX
10	1759932	1760546	616	LD	LDX	LDX	LDX
10	4665540	4665992	454	LD	LD	N/D	LDX
10	6631653	6635912	4261	LD	LD	LD	LD
10	6854389	6855212	825	LD	LD	LD	LD
10	6855601	6858445	2846	LD	LD	LD	LD
10	7050447	7052123	1678	LD	LD	LD	LD
10	7399031	7402483	3454	LD	LD	LD	LD
10	7404033	7405793	1762	LD	LD	LD	LD
10	8585590	8586419	831	LD	LD	LD	LD
10	9018706	9019262	558	LD	LD	LD	LD
10	9194291	9196056	1767	LD	LD	LD	LD
10	9551752	9552558	808	LD	LD	LD	LD
10	9639121	9639938	819	LD	LD	LD	LDX
10	9648355	9649125	772	LD	LD	LD	LD
10	9657602	9659437	1837	LD	LD	LD	LD
10	9932713	9933900	1189	LD	LD	LD	LD
10	10193643	10195921	2280	LD	LD	LD	LD
10	10224637	10225590	955	LD	LD	LD	LD
10	10308213	10308713	502	LD	LD	LD	LD
10	10870903	10871482	581	LD	LD	LD	LD
10	11329744	11330365	623	LD	LD	LD	LD
10	11671689	11672427	740	LD	LD	LD	LD
10	11725760	11727907	2149	LD	LD	LD	LD
10	12472988	12475641	2655	LD	LD	LD	LD
10	12497441	12498852	1413	LD	LD	LD	LD
10	13122162	13123135	975	LD	LD	LD	LD
10	15180343	15181822	1481	LD	LD	LD	LD
10	15501493	15502359	868	LD	LD	LD	LD
10	15794081	15795148	1069	LD	LD	LD	LD
10	16484270	16485287	1019	Heterozygous	LD	Heterozygous	LD
10	16995797	16998368	2573	Heterozygous	LD	Heterozygous	LD
10	18262205	18263358	1155	LD	LD	LD	LD
10	18616654	18617811	1159	LD	LD	LD	LD
10	19502359	19504516	2159	LD	LD	LD	LD
10	19844322	19844594	274	LD	LD	LD	LD
10	21062636	21062975	341	LD	LD	LD	LD
10	21416956	21417832	878	LD	LD	LD	LD
10	21481016	21482590	1576	LD	LD	LD	LD
10	25247217	25247938	723	LD	LD	LD	LD
10	26938308	26940683	2377	Heterozygous	LD	LD	LD
10	27932259	27933186	929	N/D	LD	LD	LD
10	28873505	28873900	397	LD	LD	LD	LD
10	28918761	28919316	557	LD	LD	LD	LD
10	29269624	29270497	875	N/D	LD	N/D	LD
10	29370160	29371046	888	N/D	LD	N/D	LD
10	29722052	29723472	1422	N/D	LD	N/D	LD
10	30469664	30470685	1023	N/D	LD	N/D	LD
10	30540485	30541259	776	N/D	LD	N/D	LD
10	31211143	31212044	903	N/D	LD	N/D	LD
10	32332815	32334066	1253	N/D	LD	Heterozygous	LD
10	33485430	33487693	2265	N/D	LD	Heterozygous	LD
10	34055182	34055967	787	Heterozygous	LD	Heterozygous	LD
10	34315932	34316473	543	Heterozygous	LD	Heterozygous	LD
10	34914706	34918290	3586	Heterozygous	LD	Heterozygous	LD
10	35656769	35659064	2297	LD	LD	LD	LD
10	35744133	35746202	2071	LD	LD	LD	LD
10	35746756	35749306	2552	LD	LD	LD	LD
10	36195608	36198513	2907	LD	LD	LD	LD
10	36198577	36200494	1919	LD	LD	LD	LD
10	36887626	36888081	457	LD	LD	LD	LD
10	36893358	36895763	2407	LD	LD	LD	LD
10	36927754	36929020	1268	LD	LD	LD	LD
10	37026374	37027271	899	LD	LD	LD	LD
10	37290509	37291040	533	LD	LD	LD	LD
10	37486491	37487321	832	LD	LD	LD	LD
10	38678426	38679677	1253	LD	LD	LD	LD
10	42015045	42015282	239	LD	LD	LD	LD
10	42164034	42164469	437	LD	LD	LD	LDX
10	45909592	45910683	1093	LDX	LDX	LD	LD
10	46166899	46167445	548	LDX	LDX	LD	LD
10	50575831	50576184	355	LDX	LDX	Heterozygous	LD
11	737316	737738	424	LDX	LDX	LD	LD
11	3129195	3129488	295	Heterozygous	LD	Heterozygous	LD
11	5015728	5016401	675	LD	LD	LD	LDX
11	5016634	5017590	958	LD	LD	LD	LDX
11	10927137	10929205	2070	LD	LD	LDX	LDX
11	11117202	11118211	1011	LD	LD	LDX	LDX
11	11790642	11791939	1299	LD	LD	LDX	LDX
11	11895817	11896462	647	LD	LD	LDX	LDX
11	15204172	15205651	1481	LD	LD	LDX	LDX
11	15251273	15251715	444	LD	LD	LDX	LDX
11	15880431	15881374	945	LD	LD	LDX	LDX
11	16314338	16315732	1396	LDX	LDX	LDX	LDX
11	16342419	16343800	1383	LDX	LDX	LDX	LDX
11	16439724	16440015	293	LDX	LDX	LDX	LDX
11	16490678	16492258	1582	LDX	LDX	LDX	LDX
11	16569953	16570599	648	LDX	LDX	LDX	LDX
11	16839151	16839733	584	LDX	LDX	LDX	LDX
11	17994823	17995259	438	LDX	LDX	LDX	LDX
11	18118638	18119747	1111	LDX	LDX	LDX	LDX
11	18147672	18150874	3204	LDX	LDX	LDX	LDX
11	18194740	18196317	1579	LDX	LDX	LDX	LDX
11	18354732	18355749	1019	LDX	LDX	LDX	LDX
11	18494101	18494430	331	LDX	LDX	LDX	LD
11	18494967	18495438	473	LDX	LDX	LDX	LDX
11	18892129	18893123	996	LDX	LDX	LDX	LDX
11	24331538	24332038	502	LDX	LDX	LDX	LDX
11	24340385	24342968	2585	LDX	LDX	LDX	LDX
11	24970451	24973086	2637	LDX	LDX	LDX	LDX
11	27742494	27743054	562	LDX	LDX	LDX	LDX
11	28841032	28843155	2125	LDX	LDX	LDX	LDX
11	30073479	30074458	981	LDX	LDX	LDX	LDX
11	30246441	30249143	2704	LDX	LDX	LDX	LDX
11	31131722	31131999	279	Heterozygous	LDX	LDX	LDX
11	31132120	31132737	619	Heterozygous	LDX	LDX	LDX
11	31680923	31681115	194	Heterozygous	LDX	LDX	LDX
11	32780944	32781723	781	LDX	LDX	LDX	LDX
11	33150442	33152748	2308	LDX	LDX	Heterozygous	LDX
11	33544279	33544842	565	LDX	LDX	Heterozygous	LDX
11	33643013	33644942	1931	LDX	LDX	Heterozygous	LDX
11	34176917	34177619	704	LDX	LDX	LDX	LDX
11	34273775	34275066	1293	LDX	LDX	LDX	LDX
11	34275863	34277807	1946	LDX	LDX	LDX	LDX
11	34597138	34597310	174	LDX	LDX	LDX	LDX
11	34678050	34679827	1779	LDX	LDX	LDX	LDX
11	36152231	36152344	115	LDX	LD	LDX	LDX
11	37349982	37350952	972	Heterozygous	LD	LDX	LDX
11	37402980	37403372	394	Heterozygous	LDX	LDX	LD
11	37407216	37407792	578	Heterozygous	LDX	LDX	LD
11	37431459	37431619	162	Heterozygous	LDX	LDX	LDX
11	37497965	37498356	393	Heterozygous	LDX	LDX	LDX
11	37896992	37898025	1035	Heterozygous	LD	LDX	LDX
11	37916406	37919001	2597	Heterozygous	LD	LDX	LDX
11	38791423	38792243	822	LD	LD	LDX	LDX
12	5408845	5409695	852	N/D	LD	LD	LD
12	5962962	5963409	449	N/D	LDX	LD	LDX
12	6445592	6446192	602	Heterozygous	LDX	LD	LD
12	6875333	6875586	255	Heterozygous	LD	LD	LD
12	7267194	7267374	182	LDX	LDX	LD	LD
12	7377826	7378302	478	LDX	LDX	LD	LD
12	7379073	7380545	1474	LDX	LDX	LD	LD
12	7447858	7449772	1916	LDX	LD	LD	LD
12	7684272	7686313	2043	LDX	LD	LD	LD
12	7810235	7810772	539	LDX	LD	LD	LD
12	7876285	7876750	467	LDX	LDX	LD	LD
12	8501816	8502330	516	LDX	LDX	LD	LD
12	9860839	9862414	1577	Heterozygous	LDX	LD	LD
12	10170475	10171564	1091	LD	LDX	LD	LD
12	10171579	10172012	435	LD	LDX	LD	LD
12	10512860	10513662	804	LD	LD	LD	LD
12	10623800	10625003	1205	LD	LDX	LD	LD
12	10666946	10668737	1793	LD	LDX	LD	LD
12	10668830	10670538	1710	LD	LDX	LD	LD
12	10670728	10671460	734	LD	LDX	LD	LD
12	10693992	10694315	325	LD	LD	LD	LD
12	10723304	10724438	1136	LD	LDX	LD	LD
12	10727537	10728532	997	LD	LDX	LD	LD
12	10741139	10742144	1007	LD	LDX	LD	LD
12	10952207	10953075	870	LD	LDX	LD	LD
12	11044897	11045826	931	Heterozygous	LDX	LD	LD
12	11513561	11514405	846	Heterozygous	LD	LD	LD
12	11514592	11517810	3220	Heterozygous	LD	LD	LD
12	12248790	12250347	1559	Heterozygous	LD	LD	LD
12	12265088	12265420	334	Heterozygous	LDX	LD	LD
12	12315389	12318960	3573	Heterozygous	LD	LD	LD
12	12319035	12319894	861	Heterozygous	LD	LD	LD
12	12379667	12381237	1572	Heterozygous	LDX	LD	LD
12	12656741	12657368	629	Heterozygous	LDX	LD	LD
12	12883336	12885182	1848	Heterozygous	LDX	LD	LD
12	13311671	13312494	825	Heterozygous	LD	LD	LD
12	13435686	13436511	827	Heterozygous	LD	LD	LD
12	13886066	13886961	897	Heterozygous	LD	LD	LD
12	14023993	14024588	597	LD	LD	LD	LD
12	14901034	14901676	644	LD	LDX	LD	LD
12	15407390	15408152	764	LD	LDX	LD	LD
12	16403878	16404792	916	LD	LD	LD	LD
12	18437377	18438238	863	LD	LDX	LD	LD
12	18821377	18822150	775	LD	LD	LD	LD
12	19420710	19422864	2156	N/D	LD	LD	LD
12	25561295	25561972	679	Heterozygous	LDX	LD	LD
12	25854309	25855444	1137	Heterozygous	LDX	LD	LDX
12	25870613	25872927	2316	Heterozygous	LDX	LD	LD
12	27108499	27109827	1330	Heterozygous	LDX	N/D	LD
12	27111596	27113097	1503	Heterozygous	LDX	N/D	LD
12	27186373	27187397	1026	Heterozygous	LD	N/D	LD
12	27187408	27189437	2031	Heterozygous	LDX	N/D	LD
12	27202912	27203450	540	Heterozygous	LDX	N/D	LD
12	27203751	27204461	712	Heterozygous	LDX	N/D	LD
12	27232206	27232935	731	Heterozygous	LDX	N/D	LD
12	27232937	27233648	713	Heterozygous	LDX	N/D	LD
12	27233660	27234845	1187	Heterozygous	LDX	N/D	LD
12	27582163	27584001	1840	Heterozygous	LDX	N/D	LD
12	27735212	27735626	416	Heterozygous	LD	N/D	LD
12	28403944	28404737	795	Heterozygous	LDX	LD	LDX
12	28861919	28862080	163	Heterozygous	LDX	LD	LD
12	28862095	28862472	379	Heterozygous	LDX	LD	LD
12	30385870	30388143	2275	Heterozygous	LD	LD	LD
12	30403389	30403743	356	Heterozygous	LD	LD	LD
12	30404652	30405366	716	Heterozygous	LDX	LD	LD
12	30517164	30518133	971	Heterozygous	LD	LD	LD
12	31469464	31469781	319	Heterozygous	LD	LD	LD
12	32048594	32049266	674	LDX	LDX	Heterozygous	LD
12	32431213	32431869	658	LDX	LDX	Heterozygous	LD
12	32606629	32608164	1537	LDX	LDX	Heterozygous	LD
12	32755885	32757001	1118	LDX	LDX	Heterozygous	LD
12	34663576	34664171	597	LDX	LDX	LD	LD
12	37275247	37275575	330	Heterozygous	LDX	LDX	LDX
12	37275689	37276351	664	Heterozygous	LD	LDX	LDX
12	37288906	37289868	964	Heterozygous	LD	LDX	LDX
12	37291547	37292225	680	Heterozygous	LD	LDX	LDX
12	37337382	37338092	712	Heterozygous	LD	LDX	LDX
12	37338163	37338244	83	Heterozygous	N/D	LDX	N/D
12	40096146	40096442	298	N/D	LD	N/D	LD
13	3137643	3138051	410	LD	LD	LD	LD
13	3138648	3139783	1137	LD	LD	LD	LD
13	3540404	3541447	1045	LD	LD	LD	LD
13	4595653	4595992	341	Heterozygous	LD	Heterozygous	LD
13	4760570	4760660	92	Heterozygous	No association detected	Heterozygous	LD
13	4760749	4761615	868	Heterozygous	No association detected	Heterozygous	No association detected
13	4990791	4991602	813	Heterozygous	LD	Heterozygous	LD
13	5542169	5543843	1676	LDX	LDX	LDX	LDX
13	6608846	6609561	717	Heterozygous	LDX	LDX	LDX
13	6717132	6717461	331	Heterozygous	LDX	LDX	LDX
13	8408640	8408898	260	LDX	LDX	LDX	LDX
13	8408904	8409464	562	LDX	LD	LDX	LDX
13	8409478	8409583	107	LDX	LD	LDX	LDX
13	9084059	9084569	512	LDX	LDX	LDX	LDX
13	13817941	13818143	204	LDX	LDX	LDX	LDX
13	24239079	24239643	566	LD	LD	Heterozygous	LDX
13	24418167	24419244	1079	LD	LD	Heterozygous	LDX
13	24419422	24420032	612	LD	LD	Heterozygous	LDX
13	25761806	25762815	1011	LD	LD	Heterozygous	LD
13	25762816	25763578	764	LD	LD	Heterozygous	LD
13	26233704	26235198	1496	LD	LD	Heterozygous	LD
13	28495939	28497035	1098	LD	LD	Heterozygous	LDX
13	32815386	32816320	936	N/D	No association detected	N/D	No association detected
13	36551760	36552017	259	LDX	LDX	Heterozygous	LD
13	40819205	40822066	2863	Heterozygous	LD	Heterozygous	LD
13	42763628	42763864	238	LD	LD	LDX	LDX
13	42789109	42789670	563	LD	LD	LDX	LDX
13	43011918	43012001	85	LD	LDX	LDX	LDX
13	43988592	43989467	877	LD	LD	LDX	LDX
13	44304219	44304949	732	LD	LD	LDX	LD
14	7896	10452	2558	Heterozygous	LD	LD	LD
14	938720	939130	412	Heterozygous	LDX	LD	LDX
14	1395977	1397001	1026	Heterozygous	LDX	LD	LD
14	1441487	1443094	1609	Heterozygous	LDX	LD	LD
14	3732564	3733459	897	Heterozygous	LD	LDX	LD
14	3750461	3750995	536	Heterozygous	LDX	LDX	LDX
14	5150340	5150519	181	LDX	LDX	LDX	LDX
14	5781740	5782678	940	LDX	LDX	LDX	LDX
14	6720954	6722582	1630	LDX	LDX	LDX	LDX
14	10031706	10033875	2171	LD	LD	LDX	LDX
14	10277189	10281795	4608	LD	LD	LDX	LD
14	10281992	10282302	312	LD	LD	LDX	LD
14	10356586	10357197	613	LD	LD	LDX	LDX
14	10357716	10359623	1909	LD	LD	LDX	LDX
14	10571044	10571586	544	LD	LDX	LDX	LDX
14	10840663	10841795	1134	LD	LD	LDX	LDX
14	10900507	10902079	1574	LD	LD	LDX	LDX
14	10954816	10957027	2213	LD	LD	LDX	LDX
14	10997408	10998187	781	LD	LD	LDX	LDX
14	10998689	10999167	480	LD	LD	LDX	LDX
14	11320813	11322281	1470	LD	LD	LDX	LDX
14	11681430	11682392	964	LD	LD	LDX	LDX
14	11682808	11685032	2226	LD	LD	LDX	LDX
14	11776828	11779812	2986	LD	LD	LDX	LDX
14	12253252	12254037	787	LD	LD	LDX	LDX
14	12427427	12428362	937	LD	LD	LDX	LDX
14	12481174	12483778	2606	LD	LD	LDX	LDX
14	12722676	12723625	951	LD	LD	LDX	LDX
14	13437101	13438077	978	LD	LD	LDX	LDX
14	13576561	13577290	731	LD	LD	LDX	LDX
14	13696977	13697684	709	LD	LD	LDX	LDX
14	13716702	13719055	2355	LD	LD	LDX	LDX
14	13895814	13897482	1670	LD	LD	LDX	LDX
14	14906571	14906892	323	LD	LD	Heterozygous	LDX
14	15813159	15814747	1590	LD	LD	N/D	LDX
14	15815401	15817078	1679	LD	LD	N/D	LDX
14	15919077	15919888	813	LD	LD	N/D	LDX
14	15969618	15971261	1645	LD	LD	N/D	LDX
14	17206870	17207788	920	LD	LD	N/D	LDX
14	18017779	18018092	315	LD	LD	N/D	LDX
14	18416304	18419324	3022	LD	LD	N/D	LDX
14	18419422	18421609	2189	LD	LD	N/D	LDX
14	18810187	18813476	3291	LD	LD	N/D	LDX
14	19249767	19249948	183	LD	LD	LDX	LDX
14	19483166	19484234	1070	LD	LD	LDX	LDX
14	19549506	19549949	445	LD	LD	LDX	LDX
14	23322312	23322900	590	LD	LD	Heterozygous	LDX
14	24571930	24572454	526	LD	LD	N/D	LDX
14	24573755	24575503	1750	LD	LD	N/D	LDX
14	26283745	26284283	540	LD	LD	LDX	LDX
14	26290478	26291214	738	LD	LD	LDX	LDX
14	28107764	28111016	3254	N/D	LD	LDX	LDX
14	28821661	28822512	853	N/D	LD	LDX	LDX
14	35799502	35800183	683	Heterozygous	LD	Heterozygous	LDX
14	42846727	42847695	970	Heterozygous	LD	LDX	LDX
14	43139146	43140850	1706	N/D	LD	LDX	LDX
14	43141703	43142731	1030	N/D	LD	LDX	LDX
14	43368410	43368965	557	N/D	LD	LDX	LDX
14	44157776	44160394	2620	N/D	LD	LDX	LDX
14	44986658	44988245	1589	N/D	LD	LDX	LDX
14	46256063	46256261	200	LD	LD	LDX	LDX
14	46333128	46334038	912	LD	LD	LDX	LDX
14	46563931	46564435	506	LD	LD	LDX	LDX
14	46569154	46570095	943	LD	LD	LDX	LDX
14	47020180	47021502	1324	LD	LD	LDX	LDX
14	48344422	48345635	1215	Heterozygous	LD	LDX	N/D
14	48550669	48551265	598	Heterozygous	LD	LDX	LDX
15	661	998	339	N/D	No association detected	N/D	No association detected
15	6537	7341	806	N/D	No association detected	N/D	No association detected
15	69550	72090	2542	N/D	LD	N/D	LDX
15	1462414	1463806	1394	Heterozygous	LD	LDX	LDX
15	1965701	1966332	633	Heterozygous	LD	LDX	LDX
15	6935926	6936503	579	Heterozygous	LD	LD	LD
15	9780859	9781097	240	LDX	N/D	LD	LD
15	12049865	12050823	960	Heterozygous	LDX	LD	LD
15	12116545	12118878	2335	Heterozygous	LDX	LD	LD
15	12208535	12208915	382	Heterozygous	LDX	LD	LD
15	12529914	12531337	1425	Heterozygous	LDX	LD	LD
15	12642802	12643196	396	Heterozygous	LD	LD	LD
15	12694699	12695446	749	Heterozygous	LD	LD	LD
15	12696461	12697292	833	Heterozygous	LDX	LD	LD
15	12847882	12848683	803	Heterozygous	LD	LD	LD
15	13310352	13311001	651	Heterozygous	LDX	LD	LD
15	14424091	14424294	205	Heterozygous	N/D	LD	LD
15	14927524	14928642	1120	Heterozygous	LDX	LD	N/D
15	14936201	14936337	138	Heterozygous	N/D	LD	N/D
15	15692633	15693140	509	Heterozygous	LDX	LD	LD
15	16078839	16079808	971	Heterozygous	LDX	LD	LD
15	16081831	16082256	427	Heterozygous	LDX	LD	LD
15	16623667	16624395	730	Heterozygous	LDX	LD	LD
15	16767326	16768237	913	Heterozygous	LDX	LD	LD
15	16825632	16826219	589	Heterozygous	LDX	LD	LDX
15	17087286	17088082	798	Heterozygous	LDX	LD	LD
15	17116356	17119098	2744	Heterozygous	LDX	LD	LD
15	17160354	17162329	1977	Heterozygous	LDX	LD	LD
15	17293982	17295936	1956	Heterozygous	LDX	LD	LD
15	17522566	17523678	1114	Heterozygous	LDX	LD	LD
15	17586154	17587649	1497	Heterozygous	LD	LD	LD
15	17806615	17808126	1513	Heterozygous	LD	LD	LD
15	17868224	17869986	1764	Heterozygous	LDX	LD	LD
15	17961373	17961972	601	Heterozygous	LDX	LD	LD
15	18270796	18272323	1529	Heterozygous	LDX	LD	LD
15	18283668	18284278	612	Heterozygous	LDX	LD	LD
15	18353467	18354783	1318	Heterozygous	LDX	LD	LD
15	18373049	18373748	701	Heterozygous	No association detected	LD	LD
15	18453706	18453949	245	Heterozygous	LD	LD	LD
15	18491438	18492695	1259	Heterozygous	LDX	LD	LDX
15	18530464	18531592	1130	Heterozygous	LDX	LD	LD
15	18554376	18556349	1975	Heterozygous	LD	LD	LD
15	18565585	18566287	704	Heterozygous	LDX	LD	LD
15	18665679	18667272	1595	Heterozygous	LDX	LD	LD
15	18784665	18785990	1327	Heterozygous	LDX	LD	LD
15	19320864	19323530	2668	Heterozygous	LDX	LD	LD
15	19468828	19469848	1022	Heterozygous	LDX	LD	LD
15	19618725	19619414	691	Heterozygous	LDX	LD	LD
15	19619513	19619779	268	Heterozygous	LDX	LD	LD
15	19620008	19620343	337	Heterozygous	LDX	LD	LD
15	19620363	19621259	898	Heterozygous	LDX	LD	LD
15	19621268	19622907	1641	Heterozygous	LDX	LD	LD
15	19624391	19624707	318	Heterozygous	LDX	LD	LD
15	19688754	19689793	1041	Heterozygous	LDX	LD	LD
15	19702683	19703585	904	Heterozygous	No association detected	LD	LD
15	19706125	19706450	327	Heterozygous	LDX	LD	LD
15	20045894	20049247	3355	Heterozygous	LDX	LD	LD
15	20416214	20417648	1436	Heterozygous	LDX	LD	LD
15	20438238	20439220	984	Heterozygous	LDX	LD	LD
15	20682273	20683204	933	Heterozygous	LDX	LD	LD
15	20944508	20945498	992	Heterozygous	LD	LD	LD
15	21779155	21779800	647	Heterozygous	LDX	LD	LD
15	21939292	21940528	1238	Heterozygous	LDX	LD	LD
15	22228074	22228850	778	Heterozygous	LDX	LD	LD
15	22264161	22266563	2404	Heterozygous	LDX	LD	LD
15	22444121	22445206	1087	Heterozygous	LDX	LD	LD
15	22449722	22451530	1810	Heterozygous	LDX	LD	LD
15	22599099	22600801	1704	Heterozygous	LDX	LD	LD
15	22606911	22607904	995	Heterozygous	LD	LD	LD
15	22608726	22609111	387	Heterozygous	LDX	LD	LD
15	23226466	23227537	1073	Heterozygous	LDX	LD	LD
15	23284885	23286345	1462	Heterozygous	LDX	LD	LD
15	23389463	23391313	1852	Heterozygous	LDX	LD	LD
15	23564987	23566354	1369	Heterozygous	LDX	LD	LD
15	23566925	23568197	1274	Heterozygous	LDX	LD	LD
15	23725553	23726306	755	Heterozygous	LDX	LD	LD
15	24380472	24380784	314	Heterozygous	LDX	LD	LD
15	24443288	24445867	2581	Heterozygous	LDX	LD	LD
15	26244758	26247389	2633	Heterozygous	LDX	LD	LD
15	27589452	27591628	2178	Heterozygous	LDX	LD	LD
15	27592745	27593093	350	Heterozygous	LDX	LD	LD
15	29650068	29650402	336	Heterozygous	LDX	LD	LD
15	30211644	30213221	1579	Heterozygous	LDX	LD	LD
15	30442368	30443699	1333	Heterozygous	LDX	LD	LD
15	30742632	30744301	1671	Heterozygous	LDX	LD	LD
15	31013815	31016084	2271	Heterozygous	LD	LD	LD
15	32283279	32283955	678	Heterozygous	LDX	LD	LD
15	32331042	32331991	951	Heterozygous	LDX	LD	LD
15	32332140	32332805	667	Heterozygous	LDX	LD	LD
15	32725838	32727579	1743	Heterozygous	LDX	LD	LD
15	32771381	32772498	1119	Heterozygous	LD	LD	LD
15	33338544	33341179	2637	LDX	LDX	LD	LD
15	33929149	33930783	1636	LDX	LDX	LD	LD
15	34988347	34989673	1328	LDX	LDX	LD	LD
15	35873602	35875232	1632	Heterozygous	LDX	LD	LD
15	36450669	36450889	222	LDX	LDX	LD	LD
15	36683793	36687587	3796	LDX	LDX	LD	LD
15	38896695	38898196	1503	Heterozygous	LDX	LD	LD
15	38968156	38969857	1703	Heterozygous	LDX	LD	LD
15	39365597	39367486	1891	Heterozygous	LDX	LD	LD
15	39685683	39688159	2478	Heterozygous	LDX	LD	LD
15	39767578	39768039	463	Heterozygous	LDX	LD	LD
15	39892428	39892989	563	Heterozygous	LD	LD	LD
15	40460308	40462168	1862	LDX	LDX	LD	LD
15	40778475	40778789	316	LDX	LDX	LD	LD
15	40868587	40869331	746	LDX	LD	LD	LD
15	40948299	40949213	916	LDX	LDX	LD	LD
15	41235059	41236255	1198	Heterozygous	LDX	LD	LD
15	41422372	41423902	1532	Heterozygous	LDX	LD	LD
15	41832378	41834268	1892	Heterozygous	LDX	LD	LD
15	42218945	42221381	2438	Heterozygous	LDX	LD	LD
15	42222160	42222768	610	Heterozygous	LDX	LD	LD
15	42261908	42262541	635	Heterozygous	LDX	LD	LD
15	42365984	42367485	1503	Heterozygous	LD	LD	LD
15	42615842	42617315	1475	Heterozygous	LDX	LD	LD
15	42628400	42629526	1128	Heterozygous	LDX	LD	LD
15	42971149	42972917	1770	Heterozygous	LDX	LD	LD
15	44280818	44281801	985	N/D	LDX	N/D	LD
15	44783356	44784670	1316	N/D	LDX	N/D	LD
15	44794421	44795357	938	N/D	LDX	N/D	LD
15	44818721	44818925	206	N/D	LD	N/D	LD
15	44818939	44819008	71	N/D	LDX	N/D	LD
15	47267249	47267783	536	LDX	LDX	Heterozygous	No association detected
15	49313547	49313935	390	LDX	LDX	LDX	LDX
15	50539347	50540434	1089	LD	LD	LD	LD
15	50632376	50632945	571	LD	LD	LD	LD
15	50872243	50872742	501	LD	LD	LD	LD
16	2669958	2670525	569	N/D	LDX	N/D	LD
16	3827996	3828502	508	LDX	LDX	Heterozygous	LDX
16	3864479	3865896	1419	LDX	LD	Heterozygous	LD
16	5927802	5930443	2643	LDX	LD	LD	LD
16	5977241	5978024	785	LDX	LD	LD	LD
16	6656066	6656510	446	Heterozygous	LDX	LD	LD
16	6659863	6660085	224	Heterozygous	LD	LD	LD
16	7404571	7405508	939	Heterozygous	LD	LD	LD
16	7406018	7406653	637	Heterozygous	LD	LD	LD
16	7406723	7408876	2155	Heterozygous	LD	LD	LD
16	7563822	7564556	736	Heterozygous	LDX	LD	LD
16	7564558	7565382	826	Heterozygous	LDX	LD	LD
16	7693205	7693721	518	Heterozygous	LD	LD	LD
16	10910131	10910329	200	LDX	LD	LDX	LD
16	17809002	17809883	883	LDX	LDX	LDX	LDX
16	17809927	17810333	408	LDX	LDX	LDX	LDX
16	22588802	22588960	160	LDX	LD	LDX	LDX
16	22588995	22589240	247	LDX	LD	LDX	LDX
16	23306267	23306623	358	N/D	LDX	N/D	LDX
16	26150698	26151023	327	LD	LDX	Heterozygous	LDX
16	27001107	27003127	2022	LD	LD	Heterozygous	LD
16	27061229	27061870	643	LD	LDX	Heterozygous	LDX
16	27497431	27498392	963	LD	LD	Heterozygous	LD
16	27613640	27614189	551	LD	LD	Heterozygous	LDX
16	27884302	27885148	848	LD	LD	Heterozygous	LD
16	28116075	28118121	2048	Heterozygous	LD	Heterozygous	LD
16	28244077	28245338	1263	Heterozygous	LDX	Heterozygous	LDX
16	28286493	28290527	4036	Heterozygous	LD	Heterozygous	LD
16	28529798	28530315	519	Heterozygous	LDX	Heterozygous	LD
16	32760976	32761827	853	LD	LD	Heterozygous	LDX
16	32875903	32876995	1094	LD	LD	Heterozygous	LDX
16	36229909	36230301	394	LDX	LDX	LDX	LDX
16	36463708	36463927	221	LDX	LD	LDX	LD
16	36742245	36742493	250	LDX	LDX	LDX	LDX
16	36742595	36743668	1075	LDX	LDX	LDX	LDX
16	37182121	37182503	384	LDX	LDX	LDX	LDX
17	5138468	5139159	693	LD	LD	LD	LD
17	8343379	8343655	278	LD	LD	LD	LD
17	10397973	10398596	625	LD	LD	LD	LD
17	10693553	10694249	698	LD	LD	LD	LD
17	16389870	16390205	337	N/D	LD	N/D	LD
17	22746006	22746127	123	Heterozygous	LD	Heterozygous	LD
17	23974615	23974840	227	Heterozygous	LD	Heterozygous	LD
17	23980608	23981617	1011	Heterozygous	LDX	Heterozygous	LD
17	31402907	31403570	665	N/D	LDX	N/D	LDX
17	31652884	31653158	276	N/D	LDX	N/D	LDX
17	32837051	32837512	463	N/D	LDX	N/D	LDX
17	36254841	36257492	2653	N/D	LDX	N/D	LDX
17	37700225	37700731	508	N/D	LDX	N/D	LDX
17	40446416	40447144	730	LDX	LDX	LD	LD
18	366809	368401	1594	LDX	LDX	LD	LD
18	592323	593081	760	LDX	LDX	LD	LD
18	1635565	1635858	295	LDX	LDX	LD	LDX
18	1639672	1640027	357	LDX	LDX	LD	LD
18	1650356	1651110	756	LDX	LDX	LD	LD
18	1653770	1654501	733	LDX	LDX	LD	LD
18	1655650	1657249	1601	LDX	LDX	LD	LD
18	2653399	2654185	788	LDX	LDX	LD	LD
18	2908252	2909110	860	LDX	LDX	LD	LD
18	2978227	2981117	2892	LDX	LDX	LD	LD
18	3682060	3684786	2728	LDX	LDX	LD	LD
18	3823993	3824489	498	LDX	LDX	LD	LD
18	3981670	3982465	797	LDX	LDX	LD	LD
18	4040003	4042542	2541	LDX	LDX	LD	LD
18	4573468	4574232	766	LDX	LDX	LD	LD
18	5519834	5522189	2357	LDX	LDX	LD	LD
18	5789190	5789693	505	LDX	LDX	LD	LD
18	6016823	6017198	377	LDX	LDX	LD	LD
18	6119756	6120309	555	LDX	LDX	LD	LD
18	6168168	6168613	447	LDX	LDX	LD	LD
18	6365420	6365928	510	LDX	LDX	LD	LD
18	6528206	6529850	1646	LDX	LDX	LD	LD
18	6530360	6531468	1110	LDX	LDX	LD	LD
18	6531745	6534379	2636	LDX	LDX	LD	LD
18	6731150	6731823	675	LDX	LD	LD	LDX
18	7102740	7103552	814	LDX	LDX	LD	LD
18	7104265	7104645	382	LDX	LDX	LD	LD
18	7364523	7364941	420	LDX	LDX	LD	LD
18	7714193	7714501	310	LDX	LD	LD	LD
18	7775342	7776153	813	LDX	LDX	LD	LD
18	8055468	8056093	627	LDX	LDX	LD	N/D
18	8056868	8058617	1751	LDX	LDX	LD	LD
18	8356817	8357784	969	LDX	LDX	LD	LD
18	8400308	8401005	699	LDX	LDX	LD	LD
18	8511268	8512183	917	LDX	LDX	LD	LD
18	8947515	8948615	1102	LDX	LDX	LD	LD
18	8963832	8965257	1427	LDX	LDX	LD	LD
18	9154995	9155919	926	LDX	LDX	LD	LD
18	9359611	9360705	1096	LDX	LDX	LD	LD
18	9364346	9366213	1869	LDX	LDX	LD	LD
18	9385090	9388404	3316	LDX	LDX	LD	LD
18	9389819	9390974	1157	LDX	LDX	LD	LD
18	9431124	9431973	851	LDX	LDX	LD	LD
18	9433540	9434267	729	LDX	LDX	LD	LD
18	9438958	9441166	2210	LDX	LDX	LD	LD
18	9482646	9483521	877	LDX	LDX	LD	LD
18	9727347	9728112	767	LDX	LDX	LD	LD
18	10034717	10035538	823	LDX	LDX	LD	LD
18	10065624	10067130	1508	LDX	LDX	LD	LD
18	10244595	10246236	1643	LDX	LDX	LD	LD
18	10246243	10246657	416	LDX	LDX	LD	LD
18	10248025	10250070	2047	LDX	LDX	LD	LDX
18	10251117	10251843	728	LDX	LDX	LD	LDX
18	10325424	10326126	704	LDX	LDX	LD	LD
18	10537062	10539534	2474	LDX	LDX	LD	LD
18	10562964	10564797	1835	LDX	LDX	LD	LD
18	10593183	10594117	936	LDX	LDX	LD	LD
18	11289239	11290219	982	LDX	LDX	LD	LD
18	11439935	11442433	2500	LDX	LDX	LD	LD
18	11540488	11541621	1135	LDX	LDX	LD	LD
18	11780631	11783529	2900	LDX	LDX	LD	LD
18	12537736	12540946	3212	LDX	LDX	LD	LD
18	12547263	12548387	1126	LDX	LDX	LD	LD
18	12626579	12627534	957	LDX	LDX	LD	LD
18	12652544	12653426	884	LDX	LDX	LD	LD
18	12724660	12725444	786	LDX	LDX	LD	LD
18	13246873	13247453	582	LDX	LDX	LD	LD
18	14267374	14267703	331	LDX	LDX	LD	LD
18	14446946	14448459	1515	LDX	LDX	LD	LD
18	14769284	14769931	649	LDX	LDX	LD	LD
18	14878184	14879129	947	LDX	LDX	LD	LD
18	15216872	15218918	2048	N/D	LDX	LD	LD
18	15351397	15352409	1014	N/D	LDX	LD	LD
18	15458784	15459400	618	N/D	LDX	LD	LD
18	15549786	15550442	658	N/D	LDX	LD	LD
18	15869039	15871835	2798	N/D	LDX	LD	LD
18	16607698	16607940	244	Heterozygous	LDX	LD	LD
18	16647242	16647602	362	Heterozygous	LDX	LD	LD
18	17334977	17335498	523	Heterozygous	LDX	LD	LD
18	18702962	18703646	686	LDX	LDX	LD	LD
18	19262058	19262486	430	LDX	LDX	LD	LDX
18	19464669	19465201	534	LDX	LDX	LD	LD
18	19578615	19582475	3862	LDX	LDX	LD	LD
18	20337578	20338687	1111	LDX	LDX	LD	LD
18	20474178	20474925	749	LDX	LDX	LD	LD
18	20793398	20794369	973	LDX	LDX	LD	LD
18	20825932	20827327	1397	LDX	LD	LD	LD
18	20878565	20880070	1507	LDX	LDX	LD	LD
18	20880601	20881504	905	LDX	LDX	LD	LD
18	20884832	20885536	706	LDX	LDX	LD	LD
18	21414948	21416396	1450	LDX	LDX	LD	LD
18	22252931	22254652	1723	LDX	LDX	LD	LD
18	22383456	22384413	959	LDX	LDX	LD	LD
18	22775484	22778337	2855	LDX	LDX	LD	LD
18	22778368	22780480	2114	LDX	LDX	LD	LD
18	23123416	23125480	2066	LDX	LDX	LD	LD
18	23125719	23127374	1657	LDX	LDX	LD	LD
18	23176685	23177396	713	LDX	LDX	LD	LD
18	23587013	23588797	1786	LDX	LDX	LD	LD
18	23676906	23677195	291	LDX	LDX	LD	LD
18	23964382	23965872	1492	LDX	LDX	LD	LD
18	24496029	24498194	2167	Heterozygous	LDX	LD	LD
18	24503188	24503685	499	Heterozygous	LDX	LD	LD
18	25310960	25312561	1603	LD	LDX	LD	LD
18	25786660	25787475	817	LD	LDX	LD	LDX
18	25833437	25836592	3157	LD	LD	LD	LD
18	26261405	26262639	1236	LD	LD	LD	LD
18	26704384	26705491	1109	LD	LD	LD	LD
18	26735625	26737148	1525	LD	LD	LD	LD
18	26976667	26979892	3227	LD	LD	LD	LD
18	27093713	27094636	925	Heterozygous	LD	LD	LD
18	27098786	27099832	1048	Heterozygous	LD	LD	LD
18	27101882	27104098	2218	Heterozygous	LD	LD	LD
18	27115147	27115997	852	Heterozygous	LD	LD	LD
18	27116029	27116968	941	Heterozygous	LD	LD	LD
18	27185202	27185700	500	Heterozygous	LD	LD	LD
18	27860395	27865137	4744	Heterozygous	LDX	LD	LD
18	28443234	28444998	1766	LDX	LDX	LD	LD
18	29995123	29995768	647	LDX	LDX	LD	LD
18	30063727	30066502	2777	LDX	LDX	LD	LD
18	30660345	30662016	1673	LDX	LDX	LD	LD
18	30687027	30688859	1834	LDX	LDX	LD	LD
18	32123258	32123818	562	LDX	LDX	LD	LD
18	32131082	32132577	1497	LDX	LDX	LD	LD
18	32653561	32655560	2001	LDX	LDX	LD	LD
18	33188933	33190348	1417	LDX	LDX	LD	LD
18	33236333	33236492	161	LDX	LDX	LD	LD
18	35303390	35304280	892	LDX	LDX	LD	LD
18	37380506	37382410	1906	LDX	LDX	LD	LD
18	37781511	37782646	1137	LDX	LDX	LD	LD
18	37792274	37794791	2519	LDX	LDX	LD	LD
18	37932734	37934858	2126	LDX	LDX	LD	LD
18	38139031	38140366	1337	LDX	LDX	LD	LD
18	38148055	38151341	3288	LDX	LDX	LD	LD
18	39246271	39248058	1789	LDX	LDX	LD	LD
18	40289738	40290985	1249	LDX	LDX	LD	LD
18	41401205	41403062	1859	LDX	LDX	LD	LD
18	42059528	42061031	1505	LDX	LDX	LD	LD
18	42061628	42063867	2241	LDX	LDX	LD	LD
18	42211382	42213747	2367	LDX	LDX	LD	LD
18	42260605	42261034	431	LDX	LDX	LD	LD
18	42520486	42521581	1097	LDX	LDX	LD	LD
18	42521647	42524130	2485	LDX	LDX	LD	LD
18	43072536	43074173	1639	LDX	LDX	N/D	LD
18	44867333	44867933	602	LDX	LDX	N/D	LD
18	44869172	44869694	524	LDX	LDX	N/D	LD
18	44896829	44897586	759	LDX	LDX	N/D	LD
18	45225145	45226533	1390	LDX	LDX	LDX	LD
18	45415365	45415805	442	LDX	LDX	LDX	LDX
18	45797111	45798592	1483	LDX	LDX	LDX	LDX
18	46054682	46055195	515	LDX	LDX	LDX	LDX
18	46281096	46282157	1063	LDX	LDX	LDX	LDX
18	46298532	46300145	1615	LDX	LDX	LDX	LDX
18	46309586	46310545	961	LDX	LDX	LDX	LDX
18	47471949	47473914	1967	LDX	LDX	LDX	LDX
18	47668087	47669349	1264	LDX	LDX	LDX	LDX
18	47954949	47955801	854	LDX	LDX	LDX	LDX
18	47957371	47958342	973	LDX	LDX	LDX	LDX
18	48744585	48744899	316	LDX	LDX	LDX	LDX
18	48744915	48745255	342	LDX	LDX	LDX	LDX
18	49080428	49081322	896	LDX	LDX	LDX	LDX
18	49350261	49351348	1089	LDX	LDX	LDX	LDX
18	49571442	49573540	2100	LDX	LDX	LDX	LDX
18	49658587	49658714	129	LDX	LDX	LDX	LDX
18	49863817	49865074	1259	LDX	LDX	LDX	LDX
18	50470948	50471688	742	LDX	LDX	LDX	LDX
18	50494634	50496198	1566	LDX	LDX	LDX	LDX
18	50496744	50500592	3850	LDX	LDX	LDX	LDX
18	50534236	50535436	1202	LDX	LDX	LDX	LDX
18	50629245	50629956	713	LDX	LDX	LDX	LDX
18	50866015	50866853	840	LDX	LDX	LDX	LDX
18	50867077	50868405	1330	LDX	LDX	LDX	LDX
18	51002238	51003255	1019	LDX	LDX	LDX	LDX
18	51129907	51131517	1612	LDX	LDX	LDX	LDX
18	51460660	51461147	489	LDX	LDX	LDX	LDX
18	51791762	51793470	1710	LDX	LDX	LDX	LDX
18	51859808	51863189	3383	LDX	LDX	LDX	LDX
18	51863569	51865119	1552	LDX	LDX	LDX	LDX
18	52042281	52043598	1319	LDX	LD	LDX	LD
18	52325039	52325682	645	LDX	LDX	LDX	LDX
18	52372948	52374361	1415	LDX	LDX	LDX	LDX
18	52450014	52450549	537	LDX	LDX	LDX	LDX
18	53840329	53840506	179	LDX	LDX	LDX	LDX
18	53840778	53844041	3265	LDX	LDX	LDX	LDX
18	53844078	53846294	2218	LDX	LDX	LDX	LDX
18	53847166	53848635	1471	LDX	LDX	LDX	LDX
18	54079730	54080557	829	LDX	LDX	LDX	LDX
18	54087661	54089468	1809	LDX	LDX	LDX	LDX
18	54092609	54093766	1159	LDX	LDX	LDX	LDX
18	54229428	54230456	1030	LDX	LDX	LDX	LDX
18	54304441	54304846	407	LDX	LDX	LDX	LDX
18	54352460	54352888	430	LDX	LDX	LDX	LDX
18	54432149	54433677	1530	LDX	LDX	LDX	LDX
18	54451689	54452160	473	LDX	LDX	LDX	LDX
18	54628494	54628988	496	LDX	LDX	LDX	LDX
18	54830219	54830789	572	LDX	LDX	LDX	LDX
18	55088347	55088681	336	LDX	LDX	LDX	LDX
18	55446125	55446260	137	LDX	LDX	LDX	LDX
18	55642510	55643628	1120	LDX	LDX	LDX	LDX
18	56268932	56269705	775	LDX	LDX	LDX	LDX
18	56345354	56345942	590	LDX	LDX	LDX	LDX
18	56690444	56693297	2855	LDX	LDX	LDX	LDX
18	56822184	56823348	1166	LDX	LDX	LDX	LDX
18	58892441	58892820	381	LDX	LDX	LDX	LDX
18	58892980	58893442	464	LDX	LDX	LDX	LDX
18	59484369	59485561	1194	LDX	LDX	LDX	LDX
18	59996228	59997264	1038	LDX	LDX	LDX	LDX
18	60524636	60525012	378	Heterozygous	LD	LDX	LDX
18	60689542	60689987	447	Heterozygous	LD	LDX	LDX
19	1419941	1420261	322	LD	LD	LDX	LDX
19	1758595	1758874	281	LD	LD	LDX	LDX
19	1953971	1955900	1931	LD	LD	LDX	LDX
19	3003515	3004511	998	LD	LD	LDX	LDX
19	3625968	3626933	967	LD	LD	LDX	LDX
19	3652694	3654286	1594	LD	LD	LDX	LDX
19	3762677	3763748	1073	LD	LD	LDX	LDX
19	3866077	3866692	617	LD	LD	LDX	LDX
19	4118396	4119125	731	LD	LD	LDX	LDX
19	4198033	4198912	881	LD	LD	LDX	LDX
19	4818212	4820669	2459	LD	LD	LDX	LDX
19	5157014	5159241	2229	LD	LD	LDX	LDX
19	5178665	5180315	1652	LD	LD	LDX	LDX
19	5242572	5243047	477	LD	LD	LDX	LDX
19	5959371	5961154	1785	LD	LD	LDX	LDX
19	6182288	6183005	719	LD	LD	LDX	LDX
19	6842741	6843967	1228	LD	LD	LDX	LDX
19	7114222	7115818	1598	LD	LD	LDX	LDX
19	7244333	7245930	1599	LD	LD	LDX	LDX
19	7501632	7502806	1176	LD	LD	LDX	LDX
19	7905280	7905892	614	LD	LD	LDX	LDX
19	8044886	8046496	1612	LD	LD	LDX	LDX
19	8368198	8371424	3228	LD	LD	LDX	LDX
19	8409831	8410865	1036	LD	LD	LDX	LDX
19	8607729	8608948	1221	LD	LD	LDX	LDX
19	8810708	8811224	518	LD	LD	LDX	LDX
19	8882290	8884841	2553	LD	LD	LDX	LDX
19	9122227	9124005	1780	LD	LD	LDX	LDX
19	9406318	9406875	559	LD	LD	LDX	LDX
19	9431349	9433202	1855	LD	LD	LDX	LDX
19	10495556	10496391	837	LD	LD	LDX	LDX
19	10497157	10499043	1888	LD	LD	LDX	LDX
19	10511844	10513121	1279	LD	LD	LDX	LDX
19	10514674	10515289	617	LD	LD	LDX	LDX
19	10516507	10517401	896	LD	LD	LDX	LDX
19	10584223	10585538	1317	LD	LD	LDX	LDX
19	10586125	10587119	996	LD	LD	LDX	LDX
19	11050905	11053215	2312	LD	LD	LDX	LDX
19	11112207	11113136	931	LD	LD	LDX	LDX
19	11677773	11680815	3044	LD	LD	LDX	LDX
19	11945776	11946196	422	LD	LD	LDX	LDX
19	11981671	11984027	2358	LD	LD	LDX	LDX
19	12051236	12053500	2266	LD	LD	LDX	LDX
19	12456930	12459035	2107	LD	LD	LDX	LDX
19	12854045	12856659	2616	LD	LD	LDX	LDX
19	13509504	13512646	3144	LD	LD	LDX	LDX
19	13542461	13543323	864	LD	LD	LDX	LDX
19	13728089	13729960	1873	LD	LD	LDX	LDX
19	14212480	14215511	3033	LD	LD	LDX	LDX
19	17200333	17202452	2121	LD	LD	LDX	LDX
19	17595663	17596525	864	LD	LD	LDX	LDX
19	18636441	18640433	3994	LD	LD	LDX	LDX
19	19921815	19922443	630	LD	LD	LDX	LDX
19	19948072	19948441	371	LD	LD	LDX	LDX
19	20660154	20661400	1248	LD	LD	LDX	LDX
19	20669419	20669834	417	LD	LD	LDX	LDX
19	22868466	22870843	2379	LD	LD	LDX	LDX
19	23074599	23076028	1431	LD	LD	LDX	LDX
19	23254830	23256902	2074	LD	LD	LDX	LDX
19	24211874	24214463	2591	LD	LD	LDX	LDX
19	25112125	25114782	2659	LD	LD	LDX	LDX
19	25520585	25524074	3491	LD	LD	LDX	LDX
19	26660977	26664709	3734	LD	LD	LDX	LDX
19	27083634	27083973	341	LD	LD	LDX	LDX
19	28753441	28756380	2941	LD	LD	LDX	LDX
19	29127642	29128354	714	LD	LDX	LDX	LDX
19	29128413	29128633	222	LD	LD	LDX	LDX
19	29603254	29604845	1593	LD	LD	LDX	LDX
19	29654379	29654812	435	LD	LD	LDX	LDX
19	30049180	30050741	1563	LD	LD	LDX	LDX
19	30428485	30430473	1990	LD	LD	LDX	LDX
19	30455785	30456505	722	LD	LD	LDX	LDX
19	30529128	30530197	1071	LD	LD	LDX	LDX
19	31180845	31181649	806	LD	LD	LDX	LDX
19	32186279	32186633	356	LD	LD	LDX	LDX
19	32687747	32690213	2468	LD	LD	LDX	LDX
19	32853315	32854052	739	LD	LD	LDX	LDX
19	33084988	33086657	1671	LD	LD	LDX	LDX
19	33443957	33445072	1117	LD	LD	LDX	LDX
19	35253518	35253835	319	LD	LD	LDX	LDX
19	35259959	35260566	609	LD	LD	LDX	LDX
19	35394562	35395667	1107	LD	LD	LDX	LDX
19	35516391	35518036	1647	LD	LD	LDX	LDX
19	35925573	35926465	894	LD	LD	LDX	LDX
19	36078901	36079781	882	LD	LD	LDX	LDX
19	36174393	36175372	981	LD	LD	LDX	LDX
19	36306642	36307534	894	LD	LD	LDX	LDX
19	36640932	36642446	1516	LD	LD	LDX	LDX
19	38584594	38585055	463	LD	LD	LD	LD
19	39304528	39304960	434	LD	LD	LD	LD
19	39470992	39471597	607	LD	LD	LD	LDX
19	39896387	39896670	285	LD	LD	LD	LD
19	40604242	40605168	928	Heterozygous	LDX	Heterozygous	LDX
19	42852222	42853644	1424	N/D	LD	N/D	LD
19	45510543	45511431	890	N/D	LD	N/D	LDX
19	50530071	50531368	1299	N/D	LD	N/D	LD
20	204429	205284	857	LD	LD	LD	LD
20	729357	729839	484	LD	LD	LD	LD
20	993286	994848	1564	LD	LD	LD	LD
20	1273879	1275991	2114	LD	LD	LD	LD
20	1336937	1337382	447	LD	LD	LD	LD
20	1341929	1342433	506	LD	LD	LD	LD
20	1369497	1371049	1554	LD	LD	LD	LD
20	1549058	1551182	2126	LD	LD	LD	LD
20	3103759	3105368	1611	LD	LD	LD	LD
20	3184130	3185041	913	LD	LD	LD	LD
20	3185783	3187708	1927	LD	LD	LD	LD
20	3523246	3523756	512	LD	LD	LD	LD
20	3530013	3531201	1190	LD	LD	LD	LD
20	3682679	3683374	697	LD	LD	LD	LD
20	4122940	4123622	684	LD	LD	LD	LD
20	4123730	4125575	1847	LD	LD	LD	LD
20	4186412	4187707	1297	LD	LD	LD	LD
20	5116074	5116678	606	LD	LD	Heterozygous	LD
20	5922851	5924127	1278	LD	LD	Heterozygous	LD
20	5957632	5958254	624	LD	LD	Heterozygous	LD
20	5978573	5980545	1974	LD	LD	Heterozygous	LD
20	6050117	6051300	1185	LD	LD	LD	LD
20	6893487	6895875	2390	LD	LD	LD	LD
20	7549233	7549966	735	Heterozygous	LD	Heterozygous	LD
20	7583731	7584704	975	Heterozygous	LD	Heterozygous	LD
20	7651965	7652287	324	Heterozygous	LD	Heterozygous	LD
20	7914153	7914972	821	Heterozygous	LD	Heterozygous	LD
20	9020651	9020925	276	Heterozygous	LD	Heterozygous	LD
20	9020942	9021478	538	Heterozygous	LD	Heterozygous	LD
20	10160679	10161844	1167	LD	LD	LD	LD
20	10169601	10172597	2998	LD	LD	LD	LD
20	10728975	10729175	202	LD	LD	LD	LD
20	10927917	10928744	829	LD	LD	LD	LD
20	11225324	11229337	4015	LD	LD	LD	LD
20	11464438	11465348	912	LD	LD	LD	LD
20	11745656	11747551	1897	LD	LD	LD	LD
20	11827296	11829326	2032	LD	LD	LD	LD
20	12162816	12164093	1279	LD	LD	LD	LD
20	12282185	12283324	1141	LD	LD	LD	LD
20	13484122	13485183	1063	Heterozygous	LDX	Heterozygous	LD
20	16657380	16658503	1125	Heterozygous	LD	Heterozygous	LD
20	16850036	16850958	924	Heterozygous	LD	Heterozygous	LD
20	16861117	16861923	808	Heterozygous	LD	Heterozygous	LD
20	16887561	16887897	338	Heterozygous	LD	Heterozygous	LD
20	17035560	17035981	423	Heterozygous	LD	Heterozygous	LD
20	17590684	17591655	973	Heterozygous	LD	Heterozygous	LD
20	20315314	20317640	2328	Heterozygous	LD	Heterozygous	LD
20	22069387	22069814	429	Heterozygous	LD	Heterozygous	LD
20	22378426	22379341	917	Heterozygous	LD	Heterozygous	LD
20	23486678	23486918	242	LD	LDX	LD	LDX
20	24617914	24620766	2854	LD	LD	LD	LD
20	24972468	24973659	1193	LD	LD	LD	LD
20	25487121	25487975	856	LD	LD	LD	LD
20	26129251	26130204	955	LD	LD	LD	LD
20	26271987	26272383	398	LD	LD	LD	LD
20	26272452	26274162	1712	LD	LD	LD	LD
20	26525290	26526328	1040	LD	LD	LD	LD
20	26652847	26654210	1365	LD	LD	LD	LD
20	27140096	27142319	2225	LD	LD	LD	LD
20	27183591	27184268	679	LD	LD	LD	LD
20	27305681	27306173	494	LD	LD	LD	LD
20	27616479	27618484	2007	LD	LD	LD	LD
20	27808099	27808735	638	LD	LD	LD	LD
20	28419594	28420594	1002	LD	LD	LD	LD
20	28450786	28451225	441	LD	LD	LD	LD
20	28578772	28579692	922	LD	LD	LD	LD
20	28579755	28580239	486	LD	LD	LD	LD
20	28974349	28975530	1183	LD	LD	LD	LD
20	29055815	29060097	4284	LD	LD	LD	LD
20	29302429	29302761	334	LD	LD	LD	LD
20	29493346	29494762	1418	LD	LD	LD	LD
20	29671722	29674008	2288	LD	LD	LD	LD
20	29710744	29710898	156	LD	LD	LD	LD
20	29807906	29809678	1774	LD	LD	LD	LD
20	29838754	29841730	2978	LD	LD	LD	LD
20	29846731	29847303	574	LD	LD	LD	LD
20	29847861	29848584	725	LD	LD	LD	LD
20	30044521	30046095	1576	LD	LD	LD	LD
20	30061769	30062285	518	LD	LD	LD	LD
20	30753245	30753828	585	LD	LD	LD	LD
20	30842224	30843769	1547	LD	LD	LD	LD
20	30844025	30844273	250	LD	LD	LD	LD
20	30844345	30844818	475	LD	LDX	LD	LD
20	30951250	30952230	982	LD	LD	LD	LD
20	30953540	30954027	489	LD	LD	LD	LD
20	31188170	31188720	552	LD	LD	LD	LD
20	31189602	31190561	961	LD	LD	LD	LD
20	32135252	32135681	431	LD	LD	LD	LD
20	32476010	32477611	1603	LD	LD	LD	LD
20	32700703	32701405	704	LD	LD	LD	LD
20	33234468	33236351	1885	LD	LD	LDX	LD
20	33236480	33237757	1279	LD	LD	LDX	LD
20	33240362	33241250	890	LD	LD	LDX	LD
20	33314386	33315292	908	LD	LD	LDX	LDX
20	33431079	33432201	1124	LD	LD	LDX	LDX
20	33521991	33522945	956	LD	LD	LDX	LDX
20	34811436	34812875	1441	LD	LD	LDX	LDX
20	34895855	34896475	622	LD	LD	LDX	LDX
20	35887980	35888799	821	LD	LD	LDX	LDX
20	43067252	43067773	523	LDX	LD	LDX	LDX
20	45297378	45298030	654	LD	LD	Heterozygous	LDX
20	46667786	46668669	885	LD	LDX	Heterozygous	LDX

## Sheet: Supplementary Table 7
Supplementary Table 7. This table includes 1,416 C-DMRs and the location of the methylQTL identified by linkage mapping
Note: the coordinate is 0-base and the start and end positions are inclusive
chromosome	start	end	methylQTL marker name	methylQTL chromosome	methylQTL location (cM)	LOD score	Broad-sense Heritability (%)
1	477136	478494	BARC-035199-07136	1	12.824	12.0464	48.7464
1	1601788	1604861	BARC-035199-07136	1	12.824	11.8281	48.1217
1	1662548	1663198	BARC-045297-08928	1	16.723	14.6135	55.5505
1	2042253	2043575	BARC-045297-08928	1	16.723	9.41318	40.6834
1	2483823	2484606	BARC-030973-06982	1	33.542	6.12811	28.8238
1	2484657	2484818	BARC-045297-08928	1	16.723	7.79846	35.1238
1	2773328	2773521	BARC-030973-06982	1	33.542	5.31097	25.7897
1	3261204	3262067	BARC-030973-06982	1	33.542	11.6571	47.627
1	3271973	3272526	BARC-030973-06982	1	33.542	9.89101	42.2353
1	3677243	3677645	BARC-030973-06982	1	33.542	13.7344	53.3285
1	3740998	3743357	BARC-030973-06982	1	33.542	13.6276	53.0512
1	4119894	4120448	NA	NA	NA	NA	NA
1	4556416	4557165	BARC-030973-06982	1	33.542	18.418	64.009
1	4693249	4694779	BARC-030973-06982	1	33.542	15.7249	58.2087
1	4772472	4774088	BARC-030973-06982	1	33.542	12.9353	51.2127
1	4774829	4776085	BARC-030973-06982	1	33.542	10.6793	44.7073
1	4777287	4778539	BARC-030973-06982	1	33.542	10.9251	45.4564
1	5456420	5456762	BARC-030973-06982	1	33.542	6.07104	28.5981
1	8381455	8383676	BARC-062007-17609	1	41.578	13.1866	51.8883
1	9453109	9453418	BARC-062007-17609	1	41.578	15.3344	57.2932
1	9843295	9844095	BARC-062007-17609	1	41.578	13.5528	52.856
1	11128532	11130036	BARC-062007-17609	1	41.578	12.1139	48.938
1	11292319	11292844	BARC-062007-17609	1	41.578	5.57691	26.6134
1	12091287	12092303	BARC-062007-17609	1	41.578	11.609	47.4871
1	12254282	12254949	BARC-062007-17609	1	41.578	10.7432	44.9029
1	12740015	12741415	BARC-030973-06982	1	33.542	6.16451	28.9674
1	14249238	14249811	BARC-062007-17609	1	41.578	13.9872	53.9788
1	17980548	17981384	BARC-062007-17609	1	41.578	11.9094	48.3553
1	23131018	23132867	BARC-062007-17609	1	41.578	14.1246	54.3281
1	26214578	26214944	BARC-062007-17609	1	41.578	8.37668	37.1721
1	27115399	27116321	BARC-062007-17609	1	41.578	10.0868	42.8594
1	28508123	28508394	NA	NA	NA	NA	NA
1	29272848	29276617	BARC-062007-17609	1	41.578	13.1876	51.891
1	29507124	29508091	BARC-062007-17609	1	41.578	12.7669	50.7548
1	29713466	29714033	BARC-062007-17609	1	41.578	12.0054	48.6296
1	31067870	31068070	BARC-062007-17609	1	41.578	9.33891	40.4385
1	32242391	32243872	BARC-062007-17609	1	41.578	13.516	52.7597
1	34354250	34354705	BARC-062007-17609	1	41.578	12.3955	49.7294
1	36696016	36697412	BARC-062007-17609	1	41.578	16.664	60.3305
1	36702736	36703751	BARC-062007-17609	1	41.578	18.8426	64.847
1	37094529	37095137	BARC-062007-17609	1	41.578	19.9822	67.001
1	37623328	37623687	BARC-062007-17609	1	41.578	15.1198	56.7818
1	37634325	37635763	BARC-062007-17609	1	41.578	13.5658	52.8901
1	37909880	37911753	BARC-062007-17609	1	41.578	14.9003	56.2522
1	38734326	38734793	BARC-062007-17609	1	41.578	14.0186	54.0587
1	38981370	38982147	BARC-062007-17609	1	41.578	11.3824	46.8228
1	39198869	39199480	BARC-062007-17609	1	41.578	15.2034	56.9818
1	39200424	39202501	BARC-062007-17609	1	41.578	15.9834	58.8037
1	39265900	39266694	BARC-062007-17609	1	41.578	16.083	59.0308
1	39317110	39318463	BARC-062007-17609	1	41.578	14.0291	54.0856
1	39978258	39978640	BARC-062007-17609	1	41.578	16.0299	58.9098
1	40064338	40065907	BARC-062007-17609	1	41.578	18.9852	65.1242
1	40997203	41000396	BARC-062007-17609	1	41.578	17.1776	61.4448
1	41457107	41457952	BARC-062007-17609	1	41.578	16.4031	59.752
1	41621800	41622879	BARC-062007-17609	1	41.578	17.3272	61.7637
1	42167196	42168453	BARC-062007-17609	1	41.578	16.0035	58.8496
1	42247131	42247978	BARC-062007-17609	1	41.578	18.1168	63.4026
1	42275538	42277299	BARC-062007-17609	1	41.578	17.8467	62.8499
1	43663500	43663912	BARC-062007-17609	1	41.578	9.38228	40.5816
1	43674413	43676132	BARC-062007-17609	1	41.578	11.5022	47.175
1	43687550	43687937	NA	NA	NA	NA	NA
1	43953189	43954884	BARC-062007-17609	1	41.578	11.6377	47.5709
1	43955442	43956358	BARC-062007-17609	1	41.578	9.99071	42.554
1	44401879	44402246	NA	NA	NA	NA	NA
1	44461228	44461897	BARC-010999-00814	1	52.713	8.44717	37.4174
1	44780606	44781056	BARC-062007-17609	1	41.578	8.56352	37.8201
1	46423708	46424119	BARC-010999-00814	1	52.713	11.9566	48.4902
1	48348923	48349837	BARC-010999-00814	1	52.713	7.62077	34.481
1	48477138	48478039	BARC-010999-00814	1	52.713	17.9478	63.0578
1	49315711	49315900	BARC-024909-10358	1	54.864	16.7259	60.4664
1	49320958	49321633	BARC-024909-10358	1	54.864	17.2188	61.533
1	49570479	49571257	BARC-065113-19102	1	59.029	16.9453	60.9447
1	49992292	49992636	BARC-053519-11885	1	60.624	14.6021	55.9597
1	55257575	55257973	NA	NA	NA	NA	NA
1	55420018	55421158	NA	NA	NA	NA	NA
2	457709	458531	BARC-041773-08087	2	3.544	13.2023	51.9303
2	1434182	1435276	BARC-041773-08087	2	3.544	12.849	50.9787
2	4215187	4216073	BARC-063263-18286	2	28.412	13.1182	51.7054
2	4758597	4758901	BARC-016573-02145	2	29.984	10.7813	45.0193
2	5835339	5836782	BARC-056237-14178	2	30.668	9.68226	41.5624
2	6356063	6356692	BARC-063205-18270	2	36.115	18.1584	63.487
2	8292599	8294651	BARC-025955-05182	2	47.93	18.9317	65.0205
2	8692023	8692517	BARC-063497-18380	2	44.461	7.44967	33.8561
2	9143437	9146323	BARC-016079-02059	2	48.5	16.3829	59.7068
2	9146353	9146682	BARC-025955-05182	2	47.93	14.2095	54.5428
2	9151854	9153357	BARC-016079-02059	2	48.5	13.4632	52.6211
2	9158286	9160908	BARC-016079-02059	2	48.5	15.7125	58.18
2	9290967	9292100	BARC-016079-02059	2	48.5	15.0268	56.5581
2	9777220	9778535	BARC-016079-02059	2	48.5	15.9349	58.6928
2	9779233	9782233	BARC-016079-02059	2	48.5	15.8257	58.4417
2	10028646	10029613	BARC-016079-02059	2	48.5	14.6366	55.6074
2	11664475	11665537	BARC-016079-02059	2	48.5	10.1059	42.9199
2	12897371	12897864	BARC-031301-07041	2	65.18	10.5708	44.3736
2	13094737	13095149	BARC-031301-07041	2	65.18	10.3143	43.576
2	14408295	14408732	BARC-031301-07041	2	65.18	10.3181	43.588
2	14408734	14408976	BARC-031301-07041	2	65.18	11.015	46.1308
2	15756443	15758146	BARC-014233-03138	2	82.225	16.4846	59.9335
2	16100498	16101754	BARC-014233-03138	2	82.225	6.60407	30.6789
2	16188856	16190132	BARC-014233-03138	2	82.225	17.7172	62.582
2	18929141	18929950	BARC-014233-03138	2	82.225	16.1254	59.1271
2	19306154	19308620	BARC-014233-03138	2	82.225	17.2332	61.5636
2	20236581	20237058	BARC-014233-03138	2	82.225	17.5743	62.2841
2	21543259	21544248	BARC-014233-03138	2	82.225	15.0813	56.6893
2	26832998	26833518	NA	NA	NA	NA	NA
2	27432065	27433474	BARC-014233-03138	2	82.225	16.5698	60.1226
2	27844396	27845211	BARC-014233-03138	2	82.225	15.4924	57.6661
2	29277109	29278447	BARC-014233-03138	2	82.225	18.3553	63.8838
2	29840727	29841316	BARC-014233-03138	2	82.225	18.5356	64.2432
2	29987283	29987635	BARC-014233-03138	2	82.225	17.4782	62.0825
2	30236088	30237967	BARC-014233-03138	2	82.225	19.4408	65.9947
2	30248604	30251938	BARC-014233-03138	2	82.225	21.6687	69.9488
2	30413939	30415127	BARC-014233-03138	2	82.225	19.9669	66.973
2	30491136	30491735	NA	NA	NA	NA	NA
2	30554439	30555208	BARC-014233-03138	2	82.225	16.9923	61.0464
2	30558867	30560214	BARC-061653-17307	2	83.008	20.049	67.123
2	30732846	30734349	BARC-014233-03138	2	82.225	21.3231	69.367
2	30815812	30817929	BARC-014233-03138	2	82.225	18.8866	64.9327
2	31125107	31126008	BARC-014233-03138	2	82.225	19.9524	66.9463
2	31943692	31945204	BARC-014233-03138	2	82.225	20.3978	67.7533
2	33514243	33514827	BARC-014233-03138	2	82.225	14.4655	55.1839
2	34090374	34091441	BARC-014233-03138	2	82.225	18.6713	64.5113
2	35086406	35087800	BARC-060135-16407	2	83.384	17.2076	61.509
2	35118807	35119675	BARC-063685-18434	2	84.305	7.57571	34.317
2	35498206	35498984	BARC-063685-18434	2	84.305	19.5173	66.1387
2	35977956	35979489	BARC-010849-00771	2	83.356	16.5883	60.1635
2	36442343	36444225	BARC-014233-03138	2	82.225	20.5832	68.0831
2	37115221	37115346	BARC-030195-06829	2	85.835	14.1057	54.2802
2	37162626	37164361	BARC-014233-03138	2	82.225	18.5553	64.2822
2	37662745	37663356	BARC-063685-18434	2	84.305	17.9024	62.9646
2	37845635	37847462	BARC-030195-06829	2	85.835	13.3331	52.2779
2	38728971	38732072	BARC-060135-16407	2	83.384	20.724	68.3315
2	39015805	39016594	BARC-063685-18434	2	84.305	18.3634	63.8999
2	39023599	39023954	BARC-060135-16407	2	83.384	18.9349	65.0266
2	39104340	39105381	BARC-010849-00771	2	83.356	19.5334	66.1689
2	39445062	39445914	BARC-014233-03138	2	82.225	7.03354	32.3112
2	39821214	39822448	BARC-030195-06829	2	85.835	13.1049	51.6697
2	39940403	39941056	BARC-063685-18434	2	84.305	11.7382	47.8623
2	40167719	40168523	BARC-060135-16407	2	83.384	20.4559	67.857
2	40261355	40262225	BARC-030195-06829	2	85.835	15.3468	57.3226
2	40301225	40301890	BARC-060135-16407	2	83.384	14.6124	55.5476
2	40320646	40321492	BARC-060135-16407	2	83.384	14.4381	55.1157
2	40553146	40554871	BARC-063685-18434	2	84.305	16.6068	60.2043
2	40724603	40726118	BARC-030195-06829	2	85.835	15.2498	57.0922
2	40739851	40740742	BARC-030195-06829	2	85.835	18.4334	64.0398
2	40795238	40800346	BARC-063685-18434	2	84.305	17.3527	61.8176
2	40941522	40942646	BARC-063685-18434	2	84.305	19.1226	65.389
2	41158801	41159978	BARC-030195-06829	2	85.835	18.1956	63.5622
2	41439593	41440606	BARC-030195-06829	2	85.835	17.36	61.8331
2	41660521	41662288	BARC-030195-06829	2	85.835	15.3698	57.3771
2	41662597	41663818	BARC-030195-06829	2	85.835	14.9055	56.2647
2	41709634	41710842	BARC-030195-06829	2	85.835	14.9594	56.3955
2	41724111	41725476	BARC-030195-06829	2	85.835	13.6885	53.2096
2	41974200	41975186	BARC-030195-06829	2	85.835	15.9236	58.6668
2	41976350	41977349	BARC-030195-06829	2	85.835	14.7149	55.7998
2	42992469	42993773	BARC-060163-16427	2	94.037	14.1247	54.3285
2	43249733	43250129	BARC-060163-16427	2	94.037	14.615	55.5541
2	43250131	43250770	BARC-060163-16427	2	94.037	14.8794	56.2014
2	43250839	43251174	BARC-060163-16427	2	94.037	16.3564	59.6475
2	43251176	43251622	BARC-060163-16427	2	94.037	16.4609	59.8809
2	43251741	43251946	BARC-060163-16427	2	94.037	13.4151	52.4944
2	43252379	43253612	BARC-060163-16427	2	94.037	14.4178	55.0652
2	43253615	43254296	BARC-060163-16427	2	94.037	13.5425	52.829
2	43254311	43255380	BARC-060163-16427	2	94.037	14.7177	55.8066
2	43255402	43255942	BARC-060163-16427	2	94.037	12.9066	51.135
2	43255994	43256187	BARC-060163-16427	2	94.037	12.185	49.1388
2	43395128	43396792	BARC-060163-16427	2	94.037	20.0689	67.1594
2	43740600	43741625	BARC-060163-16427	2	94.037	9.47582	40.8892
2	51652994	51654759	BARC-039799-07588	2	131.851	10.8217	45.1425
3	27464	28066	BARC-029963-06759	3	13.404	6.87833	31.7257
3	65881	66228	BARC-029963-06759	3	13.404	5.68874	27.0673
3	66233	66414	BARC-029963-06759	3	13.404	5.38009	25.8076
3	520260	521216	BARC-029963-06759	3	13.404	7.39719	33.6632
3	3327225	3328166	BARC-064351-18627	3	23.323	18.2995	63.7716
3	3489185	3489966	BARC-064351-18627	3	23.323	18.0107	63.1864
3	4718057	4719471	BARC-064351-18627	3	23.323	15.8281	58.4472
3	4878008	4878604	BARC-064351-18627	3	23.323	14.7548	55.8976
3	5087745	5089008	BARC-064351-18627	3	23.323	15.0256	56.5553
3	5145017	5146480	BARC-064351-18627	3	23.323	14.3278	54.8403
3	5811126	5812300	BARC-016199-02307	3	25.967	15.8425	58.4804
3	5969096	5969838	BARC-016199-02307	3	25.967	14.9935	56.4778
3	6158452	6159073	BARC-016199-02307	3	25.967	13.1107	51.6852
3	6422905	6424153	BARC-016199-02307	3	25.967	13.7524	53.3752
3	6431794	6432607	BARC-016199-02307	3	25.967	14.4955	55.2585
3	6480849	6481696	BARC-016199-02307	3	25.967	13.4013	52.458
3	7010695	7013346	BARC-016199-02307	3	25.967	12.9711	51.3095
3	7027847	7029251	BARC-057823-14942	3	28.457	11.3232	46.6479
3	7086743	7087501	BARC-016199-02307	3	25.967	13.2491	52.0548
3	7109510	7110780	BARC-016199-02307	3	25.967	13.5448	52.8352
3	7653567	7653902	BARC-057823-14942	3	28.457	12.5188	50.0721
3	7755673	7757404	BARC-057823-14942	3	28.457	12.2262	49.255
3	8167214	8168995	BARC-057823-14942	3	28.457	14.4835	55.2286
3	8205162	8205992	BARC-057823-14942	3	28.457	16.4461	59.848
3	8569305	8570497	BARC-057823-14942	3	28.457	16.1897	59.2727
3	8577768	8579585	BARC-057823-14942	3	28.457	15.0447	56.6014
3	9088373	9091402	BARC-057823-14942	3	28.457	16.9732	61.0052
3	9235264	9236125	BARC-057823-14942	3	28.457	9.86471	42.151
3	9888234	9889548	BARC-057823-14942	3	28.457	12.2959	49.4508
3	10308050	10309784	BARC-057823-14942	3	28.457	16.1858	59.2639
3	10974654	10975854	BARC-057823-14942	3	28.457	14.0383	54.1091
3	11855068	11856176	BARC-057823-14942	3	28.457	14.1689	54.4402
3	11891734	11891997	BARC-057823-14942	3	28.457	10.9605	45.5633
3	12153611	12155801	BARC-057823-14942	3	28.457	15.8506	58.499
3	12637641	12638210	BARC-057823-14942	3	28.457	15.3465	57.322
3	12649448	12650819	BARC-057823-14942	3	28.457	13.9206	53.8083
3	12713083	12714201	BARC-057823-14942	3	28.457	15.2386	57.0656
3	12759770	12761915	BARC-057823-14942	3	28.457	16.774	60.5717
3	12794034	12797196	BARC-057823-14942	3	28.457	14.2003	54.5196
3	13226584	13228542	BARC-057823-14942	3	28.457	16.1387	59.1571
3	13926819	13928017	BARC-057823-14942	3	28.457	16.0036	58.8499
3	14542191	14542943	BARC-057823-14942	3	28.457	15.175	56.9139
3	14998440	14998908	BARC-057823-14942	3	28.457	15.7613	58.293
3	15299520	15301308	BARC-057823-14942	3	28.457	15.5745	57.8583
3	15360389	15361217	BARC-057823-14942	3	28.457	12.8064	50.8627
3	17226746	17229015	BARC-057823-14942	3	28.457	11.8178	48.0921
3	18610365	18611103	BARC-057823-14942	3	28.457	10.06	42.7745
3	19273142	19273823	BARC-057823-14942	3	28.457	14.1256	54.3307
3	20754023	20754381	BARC-057823-14942	3	28.457	12.9803	51.3346
3	20815477	20816820	BARC-057823-14942	3	28.457	12.3402	49.575
3	21061973	21062383	BARC-057823-14942	3	28.457	13.8404	53.6024
3	21892623	21893194	BARC-046796-12751	3	27.779	12.0004	48.6154
3	24976873	24978679	BARC-057823-14942	3	28.457	10.613	44.5035
3	25242601	25244277	BARC-057823-14942	3	28.457	8.80083	38.6334
3	25244516	25244809	BARC-057823-14942	3	28.457	10.6091	44.4915
3	25932871	25935296	BARC-057823-14942	3	28.457	9.96537	42.4732
3	26418688	26419257	BARC-057823-14942	3	28.457	8.96119	39.177
3	27395882	27397936	BARC-057823-14942	3	28.457	10.1002	42.9019
3	28001726	28002666	BARC-057823-14942	3	28.457	10.4384	43.9634
3	31339021	31339146	BARC-057823-14942	3	28.457	7.72286	34.8511
3	32031739	32031931	NA	NA	NA	NA	NA
3	32511674	32514222	BARC-057823-14942	3	28.457	10.0971	42.8922
3	34547601	34547880	BARC-057823-14942	3	28.457	6.95186	32.0037
3	34745044	34745823	BARC-057823-14942	3	28.457	8.35179	37.0853
3	34913988	34916413	BARC-057823-14942	3	28.457	8.2637	36.7771
3	35074295	35074966	BARC-057823-14942	3	28.457	6.95333	32.0092
3	35160635	35161817	BARC-057823-14942	3	28.457	7.70921	34.8017
3	35415323	35416059	BARC-057823-14942	3	28.457	5.84817	27.7097
3	43521533	43522166	NA	NA	NA	NA	NA
3	44576200	44577204	BARC-014699-01621	3	85.18	10.0527	42.7513
3	44667749	44667907	BARC-014699-01621	3	85.18	6.92742	31.9114
3	45938742	45940607	BARC-049907-09240	3	91.756	15.8652	58.5327
3	46847318	46848053	BARC-054507-12102	3	92.72	9.94773	42.4168
4	24566	25808	BARC-028321-05831	4	4.856	19.4009	65.9193
4	169690	170069	NA	NA	NA	NA	NA
4	640685	640875	BARC-028321-05831	4	4.856	10.0153	42.6323
4	1646979	1648218	BARC-021961-04241	4	10.513	12.718	50.6211
4	2400927	2401513	BARC-054289-12451	4	12.185	13.7321	53.3227
4	4287305	4287467	BARC-021219-04011	4	20.252	15.6162	57.9557
4	4503956	4504826	NA	NA	NA	NA	NA
4	8264080	8264522	NA	NA	NA	NA	NA
4	8275000	8276721	BARC-046068-10219	4	47.068	6.12612	28.816
4	8835144	8835774	BARC-046068-10219	4	47.068	10.4794	44.0907
4	9013704	9014437	BARC-046068-10219	4	47.068	9.61812	41.354
4	9155643	9156095	BARC-046068-10219	4	47.068	11.8204	48.0997
4	9677045	9677568	BARC-042719-08395	4	50.769	16.9891	61.0396
4	10397265	10397538	BARC-042719-08395	4	50.769	12.3531	49.6111
4	10956439	10959165	BARC-042719-08395	4	50.769	11.9629	48.5082
4	11016478	11017595	BARC-042719-08395	4	50.769	18.2729	63.7181
4	11433520	11434016	BARC-042719-08395	4	50.769	16.765	60.552
4	11464002	11465516	BARC-042719-08395	4	50.769	18.2265	63.6247
4	11618842	11620326	BARC-042719-08395	4	50.769	15.7002	58.1513
4	11701239	11703823	BARC-042719-08395	4	50.769	15.9342	58.6912
4	11714859	11715950	BARC-042719-08395	4	50.769	13.8222	53.5554
4	11913307	11914163	BARC-042719-08395	4	50.769	14.6058	55.5315
4	11967555	11969888	BARC-042719-08395	4	50.769	15.2387	57.0659
4	11970052	11975567	BARC-042719-08395	4	50.769	15.9625	58.756
4	13290085	13290763	BARC-042719-08395	4	50.769	15.3912	57.4277
4	13487638	13489023	BARC-042719-08395	4	50.769	15.9132	58.6429
4	14445955	14446945	BARC-042719-08395	4	50.769	17.3132	61.7339
4	15308354	15309848	BARC-057827-14943	4	52.082	15.0505	56.6151
4	15347180	15347561	BARC-042719-08395	4	50.769	13.8987	53.7523
4	15406081	15408534	BARC-057827-14943	4	52.082	15.3215	57.2627
4	15518962	15519526	BARC-042719-08395	4	50.769	16.1468	59.1754
4	15950970	15951314	NA	NA	NA	NA	NA
4	16011422	16012643	BARC-042719-08395	4	50.769	14.591	55.4949
4	16186942	16189108	BARC-057827-14943	4	52.082	14.4543	55.1562
4	16612864	16614152	BARC-057827-14943	4	52.082	13.8827	53.711
4	16673981	16676862	BARC-057827-14943	4	52.082	14.6722	55.6951
4	16861937	16863473	BARC-042719-08395	4	50.769	14.1142	54.3018
4	16917849	16918730	BARC-042719-08395	4	50.769	15.107	56.7509
4	17057180	17060661	BARC-042719-08395	4	50.769	15.2171	57.0144
4	17416086	17416875	BARC-057827-14943	4	52.082	14.2726	54.7017
4	17473512	17474776	BARC-057827-14943	4	52.082	15.8113	58.4086
4	18146915	18147724	BARC-057827-14943	4	52.082	16.1034	59.077
4	18317228	18317589	NA	NA	NA	NA	NA
4	18376426	18379088	BARC-057827-14943	4	52.082	15.8359	58.4652
4	19145824	19146513	BARC-057827-14943	4	52.082	10.5151	44.2013
4	19180052	19181211	BARC-042719-08395	4	50.769	14.9099	56.2755
4	19256229	19258485	BARC-057827-14943	4	52.082	16.6423	60.2825
4	19582466	19583588	BARC-057827-14943	4	52.082	15.586	57.8852
4	22297764	22298956	BARC-057827-14943	4	52.082	15.475	57.6251
4	22301231	22302395	BARC-057827-14943	4	52.082	15.4635	57.598
4	24417386	24420266	BARC-042719-08395	4	50.769	14.447	55.1379
4	25091063	25092446	BARC-057827-14943	4	52.082	15.8638	58.5296
4	27847428	27848481	BARC-042719-08395	4	50.769	16.1642	59.215
4	27943765	27945850	BARC-057827-14943	4	52.082	13.619	53.0289
4	31920050	31922224	BARC-057827-14943	4	52.082	15.76	58.2899
4	32009355	32011764	BARC-042719-08395	4	50.769	15.4385	57.5392
4	33036828	33037833	NA	NA	NA	NA	NA
4	33088461	33091320	BARC-057827-14943	4	52.082	16.0425	58.9387
4	34126898	34127836	BARC-057867-14973	20	29.164	18.3984	63.9699
4	34137066	34137946	BARC-053829-12063	20	30.134	17.1249	61.3319
4	34505494	34506654	BARC-057867-14973	20	29.164	17.477	62.0801
4	35140161	35143134	BARC-057827-14943	4	52.082	15.0588	56.6352
4	36428175	36429026	BARC-042719-08395	4	50.769	14.4987	55.2664
4	36838098	36838604	BARC-057827-14943	4	52.082	15.4337	57.5279
4	37596478	37598496	BARC-042719-08395	4	50.769	14.7051	55.7758
4	37599110	37600603	BARC-042719-08395	4	50.769	13.894	53.7402
4	37825701	37826262	BARC-042719-08395	4	50.769	12.6298	50.3789
4	38134541	38135090	BARC-042719-08395	4	50.769	11.4587	47.0474
4	38182564	38182919	BARC-042719-08395	4	50.769	12.4168	49.7888
4	38762446	38764137	BARC-042719-08395	4	50.769	15.5551	57.813
4	39011937	39012262	BARC-057827-14943	4	52.082	14.5782	55.4632
4	39191408	39194279	BARC-042719-08395	4	50.769	15.4698	57.6129
4	39642507	39643942	BARC-042719-08395	4	50.769	10.8337	45.1791
4	39688801	39689015	BARC-042719-08395	4	50.769	9.39991	40.6397
4	39692367	39694557	BARC-042719-08395	4	50.769	11.9337	48.4249
4	39861119	39864311	BARC-042719-08395	4	50.769	14.4929	55.252
4	40382685	40386589	BARC-057827-14943	4	52.082	15.5488	57.7983
4	40425105	40426096	BARC-042719-08395	4	50.769	12.8749	51.049
4	40542531	40543609	BARC-042719-08395	4	50.769	13.2122	51.9565
4	41090798	41091373	BARC-058411-15278	4	59.335	14.1638	54.4275
4	41232752	41234346	BARC-058411-15278	4	59.335	12.7972	50.8375
4	41477379	41477928	BARC-058411-15278	4	59.335	9.03674	39.4315
4	41998041	41998614	BARC-058411-15278	4	59.335	14.7482	55.8815
4	42071861	42072897	BARC-058411-15278	4	59.335	15.6131	57.9485
4	42073463	42075384	BARC-058411-15278	4	59.335	16.3169	59.559
4	42762279	42763317	NA	NA	NA	NA	NA
4	45202737	45203661	NA	NA	NA	NA	NA
4	45992129	45992526	NA	NA	NA	NA	NA
4	49137366	49140190	NA	NA	NA	NA	NA
5	787162	787517	BARC-053201-11762	15	76.596	12.3758	49.6746
5	1174157	1175373	BARC-051847-11270	8	101.93	10.2932	43.51
5	2848924	2849321	BARC-058785-15434	5	27.639	6.7447	31.2176
5	3679360	3679733	BARC-058785-15434	5	27.639	3.08448	15.7296
5	4247099	4248378	BARC-058785-15434	5	27.639	12.0835	48.8517
5	4369052	4369369	BARC-058785-15434	5	27.639	10.8233	45.1474
5	4946626	4948232	BARC-058785-15434	5	27.639	12.2133	49.2188
5	5000651	5001094	BARC-058785-15434	5	27.639	9.19438	39.9589
5	5480330	5480731	BARC-058785-15434	5	27.639	11.1439	46.1144
5	6841401	6842124	BARC-058785-15434	5	27.639	16.9551	60.966
5	8663865	8664404	BARC-017935-02459	5	17.406	8.47057	37.4986
5	8989614	8989930	BARC-017935-02459	5	17.406	8.88844	38.931
5	11485450	11485684	BARC-058785-15434	5	27.639	11.4817	47.1149
5	11704924	11705749	NA	NA	NA	NA	NA
5	14865583	14866826	BARC-058785-15434	5	27.639	15.0015	56.4972
5	16192702	16193594	BARC-058785-15434	5	27.639	19.4428	65.9985
5	16417523	16420407	BARC-058785-15434	5	27.639	19.9309	66.9069
5	17294639	17295091	BARC-058785-15434	5	27.639	17.5245	62.1798
5	21814930	21815115	BARC-048025-10453	5	32.398	4.82479	23.4862
5	23650353	23651814	BARC-058785-15434	5	27.639	20.4776	67.8956
5	24340806	24341013	BARC-058785-15434	5	27.639	14.725	55.8245
5	24380752	24381272	BARC-058785-15434	5	27.639	7.7386	34.908
5	25355048	25356342	BARC-058785-15434	5	27.639	19.2107	65.5578
5	25420305	25421233	BARC-058785-15434	5	27.639	16.4479	59.8518
5	25535786	25536221	BARC-058785-15434	5	27.639	17.3262	61.7615
5	25585761	25586070	BARC-058785-15434	5	27.639	5.48624	26.2433
5	25973061	25973516	BARC-058785-15434	5	27.639	16.7023	60.4147
5	26488950	26492033	BARC-058785-15434	5	27.639	18.9542	65.0641
5	26721872	26722623	BARC-058785-15434	5	27.639	18.2367	63.6452
5	26788422	26789116	BARC-048025-10453	5	32.398	13.7576	53.3886
5	27104717	27105737	BARC-058785-15434	5	27.639	16.2954	59.5108
5	28249187	28250290	BARC-048025-10453	5	32.398	15.8232	58.436
5	28322810	28323807	BARC-048025-10453	5	32.398	7.87885	35.4125
5	29858904	29865258	BARC-064245-18594	5	33.81	20.3154	67.6054
5	30121325	30122053	BARC-064245-18594	5	33.81	10.3246	43.6082
5	30567344	30568929	BARC-064245-18594	5	33.81	20.2375	67.4651
5	31585217	31585454	BARC-064245-18594	5	33.81	16.3212	59.5688
5	31596697	31597301	BARC-042331-08243	5	42.038	9.35718	40.4988
5	31922201	31926002	BARC-052343-11430	5	37.896	18.236	63.6438
5	38122355	38125093	BARC-059073-15592	5	77.959	6.28661	29.447
5	39268146	39268454	BARC-059073-15592	5	77.959	9.23807	40.1043
5	39598011	39598393	BARC-059073-15592	5	77.959	12.4422	49.8595
6	4708713	4709026	BARC-062461-17811	6	33.278	5.99616	28.3008
6	11844394	11844617	BARC-013837-01254	6	86.271	3.67892	18.4636
6	12296965	12297358	NA	NA	NA	NA	NA
6	14853255	14853656	BARC-013837-01254	6	86.271	17.9773	63.1182
6	14906655	14906983	BARC-013837-01254	6	86.271	15.7357	58.2337
6	15036698	15037648	BARC-013837-01254	6	86.271	14.4004	55.0217
6	15568781	15571183	BARC-013837-01254	6	86.271	16.203	59.3026
6	15582296	15582912	BARC-013837-01254	6	86.271	13.6152	53.0189
6	16923138	16923998	BARC-063661-18416	6	98.146	17.8734	62.905
6	17350309	17353855	BARC-063661-18416	6	98.146	14.0041	54.0219
6	17489120	17489807	BARC-064115-18558	6	100.941	13.4839	52.6753
6	17997694	17998467	BARC-064115-18558	6	100.941	14.6241	55.5765
6	18021699	18022852	BARC-064115-18558	6	100.941	10.9656	45.5787
6	18201252	18202424	BARC-064115-18558	6	100.941	14.5388	55.3657
6	18514679	18516007	BARC-064115-18558	6	100.941	15.6152	57.9534
6	18516019	18516787	BARC-064115-18558	6	100.941	15.7958	58.3727
6	18516789	18516900	BARC-064115-18558	6	100.941	13.6022	52.985
6	18516993	18519342	BARC-064115-18558	6	100.941	16.1595	59.2043
6	18519422	18519780	BARC-064115-18558	6	100.941	15.3208	57.2611
6	18722503	18723721	BARC-066175-19800	6	100.913	12.4057	49.758
6	21800447	21802090	BARC-064115-18558	6	100.941	16.5639	60.1096
6	22471362	22472679	BARC-064115-18558	6	100.941	18.4521	64.077
6	26447895	26448512	BARC-063661-18416	6	98.146	17.9933	63.1509
6	38717159	38717522	BARC-064115-18558	6	100.941	15.9284	58.6778
6	39114568	39116448	BARC-064115-18558	6	100.941	16.4632	59.8859
6	39330887	39331314	BARC-064115-18558	6	100.941	15.514	57.7166
6	39819752	39819928	BARC-064115-18558	6	100.941	12.2266	50.0991
6	40100998	40102250	BARC-064115-18558	6	100.941	17.297	61.6994
6	41077460	41078535	BARC-064115-18558	6	100.941	15.9637	58.7586
6	41333849	41334425	BARC-064115-18558	6	100.941	6.5075	30.3064
6	42474220	42476276	BARC-064115-18558	6	100.941	12.2281	49.2605
6	43579573	43579790	BARC-064115-18558	6	100.941	9.85784	42.1289
6	43579808	43580123	BARC-064115-18558	6	100.941	12.7577	50.7298
6	43915890	43916617	BARC-064115-18558	6	100.941	14.426	55.0856
6	44689963	44691009	BARC-010457-00640	6	108.504	11.6837	47.7044
6	44691070	44693039	BARC-055939-13876	6	110.153	9.03878	39.4383
6	45168644	45169763	BARC-010457-00640	6	108.504	11.9843	48.5695
6	45172566	45173239	BARC-010457-00640	6	108.504	17.3189	61.7459
6	45504907	45505678	BARC-010457-00640	6	108.504	15.0971	56.7272
6	46310495	46310944	BARC-010777-00746	6	113.054	14.4012	55.0237
6	46310950	46311170	BARC-010777-00746	6	113.054	8.88086	38.9053
6	46633040	46634065	BARC-010777-00746	6	113.054	6.04581	28.4981
6	46952508	46953641	BARC-010777-00746	6	113.054	22.1443	70.7314
6	46961580	46962459	BARC-010777-00746	6	113.054	18.0857	63.3393
6	48981249	48981684	BARC-010777-00746	6	113.054	6.6932	31.0208
6	49579924	49580109	BARC-038861-07350	6	132.414	9.95806	42.4498
6	49655465	49655680	BARC-041427-07981	6	130.272	10.188	43.1795
7	4233118	4233405	NA	NA	NA	NA	NA
7	14435097	14435259	NA	NA	NA	NA	NA
7	16260892	16261838	BARC-028385-05858	7	87.684	5.21655	25.1314
7	16319678	16320219	NA	NA	NA	NA	NA
7	18485339	18485479	NA	NA	NA	NA	NA
7	18864100	18865669	BARC-028385-05858	7	87.684	13.5147	52.7561
7	20861220	20863200	BARC-028385-05858	7	87.684	11.9734	48.5384
7	21007954	21009476	BARC-028385-05858	7	87.684	13.3139	52.227
7	21230865	21231881	BARC-028385-05858	7	87.684	16.1762	59.2421
7	21231882	21232627	BARC-028385-05858	7	87.684	12.9839	51.3442
7	24924630	24925431	BARC-028385-05858	7	87.684	13.4397	52.5591
7	25545644	25545968	BARC-028385-05858	7	87.684	5.90787	27.9487
7	27030253	27032501	BARC-028385-05858	7	87.684	15.1196	56.7811
7	27453870	27454482	BARC-028385-05858	7	87.684	13.322	52.2483
7	28375034	28375738	BARC-028385-05858	7	87.684	15.5764	57.8629
7	32043820	32044370	BARC-028385-05858	7	87.684	11.4685	47.0764
7	32970626	32973119	BARC-028385-05858	7	87.684	13.6912	53.2165
7	35051494	35052573	BARC-028385-05858	7	87.684	15.1418	56.8343
7	36171874	36173303	BARC-028385-05858	7	87.684	20.13	67.2704
7	36197573	36198007	BARC-028385-05858	7	87.684	16.2456	59.3988
7	36247627	36248805	BARC-028385-05858	7	87.684	19.1356	65.414
7	36691010	36692023	BARC-028385-05858	7	87.684	16.448	59.8521
7	37402736	37403337	BARC-028385-05858	7	87.684	16.6283	60.2517
7	37839357	37839818	BARC-028385-05858	7	87.684	12.4899	49.9921
7	37980748	37982769	BARC-028385-05858	7	87.684	12.3264	49.5364
7	38297827	38300053	BARC-028385-05858	7	87.684	10.6902	44.7408
7	38697055	38698078	BARC-028385-05858	7	87.684	6.32791	29.6085
7	39498716	39499802	NA	NA	NA	NA	NA
7	39853093	39853576	NA	NA	NA	NA	NA
7	40065549	40067454	NA	NA	NA	NA	NA
7	40672078	40672622	NA	NA	NA	NA	NA
8	49254	50492	BARC-021937-04237	8	9.566	10.2939	43.5124
8	7565133	7565378	BARC-016685-03321	8	46.416	6.38169	29.8182
8	10558435	10558578	NA	NA	NA	NA	NA
8	11506600	11506942	BARC-027614-06619	8	56.878	11.8883	48.2946
8	12810922	12812980	BARC-044217-08646	8	61.884	7.3614	33.5314
8	13061263	13062013	BARC-044217-08646	8	61.884	5.55062	26.5063
8	13496886	13497287	BARC-044217-08646	8	61.884	8.86184	38.8408
8	13745303	13746110	BARC-044217-08646	8	61.884	6.19964	29.1058
8	13922802	13923077	NA	NA	NA	NA	NA
8	13923894	13924193	BARC-038489-10129	8	73.546	8.46372	37.4748
8	15227873	15230255	BARC-038489-10129	8	73.546	8.01618	35.9028
8	15849473	15849969	BARC-039899-07603	8	76.426	10.2437	43.3547
8	16483340	16483621	BARC-042491-08277	8	79.136	12.8038	50.8554
8	16963964	16964877	BARC-022387-04319	8	81.247	14.2018	54.5234
8	17432443	17433132	BARC-022387-04319	8	81.247	10.4226	43.9141
8	18260454	18260858	NA	NA	NA	NA	NA
8	22298448	22299148	BARC-057653-14889	8	99.803	4.62491	22.6329
8	23347528	23348484	BARC-051847-11270	8	101.93	8.66759	38.1781
8	23636598	23638607	BARC-057653-14889	8	99.803	8.03753	35.9787
8	23880211	23881587	BARC-057653-14889	8	99.803	7.3357	33.4365
8	25153177	25154067	BARC-051847-11270	8	101.93	8.85358	38.8128
8	28987380	28991118	BARC-051847-11270	8	101.93	9.13708	39.7677
8	29656505	29658594	BARC-051847-11270	8	101.93	8.67595	38.2068
8	29662957	29663967	BARC-051847-11270	8	101.93	8.32981	37.0085
8	29768845	29769749	BARC-051847-11270	8	101.93	8.83332	38.744
8	29769787	29770799	BARC-051847-11270	8	101.93	7.79696	35.1184
8	30080583	30080979	BARC-051847-11270	8	101.93	8.5172	37.6601
8	30170841	30172119	BARC-051847-11270	8	101.93	9.98479	42.5351
8	30283849	30286110	BARC-051847-11270	8	101.93	8.82668	38.7214
8	31789557	31790479	BARC-051847-11270	8	101.93	9.1929	39.954
8	32982722	32983606	BARC-051847-11270	8	101.93	8.86954	38.8669
8	33748487	33752567	BARC-051847-11270	8	101.93	9.1509	39.8139
8	34325611	34325910	BARC-051847-11270	8	101.93	8.96006	39.1732
8	34329555	34331312	BARC-051847-11270	8	101.93	9.68282	41.5642
8	35144416	35145760	BARC-051847-11270	8	101.93	8.89671	38.959
8	35277620	35279176	BARC-051847-11270	8	101.93	8.49197	37.5728
8	35430728	35432660	BARC-057653-14889	8	99.803	7.93599	35.617
8	35433240	35433718	BARC-057653-14889	8	99.803	7.13377	32.6866
8	35437722	35438898	BARC-051847-11270	8	101.93	9.3474	40.4665
8	35439607	35443019	BARC-051847-11270	8	101.93	9.44163	40.7769
8	35543340	35546156	BARC-051847-11270	8	101.93	9.64637	41.4459
8	35811033	35812655	BARC-051847-11270	8	101.93	10.0867	42.8591
8	35825468	35826876	BARC-051847-11270	8	101.93	9.75263	41.7901
8	35829667	35830627	BARC-051847-11270	8	101.93	10.7349	44.8775
8	36226267	36228388	BARC-051847-11270	8	101.93	9.7936	41.9223
8	36276417	36278289	BARC-051847-11270	8	101.93	9.21858	40.0394
8	39091737	39092671	BARC-051847-11270	8	101.93	9.37534	40.5587
8	40240457	40243801	BARC-051847-11270	8	101.93	6.59257	30.6346
8	41147838	41148923	BARC-061019-17012	8	113.979	6.89581	31.7919
8	41149066	41150214	BARC-061019-17012	8	113.979	8.37984	37.1832
8	42407742	42408678	BARC-061019-17012	8	113.979	8.78827	38.5907
8	42701572	42702957	BARC-061019-17012	8	113.979	15.4085	57.4686
8	42888447	42889517	BARC-061019-17012	8	113.979	13.8147	53.5362
8	43418141	43419064	BARC-061019-17012	8	113.979	11.6465	47.5963
8	46943665	46944976	BARC-053255-11775	8	142.958	15.4863	57.6517
9	929722	930442	BARC-055141-13084	9	6.863	14.8721	56.1837
9	3357958	3358405	BARC-014659-01609	9	34.032	4.83322	23.5219
9	3525840	3526251	NA	NA	NA	NA	NA
9	3793326	3795837	NA	NA	NA	NA	NA
9	4980461	4981056	BARC-014659-01609	9	34.032	8.38482	37.2005
9	5772204	5773396	NA	NA	NA	NA	NA
9	6035468	6040118	BARC-026035-05236	9	35.018	14.0333	54.0962
9	6040231	6042428	BARC-026035-05236	9	35.018	14.4579	55.1651
9	6043118	6044406	BARC-026035-05236	9	35.018	11.7772	47.975
9	18573770	18573982	NA	NA	NA	NA	NA
9	18573988	18575263	NA	NA	NA	NA	NA
9	27499660	27499833	NA	NA	NA	NA	NA
9	30155363	30155585	NA	NA	NA	NA	NA
9	31753321	31753600	BARC-047428-12928	19	29.32	12.5884	50.2645
9	31753821	31754160	BARC-047428-12928	19	29.32	5.61936	26.7861
9	32030760	32031019	NA	NA	NA	NA	NA
9	32084498	32085766	NA	NA	NA	NA	NA
9	34126962	34127278	NA	NA	NA	NA	NA
9	36513131	36514162	BARC-054349-12493	6	5.4	5.68632	27.0576
9	37276469	37276930	NA	NA	NA	NA	NA
9	39042807	39043296	BARC-038909-07393	9	69.282	6.34716	29.6836
9	39633352	39634292	BARC-038909-07393	9	69.282	7.35737	33.5165
9	40030601	40031159	NA	NA	NA	NA	NA
9	40353306	40353503	BARC-038909-07393	9	69.282	13.1379	51.7582
9	43658964	43659994	BARC-053539-11889	9	84.243	13.2017	51.9287
9	44111103	44112296	BARC-053539-11889	9	84.243	10.2057	43.2353
10	1584430	1584962	NA	NA	NA	NA	NA
10	1759932	1760546	NA	NA	NA	NA	NA
10	4665540	4665992	BARC-017045-02182	10	43.739	4.67664	22.8546
10	6631653	6635912	BARC-017045-02182	10	43.739	12.3247	49.5317
10	6854389	6855212	BARC-017045-02182	10	43.739	13.4102	52.4816
10	6855601	6858445	BARC-017045-02182	10	43.739	12.8909	51.0923
10	7050447	7052123	BARC-017045-02182	10	43.739	8.7223	38.3655
10	7399031	7402483	BARC-051153-11022	10	46.376	16.981	61.0221
10	7404033	7405793	BARC-051153-11022	10	46.376	12.86	51.0086
10	8585590	8586419	BARC-060901-16948	10	51.569	15.8259	58.4421
10	9018706	9019262	BARC-060901-16948	10	51.569	10.375	43.766
10	9194291	9196056	BARC-060901-16948	10	51.569	18.2189	63.6093
10	9551752	9552558	BARC-060901-16948	10	51.569	15.4868	57.653
10	9639121	9639938	BARC-060901-16948	10	51.569	7.99731	35.8357
10	9648355	9649125	BARC-064941-19017	10	53.136	17.6639	62.4713
10	9657602	9659437	BARC-060901-16948	10	51.569	16.3999	59.7447
10	9932713	9933900	BARC-060901-16948	10	51.569	15.3217	57.2631
10	10193643	10195921	BARC-060901-16948	10	51.569	17.0999	61.2783
10	10224637	10225590	BARC-064941-19017	10	53.136	16.3394	59.6094
10	10308213	10308713	BARC-060901-16948	10	51.569	17.8568	62.8708
10	10870903	10871482	BARC-064941-19017	10	53.136	15.7344	58.2306
10	11329744	11330365	BARC-064941-19017	10	53.136	14.9703	56.4218
10	11671689	11672427	BARC-060901-16948	10	51.569	18.3676	63.9083
10	11725760	11727907	BARC-064941-19017	10	53.136	14.0972	54.2587
10	12472988	12475641	BARC-060901-16948	10	51.569	16.7247	60.4637
10	12497441	12498852	BARC-060901-16948	10	51.569	13.4741	52.6496
10	13122162	13123135	BARC-060901-16948	10	51.569	16.9056	60.8586
10	15180343	15181822	BARC-064941-19017	10	53.136	15.8564	58.5125
10	15501493	15502359	BARC-060901-16948	10	51.569	15.0372	56.5833
10	15794081	15795148	BARC-060901-16948	10	51.569	15.1635	56.8865
10	16484270	16485287	BARC-060901-16948	10	51.569	15.6334	57.996
10	16995797	16998368	BARC-060901-16948	10	51.569	18.8435	64.8487
10	18262205	18263358	BARC-060901-16948	10	51.569	14.738	55.8564
10	18616654	18617811	BARC-060901-16948	10	51.569	15.6465	58.0265
10	19502359	19504516	BARC-060901-16948	10	51.569	17.4129	61.945
10	19844322	19844594	BARC-064941-19017	10	53.136	13.8649	53.6653
10	21062636	21062975	BARC-060901-16948	10	51.569	16.8671	60.7748
10	21416956	21417832	BARC-060901-16948	10	51.569	17.011	61.0868
10	21481016	21482590	BARC-060901-16948	10	51.569	14.7264	55.8279
10	25247217	25247938	BARC-060901-16948	10	51.569	11.1567	46.1526
10	26938308	26940683	BARC-060901-16948	10	51.569	18.3048	63.7824
10	27932259	27933186	BARC-064941-19017	10	53.136	15.8573	58.5145
10	28873505	28873900	BARC-060901-16948	10	51.569	6.68658	30.9955
10	28918761	28919316	BARC-064941-19017	10	53.136	11.3753	46.8019
10	29269624	29270497	BARC-064941-19017	10	53.136	17.2905	61.6856
10	29370160	29371046	BARC-064941-19017	10	53.136	16.0504	58.9567
10	29722052	29723472	BARC-064941-19017	10	53.136	16.27	59.4535
10	30469664	30470685	BARC-064941-19017	10	53.136	16.5187	60.0093
10	30540485	30541259	BARC-064941-19017	10	53.136	12.0365	48.7182
10	31211143	31212044	BARC-064941-19017	10	53.136	16.9015	60.8498
10	32332815	32334066	BARC-064941-19017	10	53.136	14.9585	56.3931
10	33485430	33487693	BARC-064941-19017	10	53.136	18.451	64.0748
10	34055182	34055967	BARC-064941-19017	10	53.136	12.0802	48.8422
10	34315932	34316473	BARC-064941-19017	10	53.136	16.228	59.359
10	34914706	34918290	BARC-064941-19017	10	53.136	15.8611	58.5233
10	35656769	35659064	BARC-064941-19017	10	53.136	17.5935	62.3244
10	35744133	35746202	BARC-064941-19017	10	53.136	17.6713	62.4867
10	35746756	35749306	BARC-064941-19017	10	53.136	17.633	62.4069
10	36195608	36198513	BARC-064941-19017	10	53.136	18.7248	64.6165
10	36198577	36200494	BARC-064941-19017	10	53.136	17.6751	62.4947
10	36887626	36888081	BARC-064941-19017	10	53.136	19.6417	66.3717
10	36893358	36895763	BARC-064941-19017	10	53.136	20.6318	68.1691
10	36927754	36929020	BARC-064941-19017	10	53.136	18.6579	64.4851
10	37026374	37027271	NA	NA	NA	NA	NA
10	37290509	37291040	BARC-064941-19017	10	53.136	15.3145	57.2461
10	37486491	37487321	BARC-064941-19017	10	53.136	14.7504	55.8867
10	38678426	38679677	BARC-029531-06209	10	58.489	8.23465	36.6751
10	42015045	42015282	BARC-008021-00209	10	92.393	6.2087	29.1414
10	42164034	42164469	NA	NA	NA	NA	NA
10	45909592	45910683	BARC-065783-19748	10	117.856	11.311	46.6116
10	46166899	46167445	BARC-065783-19748	10	117.856	11.737	47.8587
10	50575831	50576184	NA	NA	NA	NA	NA
11	737316	737738	NA	NA	NA	NA	NA
11	3129195	3129488	BARC-030863-06956	11	32.136	7.69669	34.7564
11	5015728	5016401	BARC-054021-12241	11	31.508	17.7096	62.5663
11	5016634	5017590	BARC-030863-06956	11	32.136	20.1381	67.2852
11	10927137	10929205	BARC-016279-02316	11	61.609	10.4612	44.0342
11	11117202	11118211	BARC-016279-02316	11	61.609	11.197	46.273
11	11790642	11791939	BARC-016279-02316	11	61.609	8.14263	36.3509
11	11895817	11896462	BARC-016279-02316	11	61.609	7.61969	34.4771
11	15204172	15205651	BARC-016279-02316	11	61.609	10.2846	43.4833
11	15251273	15251715	BARC-016279-02316	11	61.609	6.78883	31.3858
11	15880431	15881374	BARC-016279-02316	11	61.609	7.7547	34.9661
11	16314338	16315732	NA	NA	NA	NA	NA
11	16342419	16343800	BARC-027720-06642	11	92.403	4.20884	20.8261
11	16439724	16440015	NA	NA	NA	NA	NA
11	16490678	16492258	NA	NA	NA	NA	NA
11	16569953	16570599	NA	NA	NA	NA	NA
11	16839151	16839733	BARC-016279-02316	11	61.609	3.45623	17.45
11	17994823	17995259	NA	NA	NA	NA	NA
11	18118638	18119747	BARC-016279-02316	11	61.609	5.67966	27.0306
11	18147672	18150874	BARC-016279-02316	11	61.609	5.7629	27.3668
11	18194740	18196317	BARC-016279-02316	11	61.609	7.15121	32.7516
11	18354732	18355749	BARC-016279-02316	11	61.609	5.36164	25.7316
11	18494101	18494430	NA	NA	NA	NA	NA
11	18494967	18495438	NA	NA	NA	NA	NA
11	18892129	18893123	NA	NA	NA	NA	NA
11	24331538	24332038	BARC-016279-02316	11	61.609	4.5182	22.1735
11	24340385	24342968	BARC-016279-02316	11	61.609	5.0225	24.3209
11	24970451	24973086	BARC-016279-02316	11	61.609	5.24417	25.246
11	27742494	27743054	BARC-016279-02316	11	61.609	5.01238	24.2784
11	28841032	28843155	BARC-016279-02316	11	61.609	4.27947	21.1357
11	30073479	30074458	BARC-016279-02316	11	61.609	4.14526	20.5463
11	30246441	30249143	BARC-016279-02316	11	61.609	5.65615	26.9354
11	31131722	31131999	BARC-016279-02316	11	61.609	3.64535	18.3116
11	31132120	31132737	BARC-016279-02316	11	61.609	4.44057	21.8375
11	31680923	31681115	NA	NA	NA	NA	NA
11	32780944	32781723	NA	NA	NA	NA	NA
11	33150442	33152748	NA	NA	NA	NA	NA
11	33544279	33544842	NA	NA	NA	NA	NA
11	33643013	33644942	NA	NA	NA	NA	NA
11	34176917	34177619	NA	NA	NA	NA	NA
11	34273775	34275066	NA	NA	NA	NA	NA
11	34275863	34277807	NA	NA	NA	NA	NA
11	34597138	34597310	NA	NA	NA	NA	NA
11	34678050	34679827	NA	NA	NA	NA	NA
11	36152231	36152344	NA	NA	NA	NA	NA
11	37349982	37350952	BARC-027720-06642	11	92.403	12.3137	49.5009
11	37402980	37403372	BARC-012259-01773	18	9.95701	10.4268	43.9271
11	37407216	37407792	BARC-012259-01773	18	9.95701	12.0905	48.8716
11	37431459	37431619	NA	NA	NA	NA	NA
11	37497965	37498356	BARC-035379-07181	11	94.765	7.47495	33.9488
11	37896992	37898025	BARC-037219-06745	11	109.489	13.1345	51.7489
11	37916406	37919001	BARC-037219-06745	11	109.489	11.7266	47.8288
11	38791423	38792243	BARC-900336-00920	11	113.624	17.0697	61.2135
12	5408845	5409695	BARC-021659-04168	12	42.707	7.00088	32.1884
12	5962962	5963409	BARC-010777-00746	6	113.054	5.5347	26.4414
12	6445592	6446192	BARC-021659-04168	12	42.707	14.8396	56.1046
12	6875333	6875586	NA	NA	NA	NA	NA
12	7267194	7267374	BARC-032147-07327	12	52.74	11.8005	48.0422
12	7377826	7378302	BARC-011573-00291	12	51.54	16.0997	59.0686
12	7379073	7380545	BARC-011573-00291	12	51.54	17.0388	61.1469
12	7447858	7449772	BARC-011573-00291	12	51.54	16.3048	59.5318
12	7684272	7686313	BARC-032147-07327	12	52.74	16.3314	59.5915
12	7810235	7810772	BARC-053829-12063	20	30.134	14.298	54.7654
12	7876285	7876750	BARC-032147-07327	12	52.74	16.1595	59.2042
12	8501816	8502330	BARC-032147-07327	12	52.74	16.8022	60.6334
12	9860839	9862414	BARC-025943-05179	12	55.638	14.0833	54.2234
12	10170475	10171564	BARC-062675-18002	12	55.833	13.9103	53.7819
12	10171579	10172012	BARC-025943-05179	12	55.638	7.89864	35.4834
12	10512860	10513662	BARC-025943-05179	12	55.638	13.6883	53.2091
12	10623800	10625003	BARC-062675-18002	12	55.833	13.7892	53.4704
12	10666946	10668737	BARC-062675-18002	12	55.833	13.8971	53.748
12	10668830	10670538	BARC-062675-18002	12	55.833	14.6104	55.5429
12	10670728	10671460	BARC-025943-05179	12	55.638	14.6554	55.6535
12	10693992	10694315	BARC-062675-18002	12	55.833	13.5843	52.9383
12	10723304	10724438	BARC-025943-05179	12	55.638	14.1671	54.4356
12	10727537	10728532	BARC-025943-05179	12	55.638	14.5848	55.4796
12	10741139	10742144	BARC-025943-05179	12	55.638	12.8553	50.9958
12	10952207	10953075	BARC-062675-18002	12	55.833	14.9707	56.4227
12	11044897	11045826	BARC-062675-18002	12	55.833	15.1318	56.8105
12	11513561	11514405	BARC-025943-05179	12	55.638	14.6788	55.7111
12	11514592	11517810	BARC-025943-05179	12	55.638	17.2612	61.6234
12	12248790	12250347	BARC-062675-18002	12	55.833	13.2999	52.1898
12	12265088	12265420	BARC-025943-05179	12	55.638	10.9533	45.5416
12	12315389	12318960	BARC-025943-05179	12	55.638	13.1189	51.7073
12	12319035	12319894	BARC-050237-09522	12	58.343	11.631	47.5512
12	12379667	12381237	BARC-025943-05179	12	55.638	13.7957	53.487
12	12656741	12657368	BARC-025943-05179	12	55.638	12.3046	49.4754
12	12883336	12885182	BARC-025943-05179	12	55.638	12.9011	51.12
12	13311671	13312494	BARC-025943-05179	12	55.638	11.6023	47.4676
12	13435686	13436511	BARC-025943-05179	12	55.638	9.44944	40.8026
12	13886066	13886961	BARC-050237-09522	12	58.343	9.04746	39.4674
12	14023993	14024588	BARC-050237-09522	12	58.343	9.50181	40.9743
12	14901034	14901676	BARC-007732-00002	12	61.154	8.94408	39.1193
12	15407390	15408152	BARC-050237-09522	12	58.343	9.03517	39.4262
12	16403878	16404792	BARC-050237-09522	12	58.343	9.62859	41.3881
12	18437377	18438238	BARC-007732-00002	12	61.154	10.6867	44.7299
12	18821377	18822150	BARC-007732-00002	12	61.154	10.4813	44.0964
12	19420710	19422864	BARC-007732-00002	12	61.154	10.89	45.35
12	25561295	25561972	BARC-007732-00002	12	61.154	11.5443	47.2984
12	25854309	25855444	NA	NA	NA	NA	NA
12	25870613	25872927	BARC-007732-00002	12	61.154	10.3993	43.8417
12	27108499	27109827	BARC-007732-00002	12	61.154	10.9416	45.5063
12	27111596	27113097	BARC-007732-00002	12	61.154	10.6248	44.5399
12	27186373	27187397	BARC-007732-00002	12	61.154	9.53566	41.0851
12	27187408	27189437	BARC-007732-00002	12	61.154	9.34842	40.4699
12	27202912	27203450	BARC-007732-00002	12	61.154	7.52516	34.4671
12	27203751	27204461	BARC-007732-00002	12	61.154	9.71716	41.6754
12	27232206	27232935	BARC-007732-00002	12	61.154	7.44603	33.8427
12	27232937	27233648	BARC-007732-00002	12	61.154	10.0546	42.7572
12	27233660	27234845	BARC-007732-00002	12	61.154	9.57436	41.2115
12	27582163	27584001	BARC-007732-00002	12	61.154	8.98044	39.242
12	27735212	27735626	BARC-007732-00002	12	61.154	9.56967	41.1962
12	28403944	28404737	NA	NA	NA	NA	NA
12	28861919	28862080	BARC-007732-00002	12	61.154	10.0692	42.8037
12	28862095	28862472	BARC-007732-00002	12	61.154	10.0217	42.6527
12	30385870	30388143	BARC-007732-00002	12	61.154	10.7446	44.9073
12	30403389	30403743	BARC-007732-00002	12	61.154	10.7983	45.0711
12	30404652	30405366	BARC-007732-00002	12	61.154	7.60209	34.4131
12	30517164	30518133	BARC-007732-00002	12	61.154	8.30081	36.9071
12	31469464	31469781	BARC-007732-00002	12	61.154	9.73289	41.7263
12	32048594	32049266	BARC-007732-00002	12	61.154	6.48857	30.2332
12	32431213	32431869	BARC-007732-00002	12	61.154	6.50094	30.2811
12	32606629	32608164	BARC-007732-00002	12	61.154	8.4392	37.3897
12	32755885	32757001	BARC-018895-03034	12	70.79	9.60764	41.3199
12	34663576	34664171	BARC-050003-09283	12	78.391	7.24633	33.1056
12	37275247	37275575	BARC-032647-09003	12	87.357	6.3107	29.5413
12	37275689	37276351	BARC-032647-09003	12	87.357	6.45945	30.1204
12	37288906	37289868	BARC-032647-09003	12	87.357	6.1994	29.1048
12	37291547	37292225	BARC-032647-09003	12	87.357	6.66449	30.9108
12	37337382	37338092	BARC-032647-09003	12	87.357	6.59953	30.6614
12	37338163	37338244	NA	NA	NA	NA	NA
12	40096146	40096442	NA	NA	NA	NA	NA
13	3137643	3138051	BARC-051955-11307	13	15.035	14.512	55.2993
13	3138648	3139783	BARC-051955-11307	13	15.035	12.1327	48.991
13	3540404	3541447	BARC-051955-11307	13	15.035	14.8553	56.1429
13	4595653	4595992	BARC-059869-16174	13	20.084	10.4326	43.9454
13	4760570	4760660	BARC-051955-11307	13	15.035	11.9234	48.3953
13	4760749	4761615	BARC-051955-11307	13	15.035	13.7784	53.4423
13	4990791	4991602	NA	NA	NA	NA	NA
13	5542169	5543843	NA	NA	NA	NA	NA
13	6608846	6609561	NA	NA	NA	NA	NA
13	6717132	6717461	NA	NA	NA	NA	NA
13	8408640	8408898	NA	NA	NA	NA	NA
13	8408904	8409464	NA	NA	NA	NA	NA
13	8409478	8409583	NA	NA	NA	NA	NA
13	9084059	9084569	NA	NA	NA	NA	NA
13	13817941	13818143	NA	NA	NA	NA	NA
13	24239079	24239643	BARC-029581-06217	13	40.041	8.86647	38.8565
13	24418167	24419244	BARC-065495-19507	13	51.896	4.00118	19.9086
13	24419422	24420032	BARC-050235-09520	13	44.849	9.58189	41.236
13	25761806	25762815	BARC-050235-09520	13	44.849	12.6669	50.4809
13	25762816	25763578	BARC-050235-09520	13	44.849	13.4128	52.4883
13	26233704	26235198	BARC-057867-14973	20	29.164	17.0312	61.1303
13	28495939	28497035	BARC-021603-04153	18	104.215	8.65721	38.1425
13	32815386	32816320	BARC-065495-19507	13	51.896	5.39026	25.8495
13	36551760	36552017	BARC-028583-05961	13	75.921	18.8702	64.9008
13	40819205	40822066	BARC-013325-00484	13	100.61	18.1682	63.5068
13	42763628	42763864	BARC-013325-00484	13	100.61	6.44055	30.0471
13	42789109	42789670	NA	NA	NA	NA	NA
13	43011918	43012001	BARC-029803-06418	20	50.849	7.1358	32.6941
13	43988592	43989467	NA	NA	NA	NA	NA
13	44304219	44304949	NA	NA	NA	NA	NA
14	7896	10452	BARC-014285-01304	14	4.936	22.6186	71.4916
14	938720	939130	NA	NA	NA	NA	NA
14	1395977	1397001	BARC-022025-04259	14	11.344	12.1139	48.9378
14	1441487	1443094	BARC-028553-05949	14	10.429	17.5869	62.3106
14	3732564	3733459	BARC-056287-14214	15	76.864	3.73099	18.6989
14	3750461	3750995	BARC-049217-10824	14	15.619	17.7754	62.7028
14	5150340	5150519	NA	NA	NA	NA	NA
14	5781740	5782678	BARC-015539-02002	14	27.381	11.7383	47.8626
14	6720954	6722582	BARC-055975-13947	14	35.521	13.949	53.8811
14	10031706	10033875	BARC-065009-19043	14	56.602	13.1757	51.8593
14	10277189	10281795	BARC-057817-14938	14	55.785	10.8292	45.1652
14	10281992	10282302	BARC-057817-14938	14	55.785	11.4327	46.971
14	10356586	10357197	BARC-057817-14938	14	55.785	12.678	50.5114
14	10357716	10359623	BARC-065009-19043	14	56.602	11.853	48.1934
14	10571044	10571586	NA	NA	NA	NA	NA
14	10840663	10841795	BARC-065009-19043	14	56.602	13.2729	52.1181
14	10900507	10902079	BARC-065009-19043	14	56.602	13.9934	53.9945
14	10954816	10957027	BARC-065009-19043	14	56.602	12.8822	51.0687
14	10997408	10998187	BARC-065009-19043	14	56.602	9.10746	39.6686
14	10998689	10999167	BARC-065009-19043	14	56.602	8.95504	39.1563
14	11320813	11322281	BARC-065009-19043	14	56.602	12.8868	51.0814
14	11681430	11682392	BARC-065009-19043	14	56.602	11.4384	46.9879
14	11682808	11685032	BARC-065009-19043	14	56.602	13.6683	53.1573
14	11776828	11779812	BARC-057817-14938	14	55.785	13.6193	53.0297
14	12253252	12254037	BARC-057817-14938	14	55.785	11.6733	47.6743
14	12427427	12428362	BARC-065009-19043	14	56.602	12.9757	51.3219
14	12481174	12483778	BARC-057817-14938	14	55.785	11.9362	48.4318
14	12722676	12723625	BARC-057817-14938	14	55.785	11.3426	46.7054
14	13437101	13438077	BARC-057817-14938	14	55.785	10.7357	44.88
14	13576561	13577290	BARC-065009-19043	14	56.602	8.96961	39.2054
14	13696977	13697684	BARC-057817-14938	14	55.785	10.2984	43.5264
14	13716702	13719055	BARC-065009-19043	14	56.602	10.1486	43.0549
14	13895814	13897482	BARC-065009-19043	14	56.602	11.3007	46.5813
14	14906571	14906892	BARC-057817-14938	14	55.785	9.39245	40.6151
14	15813159	15814747	BARC-065009-19043	14	56.602	9.18147	39.9159
14	15815401	15817078	BARC-057817-14938	14	55.785	10.8083	45.1017
14	15919077	15919888	BARC-065009-19043	14	56.602	9.89429	42.2458
14	15969618	15971261	BARC-057817-14938	14	55.785	9.458	40.8307
14	17206870	17207788	BARC-065009-19043	14	56.602	10.2447	43.358
14	18017779	18018092	BARC-065009-19043	14	56.602	9.36203	40.5148
14	18416304	18419324	BARC-065009-19043	14	56.602	9.17367	39.8898
14	18419422	18421609	BARC-057817-14938	14	55.785	10.4225	43.914
14	18810187	18813476	BARC-057817-14938	14	55.785	9.89147	42.2368
14	19249767	19249948	BARC-065009-19043	14	56.602	7.82161	35.2071
14	19483166	19484234	BARC-065009-19043	14	56.602	10.8604	45.2602
14	19549506	19549949	BARC-057817-14938	14	55.785	8.58739	37.9024
14	23322312	23322900	BARC-065009-19043	14	56.602	10.0625	42.7825
14	24571930	24572454	BARC-057817-14938	14	55.785	8.10957	36.2341
14	24573755	24575503	BARC-065009-19043	14	56.602	6.84997	31.6182
14	26283745	26284283	BARC-057817-14938	14	55.785	10.7851	45.031
14	26290478	26291214	BARC-065009-19043	14	56.602	10.584	44.4143
14	28107764	28111016	BARC-057817-14938	14	55.785	6.16549	28.9713
14	28821661	28822512	BARC-065009-19043	14	56.602	9.81928	42.005
14	35799502	35800183	BARC-065009-19043	14	56.602	5.27256	25.3636
14	42846727	42847695	BARC-057817-14938	14	55.785	7.64223	34.559
14	43139146	43140850	BARC-065009-19043	14	56.602	6.64243	30.8262
14	43141703	43142731	BARC-057817-14938	14	55.785	7.85781	35.3371
14	43368410	43368965	NA	NA	NA	NA	NA
14	44157776	44160394	NA	NA	NA	NA	NA
14	44986658	44988245	NA	NA	NA	NA	NA
14	46256063	46256261	BARC-017933-02457	14	75.973	9.35885	40.5043
14	46333128	46334038	NA	NA	NA	NA	NA
14	46563931	46564435	BARC-017933-02457	14	75.973	7.32495	33.3968
14	46569154	46570095	BARC-017933-02457	14	75.973	6.93853	31.9534
14	47020180	47021502	NA	NA	NA	NA	NA
14	48344422	48345635	BARC-064301-18614	14	86.941	10.6591	45.0431
14	48550669	48551265	BARC-012703-00380	14	98.88	13.3973	52.4476
15	661	998	NA	NA	NA	NA	NA
15	6537	7341	NA	NA	NA	NA	NA
15	69550	72090	BARC-025493-06513	15	9.972	10.4514	44.0039
15	1462414	1463806	BARC-025493-06513	15	9.972	18.428	64.0291
15	1965701	1966332	BARC-025493-06513	15	9.972	17.9565	63.0755
15	6935926	6936503	BARC-038977-07417	15	33.181	13.707	53.6891
15	9780859	9781097	NA	NA	NA	NA	NA
15	12049865	12050823	BARC-018461-02916	15	61.363	10.7996	45.0753
15	12116545	12118878	BARC-018461-02916	15	61.363	14.5564	55.4095
15	12208535	12208915	BARC-018461-02916	15	61.363	8.68616	38.2418
15	12529914	12531337	BARC-018461-02916	15	61.363	14.474	55.205
15	12642802	12643196	BARC-018461-02916	15	61.363	11.9296	48.413
15	12694699	12695446	BARC-018461-02916	15	61.363	14.2199	54.5692
15	12696461	12697292	BARC-018461-02916	15	61.363	14.143	54.3747
15	12847882	12848683	BARC-018461-02916	15	61.363	14.0452	54.1266
15	13310352	13311001	BARC-058671-17458	15	69.692	14.4632	55.1783
15	14424091	14424294	BARC-054023-12243	15	69.793	16.3665	60.5643
15	14927524	14928642	BARC-054023-12243	15	69.793	20.131	67.7151
15	14936201	14936337	BARC-054023-12243	15	69.793	12.7203	52.8111
15	15692633	15693140	BARC-054023-12243	15	69.793	15.7214	58.2005
15	16078839	16079808	BARC-019069-03297	15	71.73	15.0656	56.6517
15	16081831	16082256	BARC-023525-05447	15	71.204	8.71838	38.3521
15	16623667	16624395	BARC-054023-12243	15	69.793	17.6169	62.3732
15	16767326	16768237	BARC-016029-02040	15	70.598	8.76981	38.5277
15	16825632	16826219	BARC-057755-14919	15	74.805	10.8793	45.3174
15	17087286	17088082	BARC-056287-14214	15	76.864	7.19851	32.9279
15	17116356	17119098	BARC-054023-12243	15	69.793	17.0124	61.0899
15	17160354	17162329	BARC-054023-12243	15	69.793	16.8456	60.7282
15	17293982	17295936	BARC-057755-14919	15	74.805	18.4656	64.104
15	17522566	17523678	BARC-057755-14919	15	74.805	18.8458	64.8534
15	17586154	17587649	BARC-057755-14919	15	74.805	17.7067	62.5604
15	17806615	17808126	BARC-057755-14919	15	74.805	19.5837	66.2632
15	17868224	17869986	BARC-057755-14919	15	74.805	19.1735	65.4865
15	17961373	17961972	BARC-057755-14919	15	74.805	17.4751	62.076
15	18270796	18272323	BARC-057755-14919	15	74.805	18.9853	65.1244
15	18283668	18284278	BARC-057755-14919	15	74.805	17.7626	62.6762
15	18353467	18354783	BARC-057755-14919	15	74.805	17.5612	62.2569
15	18373049	18373748	BARC-057755-14919	15	74.805	21.3888	69.4784
15	18453706	18453949	NA	NA	NA	NA	NA
15	18491438	18492695	BARC-057755-14919	15	74.805	12.5036	50.0301
15	18530464	18531592	BARC-057755-14919	15	74.805	17.1942	61.4804
15	18554376	18556349	BARC-057755-14919	15	74.805	16.7298	60.475
15	18565585	18566287	BARC-057755-14919	15	74.805	15.511	57.7097
15	18665679	18667272	BARC-057755-14919	15	74.805	16.8388	60.7132
15	18784665	18785990	BARC-057755-14919	15	74.805	17.9999	63.1645
15	19320864	19323530	BARC-057755-14919	15	74.805	16.7537	60.5274
15	19468828	19469848	BARC-057755-14919	15	74.805	17.6322	62.4051
15	19618725	19619414	BARC-057755-14919	15	74.805	16.9614	60.9796
15	19619513	19619779	BARC-057755-14919	15	74.805	17.4568	62.0375
15	19620008	19620343	BARC-057755-14919	15	74.805	14.4787	55.2167
15	19620363	19621259	BARC-057755-14919	15	74.805	16.8595	60.7583
15	19621268	19622907	BARC-057755-14919	15	74.805	15.1736	56.9105
15	19624391	19624707	BARC-054023-12243	15	69.793	14.182	54.4735
15	19688754	19689793	BARC-057755-14919	15	74.805	15.3927	57.4312
15	19702683	19703585	BARC-057755-14919	15	74.805	16.7934	60.6143
15	19706125	19706450	BARC-057755-14919	15	74.805	17.351	61.8141
15	20045894	20049247	BARC-057755-14919	15	74.805	17.0585	61.1892
15	20416214	20417648	BARC-053201-11762	15	76.596	15.32	57.2591
15	20438238	20439220	BARC-057755-14919	15	74.805	19.1163	65.3769
15	20682273	20683204	BARC-053201-11762	15	76.596	20.2145	67.4235
15	20944508	20945498	BARC-053201-11762	15	76.596	20.189	67.3774
15	21779155	21779800	BARC-053201-11762	15	76.596	19.9595	66.9593
15	21939292	21940528	BARC-053201-11762	15	76.596	19.9866	67.009
15	22228074	22228850	BARC-053201-11762	15	76.596	17.3434	61.798
15	22264161	22266563	BARC-053201-11762	15	76.596	19.7647	66.6003
15	22444121	22445206	BARC-053201-11762	15	76.596	18.0427	63.2517
15	22449722	22451530	BARC-053201-11762	15	76.596	18.5724	64.3161
15	22599099	22600801	BARC-053201-11762	15	76.596	18.3451	63.8632
15	22606911	22607904	BARC-053201-11762	15	76.596	19.1676	65.4752
15	22608726	22609111	BARC-030059-06795	15	76.37	19.7939	66.6545
15	23226466	23227537	BARC-040185-07678	15	77.659	18.5207	64.2136
15	23284885	23286345	BARC-040185-07678	15	77.659	16.7501	60.5194
15	23389463	23391313	BARC-040185-07678	15	77.659	18.7654	64.6962
15	23564987	23566354	BARC-040185-07678	15	77.659	18.3981	63.9693
15	23566925	23568197	BARC-040185-07678	15	77.659	17.6912	62.5282
15	23725553	23726306	BARC-053201-11762	15	76.596	20.6785	68.2515
15	24380472	24380784	BARC-040185-07678	15	77.659	14.8183	56.0527
15	24443288	24445867	BARC-040185-07678	15	77.659	17.5358	62.2035
15	26244758	26247389	BARC-040185-07678	15	77.659	16.376	59.6914
15	27589452	27591628	BARC-053201-11762	15	76.596	19.4857	66.0792
15	27592745	27593093	BARC-040185-07678	15	77.659	15.549	57.7987
15	29650068	29650402	BARC-053201-11762	15	76.596	21.1679	69.102
15	30211644	30213221	BARC-040185-07678	15	77.659	17.2626	61.6263
15	30442368	30443699	BARC-040185-07678	15	77.659	18.0891	63.3462
15	30742632	30744301	BARC-040185-07678	15	77.659	16.7595	60.54
15	31013815	31016084	BARC-040185-07678	15	77.659	18.4254	64.0239
15	32283279	32283955	BARC-053201-11762	15	76.596	19.681	66.4449
15	32331042	32331991	BARC-040185-07678	15	77.659	16.2029	59.3023
15	32332140	32332805	BARC-062831-18095	15	80.793	10.4245	43.9202
15	32725838	32727579	BARC-040185-07678	15	77.659	15.3983	57.4445
15	32771381	32772498	BARC-040185-07678	15	77.659	15.9903	58.8195
15	33338544	33341179	BARC-040185-07678	15	77.659	16.77	60.5631
15	33929149	33930783	BARC-040185-07678	15	77.659	17.8266	62.8086
15	34988347	34989673	BARC-053201-11762	15	76.596	18.3844	63.9419
15	35873602	35875232	BARC-030059-06795	15	76.37	18.9924	65.138
15	36450669	36450889	BARC-053201-11762	15	76.596	12.3797	49.6854
15	36683793	36687587	BARC-040185-07678	15	77.659	16.3025	59.5268
15	38896695	38898196	BARC-040185-07678	15	77.659	14.9828	56.4521
15	38968156	38969857	BARC-040185-07678	15	77.659	15.9755	58.7856
15	39365597	39367486	BARC-040185-07678	15	77.659	11.2636	46.4712
15	39685683	39688159	BARC-040185-07678	15	77.659	17.3865	61.8892
15	39767578	39768039	BARC-053201-11762	15	76.596	12.54	50.131
15	39892428	39892989	BARC-040185-07678	15	77.659	14.3387	54.8675
15	40460308	40462168	BARC-040185-07678	15	77.659	14.9078	56.2704
15	40778475	40778789	BARC-030059-06795	15	76.37	12.2976	49.4558
15	40868587	40869331	BARC-040185-07678	15	77.659	14.5166	55.3109
15	40948299	40949213	BARC-040185-07678	15	77.659	16.4058	59.758
15	41235059	41236255	BARC-040185-07678	15	77.659	15.4864	57.6519
15	41422372	41423902	BARC-040185-07678	15	77.659	14.4469	55.1376
15	41832378	41834268	BARC-059221-15678	15	77.406	17.6723	62.4887
15	42218945	42221381	BARC-040185-07678	15	77.659	15.9207	58.6602
15	42222160	42222768	BARC-040185-07678	15	77.659	16.009	58.8623
15	42261908	42262541	BARC-040185-07678	15	77.659	15.7118	58.1782
15	42365984	42367485	BARC-040185-07678	15	77.659	16.3002	59.5214
15	42615842	42617315	BARC-040185-07678	15	77.659	12.5319	50.1086
15	42628400	42629526	BARC-062831-18095	15	80.793	13.9382	53.8533
15	42971149	42972917	BARC-040185-07678	15	77.659	13.2884	52.1592
15	44280818	44281801	BARC-062831-18095	15	80.793	14.3358	54.8602
15	44783356	44784670	BARC-062831-18095	15	80.793	10.0017	42.5889
15	44794421	44795357	BARC-062831-18095	15	80.793	13.5028	52.7251
15	44818721	44818925	BARC-062831-18095	15	80.793	9.31175	40.3486
15	44818939	44819008	BARC-062831-18095	15	80.793	5.62515	26.8096
15	47267249	47267783	BARC-062831-18095	15	80.793	13.337	52.2882
15	49313547	49313935	NA	NA	NA	NA	NA
15	50539347	50540434	BARC-019069-03297	15	71.73	4.97322	24.1137
15	50632376	50632945	BARC-062831-18095	15	80.793	5.02053	24.3126
15	50872243	50872742	NA	NA	NA	NA	NA
16	2669958	2670525	BARC-054099-12340	16	25.768	6.07656	28.6199
16	3827996	3828502	NA	NA	NA	NA	NA
16	3864479	3865896	BARC-054099-12340	16	25.768	7.8038	35.143
16	5927802	5930443	BARC-028159-05778	16	41.631	9.2373	40.1017
16	5977241	5978024	BARC-048299-10543	16	43.042	7.84114	35.2773
16	6656066	6656510	BARC-028159-05778	16	41.631	11.1824	46.2295
16	6659863	6660085	BARC-028159-05778	16	41.631	12.3174	49.5112
16	7404571	7405508	BARC-048299-10543	16	43.042	19.5568	66.2128
16	7406018	7406653	BARC-048299-10543	16	43.042	17.1244	61.3308
16	7406723	7408876	BARC-048299-10543	16	43.042	19.6315	66.3526
16	7563822	7564556	BARC-048299-10543	16	43.042	20.5462	68.0177
16	7564558	7565382	BARC-048299-10543	16	43.042	18.234	63.6397
16	7693205	7693721	BARC-048299-10543	16	43.042	17.953	63.0685
16	10910131	10910329	NA	NA	NA	NA	NA
16	17809002	17809883	BARC-055949-13908	16	46.675	17.4304	61.9818
16	17809927	17810333	BARC-055949-13908	16	46.675	16.3922	59.7277
16	22588802	22588960	BARC-055949-13908	16	46.675	8.55148	38.1375
16	22588995	22589240	BARC-055949-13908	16	46.675	14.0701	54.1899
16	23306267	23306623	BARC-055949-13908	16	46.675	9.8868	42.2218
16	26150698	26151023	BARC-055949-13908	16	46.675	16.5378	60.0516
16	27001107	27003127	BARC-056411-14301	16	48.983	26.0104	76.382
16	27061229	27061870	BARC-055949-13908	16	46.675	23.0851	72.2199
16	27497431	27498392	NA	NA	NA	NA	NA
16	27613640	27614189	BARC-039865-07595	16	49.858	7.661	34.6271
16	27884302	27885148	BARC-055949-13908	16	46.675	26.567	77.1003
16	28116075	28118121	BARC-039865-07595	16	49.858	20.7546	68.3852
16	28244077	28245338	BARC-056411-14301	16	48.983	21.3875	69.4761
16	28286493	28290527	BARC-056411-14301	16	48.983	28.0176	78.871
16	28529798	28530315	BARC-039865-07595	16	49.858	16.8578	60.7547
16	32760976	32761827	BARC-064455-18689	16	71.559	17.4475	62.018
16	32875903	32876995	BARC-064455-18689	16	71.559	19.1084	65.3617
16	36229909	36230301	BARC-019215-03395	16	86.807	9.47509	40.8868
16	36463708	36463927	BARC-019215-03395	16	86.807	6.13905	28.867
16	36742245	36742493	BARC-019215-03395	16	86.807	14.5019	55.7111
16	36742595	36743668	BARC-019215-03395	16	86.807	13.1628	51.8248
16	37182121	37182503	BARC-030817-06946	16	88.929	12.0245	48.6841
17	5138468	5139159	BARC-048043-10480	17	22.996	15.8686	58.5406
17	8343379	8343655	BARC-012687-00367	17	42.449	9.15161	39.8163
17	10397973	10398596	BARC-012687-00367	17	42.449	7.04148	32.341
17	10693553	10694249	BARC-012687-00367	17	42.449	6.02827	28.4285
17	16389870	16390205	NA	NA	NA	NA	NA
17	22746006	22746127	NA	NA	NA	NA	NA
17	23974615	23974840	NA	NA	NA	NA	NA
17	23980608	23981617	BARC-057565-14836	18	55.603	5.84162	27.6834
17	31402907	31403570	NA	NA	NA	NA	NA
17	31652884	31653158	NA	NA	NA	NA	NA
17	32837051	32837512	NA	NA	NA	NA	NA
17	36254841	36257492	BARC-011591-00299	17	99.549	3.62343	18.2122
17	37700225	37700731	NA	NA	NA	NA	NA
17	40446416	40447144	BARC-011591-00299	17	99.549	12.3181	49.5132
18	366809	368401	BARC-014403-01354	18	1.533	9.23759	40.1027
18	592323	593081	BARC-014403-01354	18	1.533	10.2731	43.4469
18	1635565	1635858	NA	NA	NA	NA	NA
18	1639672	1640027	BARC-048801-10723	18	10.063	10.502	44.1606
18	1650356	1651110	BARC-012259-01773	18	9.95701	12.7268	50.6452
18	1653770	1654501	BARC-012259-01773	18	9.95701	11.3676	46.7791
18	1655650	1657249	BARC-047665-10370	18	15.967	9.27403	40.2236
18	2653399	2654185	BARC-047665-10370	18	15.967	10.3658	43.7372
18	2908252	2909110	BARC-047665-10370	18	15.967	9.79176	41.9163
18	2978227	2981117	BARC-047665-10370	18	15.967	11.1154	46.0293
18	3682060	3684786	BARC-047665-10370	18	15.967	8.51137	37.6399
18	3823993	3824489	BARC-053201-11762	15	76.596	16.0903	59.0473
18	3981670	3982465	BARC-047665-10370	18	15.967	7.31603	33.3638
18	4040003	4042542	BARC-047665-10370	18	15.967	8.33281	37.019
18	4573468	4574232	BARC-042201-08212	18	38.962	5.22083	25.1491
18	5519834	5522189	BARC-042201-08212	18	38.962	8.77414	38.5425
18	5789190	5789693	BARC-042201-08212	18	38.962	8.03273	35.9617
18	6016823	6017198	BARC-042201-08212	18	38.962	11.492	47.1453
18	6119756	6120309	BARC-042201-08212	18	38.962	10.8475	45.2209
18	6168168	6168613	BARC-042201-08212	18	38.962	11.4685	47.0761
18	6365420	6365928	BARC-042201-08212	18	38.962	8.06231	36.0666
18	6528206	6529850	BARC-042201-08212	18	38.962	12.4912	49.9958
18	6530360	6531468	BARC-063581-18909	18	41.17	12.4962	50.0095
18	6531745	6534379	BARC-042201-08212	18	38.962	13.8049	53.5108
18	6731150	6731823	BARC-057845-14952	18	103.109	6.11982	28.7911
18	7102740	7103552	BARC-063581-18909	18	41.17	19.6204	66.3319
18	7104265	7104645	BARC-063581-18909	18	41.17	15.3333	57.2907
18	7364523	7364941	BARC-063581-18909	18	41.17	8.94012	39.1059
18	7714193	7714501	NA	NA	NA	NA	NA
18	7775342	7776153	BARC-051587-11167	18	44.053	17.4228	61.966
18	8055468	8056093	BARC-054023-12243	15	69.793	4.15527	20.8133
18	8056868	8058617	BARC-054023-12243	15	69.793	11.1259	47.2949
18	8356817	8357784	BARC-051587-11167	18	44.053	15.8221	58.4334
18	8400308	8401005	BARC-051587-11167	18	44.053	16.6399	60.2774
18	8511268	8512183	BARC-051587-11167	18	44.053	16.7237	60.4616
18	8947515	8948615	BARC-051587-11167	18	44.053	16.1533	59.1903
18	8963832	8965257	BARC-063581-18909	18	41.17	13.7337	53.3269
18	9154995	9155919	BARC-051587-11167	18	44.053	13.5017	52.7221
18	9359611	9360705	BARC-051587-11167	18	44.053	17.3855	61.887
18	9364346	9366213	BARC-051587-11167	18	44.053	17.8128	62.78
18	9385090	9388404	BARC-051587-11167	18	44.053	16.2681	59.4493
18	9389819	9390974	BARC-051587-11167	18	44.053	15.8711	58.5462
18	9431124	9431973	BARC-051587-11167	18	44.053	16.5136	59.998
18	9433540	9434267	BARC-051587-11167	18	44.053	14.9234	56.3081
18	9438958	9441166	BARC-051587-11167	18	44.053	17.0347	61.138
18	9482646	9483521	BARC-051587-11167	18	44.053	10.6494	44.6155
18	9727347	9728112	BARC-051587-11167	18	44.053	10.664	44.6605
18	10034717	10035538	BARC-051587-11167	18	44.053	11.6445	47.5905
18	10065624	10067130	BARC-051587-11167	18	44.053	15.5312	57.757
18	10244595	10246236	BARC-051587-11167	18	44.053	12.9513	51.2561
18	10246243	10246657	BARC-051587-11167	18	44.053	10.7093	44.7993
18	10248025	10250070	NA	NA	NA	NA	NA
18	10251117	10251843	BARC-051587-11167	18	44.053	4.00992	19.9474
18	10325424	10326126	BARC-051587-11167	18	44.053	12.5642	50.1978
18	10537062	10539534	BARC-051587-11167	18	44.053	15.2368	57.0613
18	10562964	10564797	BARC-051587-11167	18	44.053	14.9674	56.4146
18	10593183	10594117	BARC-051587-11167	18	44.053	8.69222	38.2625
18	11289239	11290219	BARC-051587-11167	18	44.053	13.3886	52.4245
18	11439935	11442433	BARC-051587-11167	18	44.053	12.8295	50.9255
18	11540488	11541621	BARC-051587-11167	18	44.053	13.3994	52.4531
18	11780631	11783529	BARC-051587-11167	18	44.053	13.5077	52.7378
18	12537736	12540946	BARC-051099-10991	18	47.933	15.7183	58.1932
18	12547263	12548387	BARC-051099-10991	18	47.933	14.1316	54.346
18	12626579	12627534	BARC-051099-10991	18	47.933	15.3021	57.2167
18	12652544	12653426	BARC-064283-18606	18	48.209	12.3633	49.6395
18	12724660	12725444	BARC-051099-10991	18	47.933	14.4611	55.173
18	13246873	13247453	BARC-064283-18606	18	48.209	8.16668	36.4358
18	14267374	14267703	BARC-064283-18606	18	48.209	15.7494	58.2655
18	14446946	14448459	BARC-064283-18606	18	48.209	15.1933	56.9576
18	14769284	14769931	BARC-064283-18606	18	48.209	14.6946	55.7499
18	14878184	14879129	BARC-064283-18606	18	48.209	15.0644	56.6488
18	15216872	15218918	BARC-064283-18606	18	48.209	15.8833	58.5743
18	15351397	15352409	BARC-064283-18606	18	48.209	16.1052	59.0811
18	15458784	15459400	BARC-064283-18606	18	48.209	17.0308	61.1297
18	15549786	15550442	BARC-064283-18606	18	48.209	5.76896	27.3913
18	15869039	15871835	BARC-064283-18606	18	48.209	17.5937	62.3249
18	16607698	16607940	BARC-064283-18606	18	48.209	15.3807	57.4029
18	16647242	16647602	BARC-064283-18606	18	48.209	14.9492	56.3708
18	17334977	17335498	BARC-064283-18606	18	48.209	14.4857	55.234
18	18702962	18703646	BARC-064283-18606	18	48.209	13.099	51.654
18	19262058	19262486	BARC-063705-18440	18	54.445	5.09147	24.61
18	19464669	19465201	BARC-063705-18440	18	54.445	12.0091	48.6401
18	19578615	19582475	BARC-063705-18440	18	54.445	14.0945	54.2518
18	20337578	20338687	BARC-063705-18440	18	54.445	12.9303	51.1991
18	20474178	20474925	BARC-063705-18440	18	54.445	15.5481	57.7966
18	20793398	20794369	BARC-063705-18440	18	54.445	14.5563	55.409
18	20825932	20827327	BARC-063705-18440	18	54.445	9.03675	39.4315
18	20878565	20880070	BARC-063705-18440	18	54.445	17.783	62.7185
18	20880601	20881504	BARC-063705-18440	18	54.445	13.9546	53.8953
18	20884832	20885536	BARC-063705-18440	18	54.445	16.9666	60.9909
18	21414948	21416396	BARC-063705-18440	18	54.445	17.1047	61.2887
18	22252931	22254652	BARC-057565-14836	18	55.603	14.7283	55.8328
18	22383456	22384413	BARC-057565-14836	18	55.603	12.2351	49.2802
18	22775484	22778337	BARC-057565-14836	18	55.603	17.5815	62.2993
18	22778368	22780480	BARC-057565-14836	18	55.603	17.3678	61.8497
18	23123416	23125480	BARC-057565-14836	18	55.603	16.3394	59.6094
18	23125719	23127374	BARC-057565-14836	18	55.603	15.3157	57.249
18	23176685	23177396	BARC-057565-14836	18	55.603	15.5978	57.9129
18	23587013	23588797	BARC-057565-14836	18	55.603	15.3627	57.3603
18	23676906	23677195	BARC-057565-14836	18	55.603	13.0613	51.5526
18	23964382	23965872	BARC-057565-14836	18	55.603	16.1112	59.0949
18	24496029	24498194	BARC-057565-14836	18	55.603	16.0631	58.9855
18	24503188	24503685	BARC-057565-14836	18	55.603	13.5212	52.7734
18	25310960	25312561	BARC-057827-14943	4	52.082	12.524	50.0867
18	25786660	25787475	BARC-057823-14942	3	28.457	8.74283	38.4356
18	25833437	25836592	BARC-057827-14943	4	52.082	14.0329	54.0952
18	26261405	26262639	BARC-057827-14943	4	52.082	14.7793	55.9573
18	26704384	26705491	BARC-057827-14943	4	52.082	15.5311	57.7569
18	26735625	26737148	BARC-057827-14943	4	52.082	17.2538	61.6076
18	26976667	26979892	BARC-057827-14943	4	52.082	15.7629	58.2966
18	27093713	27094636	BARC-057827-14943	4	52.082	16.406	59.7583
18	27098786	27099832	BARC-057827-14943	4	52.082	14.0653	54.1776
18	27101882	27104098	BARC-057827-14943	4	52.082	16.5625	60.1064
18	27115147	27115997	BARC-057827-14943	4	52.082	15.5194	57.7293
18	27116029	27116968	BARC-042719-08395	4	50.769	13.2452	52.0444
18	27185202	27185700	BARC-042719-08395	4	50.769	15.3943	57.4351
18	27860395	27865137	BARC-057565-14836	18	55.603	15.2962	57.2027
18	28443234	28444998	BARC-057565-14836	18	55.603	16.6391	60.2756
18	29995123	29995768	BARC-057565-14836	18	55.603	11.7556	47.9127
18	30063727	30066502	BARC-057565-14836	18	55.603	15.9306	58.683
18	30660345	30662016	BARC-057565-14836	18	55.603	15.0805	56.6873
18	30687027	30688859	BARC-057565-14836	18	55.603	14.9969	56.486
18	32123258	32123818	BARC-057565-14836	18	55.603	14.7457	55.8752
18	32131082	32132577	BARC-057565-14836	18	55.603	17.0542	61.18
18	32653561	32655560	BARC-057565-14836	18	55.603	14.0416	54.1174
18	33188933	33190348	BARC-057565-14836	18	55.603	14.6566	55.6566
18	33236333	33236492	BARC-057565-14836	18	55.603	13.5091	52.7415
18	35303390	35304280	BARC-057565-14836	18	55.603	14.3378	54.8654
18	37380506	37382410	BARC-057565-14836	18	55.603	15.326	57.2734
18	37781511	37782646	BARC-057565-14836	18	55.603	17.6147	62.3686
18	37792274	37794791	BARC-057565-14836	18	55.603	15.3874	57.4186
18	37932734	37934858	BARC-057565-14836	18	55.603	15.935	58.6929
18	38139031	38140366	BARC-057565-14836	18	55.603	15.2535	57.101
18	38148055	38151341	BARC-057565-14836	18	55.603	18.2344	63.6405
18	39246271	39248058	BARC-057565-14836	18	55.603	14.1274	54.3354
18	40289738	40290985	BARC-057565-14836	18	55.603	10.6027	44.4718
18	41401205	41403062	BARC-057565-14836	18	55.603	14.7231	55.8198
18	42059528	42061031	BARC-057565-14836	18	55.603	14.1443	54.3782
18	42061628	42063867	BARC-057565-14836	18	55.603	13.9238	53.8166
18	42211382	42213747	BARC-057565-14836	18	55.603	14.1283	54.3375
18	42260605	42261034	BARC-057565-14836	18	55.603	13.405	52.4678
18	42520486	42521581	BARC-057565-14836	18	55.603	14.8267	56.0731
18	42521647	42524130	BARC-057565-14836	18	55.603	12.3334	49.556
18	43072536	43074173	BARC-057565-14836	18	55.603	14.6956	55.7524
18	44867333	44867933	BARC-057565-14836	18	55.603	11.7489	47.8932
18	44869172	44869694	BARC-057565-14836	18	55.603	7.52412	34.1288
18	44896829	44897586	BARC-057565-14836	18	55.603	11.03	45.7729
18	45225145	45226533	BARC-057565-14836	18	55.603	13.0626	51.5561
18	45415365	45415805	BARC-061457-17222	18	60.526	11.8393	48.154
18	45797111	45798592	BARC-061457-17222	18	60.526	13.0629	51.5569
18	46054682	46055195	BARC-061457-17222	18	60.526	11.678	47.6878
18	46281096	46282157	BARC-060125-16403	18	61.074	12.1209	48.9578
18	46298532	46300145	BARC-061457-17222	18	60.526	12.7617	50.7407
18	46309586	46310545	BARC-060125-16403	18	61.074	13.173	51.8519
18	47471949	47473914	BARC-060125-16403	18	61.074	17.3508	61.8136
18	47668087	47669349	BARC-060125-16403	18	61.074	13.8616	53.657
18	47954949	47955801	BARC-061457-17222	18	60.526	13.0191	51.439
18	47957371	47958342	BARC-061457-17222	18	60.526	10.1805	43.1557
18	48744585	48744899	BARC-060125-16403	18	61.074	14.5214	55.3226
18	48744915	48745255	BARC-061457-17222	18	60.526	9.53193	41.0729
18	49080428	49081322	BARC-060125-16403	18	61.074	14.024	54.0724
18	49350261	49351348	BARC-061457-17222	18	60.526	12.9409	51.228
18	49571442	49573540	BARC-060125-16403	18	61.074	14.6146	55.5532
18	49658587	49658714	BARC-061457-17222	18	60.526	10.4221	44.7077
18	49863817	49865074	BARC-061457-17222	18	60.526	13.4427	52.5672
18	50470948	50471688	BARC-060125-16403	18	61.074	14.514	55.3045
18	50494634	50496198	BARC-060125-16403	18	61.074	16.4675	59.8955
18	50496744	50500592	BARC-061457-17222	18	60.526	15.0386	56.5865
18	50534236	50535436	BARC-061457-17222	18	60.526	13.5174	52.7632
18	50629245	50629956	BARC-060125-16403	18	61.074	12.4806	49.9662
18	50866015	50866853	BARC-061457-17222	18	60.526	12.6114	50.328
18	50867077	50868405	BARC-060125-16403	18	61.074	13.8496	53.626
18	51002238	51003255	BARC-061457-17222	18	60.526	13.3093	52.2147
18	51129907	51131517	BARC-061457-17222	18	60.526	15.2191	57.0192
18	51460660	51461147	BARC-060125-16403	18	61.074	10.5489	44.306
18	51791762	51793470	BARC-061457-17222	18	60.526	15.4202	57.4961
18	51859808	51863189	BARC-061457-17222	18	60.526	12.688	50.5387
18	51863569	51865119	BARC-061457-17222	18	60.526	13.7346	53.329
18	52042281	52043598	BARC-061457-17222	18	60.526	8.71163	38.329
18	52325039	52325682	BARC-060125-16403	18	61.074	8.84481	38.783
18	52372948	52374361	BARC-060125-16403	18	61.074	12.4929	50.0005
18	52450014	52450549	BARC-060125-16403	18	61.074	9.42927	40.7363
18	53840329	53840506	BARC-060125-16403	18	61.074	12.5167	50.0664
18	53840778	53844041	BARC-060125-16403	18	61.074	12.2604	49.3513
18	53844078	53846294	BARC-060125-16403	18	61.074	12.0964	48.8882
18	53847166	53848635	BARC-060125-16403	18	61.074	10.7922	45.0527
18	54079730	54080557	BARC-061457-17222	18	60.526	10.216	43.2675
18	54087661	54089468	BARC-061457-17222	18	60.526	11.1336	46.0837
18	54092609	54093766	BARC-061457-17222	18	60.526	9.99067	42.5539
18	54229428	54230456	BARC-061457-17222	18	60.526	10.5593	44.3381
18	54304441	54304846	BARC-061457-17222	18	60.526	12.0566	48.7754
18	54352460	54352888	BARC-061457-17222	18	60.526	10.6273	44.5475
18	54432149	54433677	BARC-061457-17222	18	60.526	8.43523	37.3759
18	54451689	54452160	BARC-048761-10703	18	72.842	8.64748	38.1091
18	54628494	54628988	BARC-048761-10703	18	72.842	6.45279	30.0945
18	54830219	54830789	BARC-048761-10703	18	72.842	9.24551	40.129
18	55088347	55088681	BARC-048761-10703	18	72.842	5.90261	27.9277
18	55446125	55446260	BARC-048761-10703	18	72.842	8.90417	39.7241
18	55642510	55643628	BARC-048761-10703	18	72.842	9.80872	41.971
18	56268932	56269705	BARC-048761-10703	18	72.842	10.0656	42.7921
18	56345354	56345942	BARC-048761-10703	18	72.842	10.9082	45.4051
18	56690444	56693297	BARC-019001-03050	18	76.246	11.1636	46.1733
18	56822184	56823348	BARC-048761-10703	18	72.842	6.89828	31.8012
18	58892441	58892820	BARC-010255-00571	18	93.867	5.74874	27.3098
18	58892980	58893442	BARC-010255-00571	18	93.867	8.73454	38.4073
18	59484369	59485561	BARC-010255-00571	18	93.867	12.1224	48.9621
18	59996228	59997264	BARC-057845-14952	18	103.109	11.9146	48.3702
18	60524636	60525012	BARC-057845-14952	18	103.109	18.6375	64.4447
18	60689542	60689987	BARC-021603-04153	18	104.215	15.3666	57.3694
19	1419941	1420261	BARC-059443-15806	19	30.414	6.43235	30.0152
19	1758595	1758874	NA	NA	NA	NA	NA
19	1953971	1955900	NA	NA	NA	NA	NA
19	3003515	3004511	BARC-047428-12928	19	29.32	8.83157	38.738
19	3625968	3626933	BARC-047428-12928	19	29.32	9.16099	39.8476
19	3652694	3654286	BARC-047428-12928	19	29.32	10.8294	45.166
19	3762677	3763748	BARC-011793-00875	19	29.317	11.4416	46.9971
19	3866077	3866692	BARC-047428-12928	19	29.32	10.3145	43.5769
19	4118396	4119125	BARC-047428-12928	19	29.32	6.69427	31.0249
19	4198033	4198912	BARC-011793-00875	19	29.317	11.5765	47.3923
19	4818212	4820669	BARC-011793-00875	19	29.317	15.2242	57.0313
19	5157014	5159241	BARC-011793-00875	19	29.317	15.1592	56.8762
19	5178665	5180315	BARC-047428-12928	19	29.32	14.6449	55.6279
19	5242572	5243047	BARC-047428-12928	19	29.32	12.9294	51.1967
19	5959371	5961154	BARC-047428-12928	19	29.32	17.2475	61.5941
19	6182288	6183005	BARC-047428-12928	19	29.32	15.6771	58.0977
19	6842741	6843967	BARC-047428-12928	19	29.32	14.8737	56.1876
19	7114222	7115818	BARC-047428-12928	19	29.32	17.3995	61.9166
19	7244333	7245930	BARC-047428-12928	19	29.32	15.4593	57.5881
19	7501632	7502806	BARC-047428-12928	19	29.32	17.2433	61.5852
19	7905280	7905892	BARC-047428-12928	19	29.32	19.1816	65.502
19	8044886	8046496	BARC-047428-12928	19	29.32	16.7758	60.5756
19	8368198	8371424	BARC-047428-12928	19	29.32	17.6848	62.5148
19	8409831	8410865	BARC-047428-12928	19	29.32	8.42442	37.3383
19	8607729	8608948	BARC-047428-12928	19	29.32	16.8841	60.8118
19	8810708	8811224	BARC-047428-12928	19	29.32	14.2051	54.5318
19	8882290	8884841	BARC-047428-12928	19	29.32	16.71	60.4315
19	9122227	9124005	BARC-047428-12928	19	29.32	14.5456	55.3828
19	9406318	9406875	BARC-047428-12928	19	29.32	15.1513	56.8573
19	9431349	9433202	BARC-047428-12928	19	29.32	16.6881	60.3835
19	10495556	10496391	BARC-047428-12928	19	29.32	16.7557	60.5318
19	10497157	10499043	BARC-011793-00875	19	29.317	17.105	61.2894
19	10511844	10513121	BARC-047428-12928	19	29.32	14.7381	55.8568
19	10514674	10515289	BARC-047428-12928	19	29.32	14.7695	55.9336
19	10516507	10517401	BARC-047428-12928	19	29.32	16.8706	60.7825
19	10584223	10585538	BARC-047428-12928	19	29.32	16.2615	59.4346
19	10586125	10587119	BARC-047428-12928	19	29.32	16.578	60.1407
19	11050905	11053215	BARC-047428-12928	19	29.32	19.7139	66.5061
19	11112207	11113136	BARC-047428-12928	19	29.32	18.7189	64.605
19	11677773	11680815	BARC-011793-00875	19	29.317	19.3583	65.8387
19	11945776	11946196	BARC-047428-12928	19	29.32	10.1175	42.9566
19	11981671	11984027	BARC-047428-12928	19	29.32	17.5977	62.3331
19	12051236	12053500	BARC-011793-00875	19	29.317	18.3297	63.8324
19	12456930	12459035	BARC-011793-00875	19	29.317	16.3735	59.6858
19	12854045	12856659	BARC-047428-12928	19	29.32	16.8655	60.7715
19	13509504	13512646	BARC-047428-12928	19	29.32	16.9125	60.8736
19	13542461	13543323	BARC-047428-12928	19	29.32	14.529	55.3417
19	13728089	13729960	BARC-047428-12928	19	29.32	13.3816	52.4061
19	14212480	14215511	BARC-011793-00875	19	29.317	16.6899	60.3873
19	17200333	17202452	BARC-047428-12928	19	29.32	12.7253	50.6411
19	17595663	17596525	BARC-047428-12928	19	29.32	18.7125	64.5925
19	18636441	18640433	BARC-047428-12928	19	29.32	18.9983	65.1495
19	19921815	19922443	BARC-047428-12928	19	29.32	16.3152	59.5551
19	19948072	19948441	BARC-047428-12928	19	29.32	16.6294	60.2542
19	20660154	20661400	BARC-047428-12928	19	29.32	16.2612	59.4338
19	20669419	20669834	BARC-047428-12928	19	29.32	9.18732	39.9354
19	22868466	22870843	BARC-047428-12928	19	29.32	17.5957	62.3291
19	23074599	23076028	BARC-047428-12928	19	29.32	11.936	48.4313
19	23254830	23256902	BARC-047428-12928	19	29.32	15.7345	58.2309
19	24211874	24214463	BARC-047428-12928	19	29.32	16.4519	59.8609
19	25112125	25114782	BARC-047428-12928	19	29.32	16.3998	59.7446
19	25520585	25524074	BARC-047428-12928	19	29.32	16.4653	59.8907
19	26660977	26664709	BARC-047428-12928	19	29.32	17.1577	61.4023
19	27083634	27083973	BARC-047428-12928	19	29.32	15.8297	58.4508
19	28753441	28756380	BARC-047428-12928	19	29.32	15.227	57.038
19	29127642	29128354	BARC-047428-12928	19	29.32	11.2267	46.3615
19	29128413	29128633	BARC-047428-12928	19	29.32	9.66734	41.514
19	29603254	29604845	BARC-047428-12928	19	29.32	12.2955	49.4497
19	29654379	29654812	BARC-047428-12928	19	29.32	14.4482	55.141
19	30049180	30050741	BARC-047428-12928	19	29.32	13.9828	53.9673
19	30428485	30430473	BARC-047428-12928	19	29.32	15.6304	57.9889
19	30455785	30456505	BARC-047428-12928	19	29.32	7.25499	33.1378
19	30529128	30530197	BARC-047428-12928	19	29.32	14.5091	55.2922
19	31180845	31181649	BARC-059443-15806	19	30.414	10.2194	43.2782
19	32186279	32186633	BARC-059443-15806	19	30.414	10.2008	43.2198
19	32687747	32690213	BARC-047428-12928	19	29.32	11.7882	48.0068
19	32853315	32854052	BARC-047428-12928	19	29.32	14.9459	56.3628
19	33084988	33086657	BARC-047428-12928	19	29.32	11.4524	47.0291
19	33443957	33445072	BARC-059443-15806	19	30.414	9.75402	41.7946
19	35253518	35253835	BARC-020457-04632	19	35.779	13.1227	51.7173
19	35259959	35260566	BARC-020457-04632	19	35.779	12.7282	50.6489
19	35394562	35395667	BARC-020457-04632	19	35.779	12.4681	49.9317
19	35516391	35518036	BARC-020457-04632	19	35.779	13.6725	53.168
19	35925573	35926465	BARC-020457-04632	19	35.779	9.3896	40.6057
19	36078901	36079781	BARC-020457-04632	19	35.779	13.7994	53.4966
19	36174393	36175372	BARC-020457-04632	19	35.779	14.0073	54.0299
19	36306642	36307534	BARC-020457-04632	19	35.779	14.4537	55.1545
19	36640932	36642446	BARC-020457-04632	19	35.779	6.73691	31.1879
19	38584594	38585055	NA	NA	NA	NA	NA
19	39304528	39304960	BARC-060795-16881	19	48.449	12.4889	49.9893
19	39470992	39471597	BARC-060795-16881	19	48.449	18.8551	64.8715
19	39896387	39896670	BARC-060795-16881	19	48.449	21.0592	68.915
19	40604242	40605168	NA	NA	NA	NA	NA
19	42852222	42853644	NA	NA	NA	NA	NA
19	45510543	45511431	NA	NA	NA	NA	NA
19	50530071	50531368	NA	NA	NA	NA	NA
20	204429	205284	BARC-065047-19054	20	1.029	5.37982	25.8065
20	729357	729839	BARC-028335-05836	20	11.353	21.1705	69.1064
20	993286	994848	BARC-028335-05836	20	11.353	18.6721	64.5129
20	1273879	1275991	BARC-057041-14548	20	17.031	19.0476	65.2447
20	1336937	1337382	BARC-057041-14548	20	17.031	18.1916	63.5541
20	1341929	1342433	BARC-057041-14548	20	17.031	9.81012	41.9755
20	1369497	1371049	BARC-057041-14548	20	17.031	25.3446	75.4932
20	1549058	1551182	BARC-057041-14548	20	17.031	21.6673	69.9464
20	3103759	3105368	BARC-057867-14973	20	29.164	15.5387	57.7746
20	3184130	3185041	BARC-052017-11314	20	19.964	14.249	54.6422
20	3185783	3187708	BARC-057867-14973	20	29.164	17.4605	62.0452
20	3523246	3523756	BARC-057867-14973	20	29.164	17.6565	62.4558
20	3530013	3531201	BARC-057867-14973	20	29.164	16.0669	58.9942
20	3682679	3683374	BARC-057867-14973	20	29.164	19.8464	66.7513
20	4122940	4123622	BARC-057867-14973	20	29.164	18.0898	63.3477
20	4123730	4125575	BARC-057867-14973	20	29.164	17.7253	62.5989
20	4186412	4187707	BARC-057867-14973	20	29.164	17.9264	63.0138
20	5116074	5116678	BARC-053829-12063	20	30.134	17.5342	62.2001
20	5922851	5924127	BARC-057867-14973	20	29.164	17.7414	62.6323
20	5957632	5958254	BARC-057867-14973	20	29.164	4.08735	20.2906
20	5978573	5980545	BARC-057867-14973	20	29.164	17.8071	62.7683
20	6050117	6051300	BARC-057867-14973	20	29.164	18.3582	63.8895
20	6893487	6895875	BARC-057867-14973	20	29.164	17.6477	62.4375
20	7549233	7549966	BARC-057867-14973	20	29.164	10.3802	43.7822
20	7583731	7584704	BARC-057867-14973	20	29.164	16.3145	59.5535
20	7651965	7652287	BARC-057867-14973	20	29.164	12.028	49.1098
20	7914153	7914972	BARC-053829-12063	20	30.134	17.8936	62.9466
20	9020651	9020925	BARC-057867-14973	20	29.164	12.8216	50.904
20	9020942	9021478	BARC-057867-14973	20	29.164	11.9475	48.4644
20	10160679	10161844	BARC-057867-14973	20	29.164	18.1285	63.4263
20	10169601	10172597	BARC-057867-14973	20	29.164	15.5384	57.774
20	10728975	10729175	BARC-057867-14973	20	29.164	11.5359	47.2738
20	10927917	10928744	BARC-057867-14973	20	29.164	13.0626	51.5562
20	11225324	11229337	BARC-057867-14973	20	29.164	18.4738	64.1204
20	11464438	11465348	BARC-057867-14973	20	29.164	15.8442	58.4843
20	11745656	11747551	BARC-057867-14973	20	29.164	14.872	56.1834
20	11827296	11829326	BARC-057867-14973	20	29.164	17.1062	61.2918
20	12162816	12164093	BARC-053829-12063	20	30.134	18.2229	63.6173
20	12282185	12283324	BARC-057867-14973	20	29.164	13.0816	51.6071
20	13484122	13485183	BARC-007732-00002	12	61.154	12.0445	48.7408
20	16657380	16658503	BARC-057867-14973	20	29.164	18.9519	65.0597
20	16850036	16850958	BARC-057867-14973	20	29.164	17.029	61.1258
20	16861117	16861923	BARC-057867-14973	20	29.164	9.76919	41.8436
20	16887561	16887897	BARC-058491-15307	20	37.561	12.2406	49.2956
20	17035560	17035981	BARC-057867-14973	20	29.164	14.1333	54.3502
20	17590684	17591655	BARC-057867-14973	20	29.164	14.7338	55.8462
20	20315314	20317640	BARC-057867-14973	20	29.164	16.4951	59.9569
20	22069387	22069814	BARC-053829-12063	20	30.134	17.2028	61.4987
20	22378426	22379341	BARC-057867-14973	20	29.164	10.0304	42.6805
20	23486678	23486918	NA	NA	NA	NA	NA
20	24617914	24620766	BARC-057867-14973	20	29.164	17.7458	62.6414
20	24972468	24973659	BARC-057867-14973	20	29.164	16.9154	60.8799
20	25487121	25487975	BARC-057867-14973	20	29.164	16.0261	58.9012
20	26129251	26130204	BARC-057867-14973	20	29.164	16.5363	60.0484
20	26271987	26272383	BARC-053829-12063	20	30.134	16.9745	61.008
20	26272452	26274162	BARC-057867-14973	20	29.164	16.3719	59.6823
20	26525290	26526328	BARC-057867-14973	20	29.164	17.9376	63.0369
20	26652847	26654210	BARC-057867-14973	20	29.164	17.3479	61.8075
20	27140096	27142319	BARC-057867-14973	20	29.164	17.3502	61.8123
20	27183591	27184268	BARC-057867-14973	20	29.164	7.84194	35.2801
20	27305681	27306173	BARC-057867-14973	20	29.164	15.1629	56.885
20	27616479	27618484	BARC-057867-14973	20	29.164	16.7682	60.5591
20	27808099	27808735	BARC-057867-14973	20	29.164	16.598	60.1849
20	28419594	28420594	BARC-053829-12063	20	30.134	17.1544	61.3953
20	28450786	28451225	BARC-057867-14973	20	29.164	13.5969	52.9711
20	28578772	28579692	BARC-057867-14973	20	29.164	16.5822	60.15
20	28579755	28580239	BARC-053829-12063	20	30.134	15.7977	58.377
20	28974349	28975530	BARC-057867-14973	20	29.164	16.7022	60.4145
20	29055815	29060097	BARC-057867-14973	20	29.164	17.4686	62.0624
20	29302429	29302761	BARC-057867-14973	20	29.164	10.2443	43.3567
20	29493346	29494762	BARC-057867-14973	20	29.164	18.3134	63.7997
20	29671722	29674008	BARC-057867-14973	20	29.164	17.0188	61.1036
20	29710744	29710898	BARC-057867-14973	20	29.164	15.5244	57.741
20	29807906	29809678	BARC-057867-14973	20	29.164	16.2436	59.3943
20	29838754	29841730	BARC-057867-14973	20	29.164	17.7819	62.7162
20	29846731	29847303	BARC-057867-14973	20	29.164	14.9977	56.488
20	29847861	29848584	BARC-053829-12063	20	30.134	14.5991	55.5148
20	30044521	30046095	BARC-057867-14973	20	29.164	16.6497	60.299
20	30061769	30062285	BARC-053829-12063	20	30.134	15.1797	56.9251
20	30753245	30753828	BARC-053829-12063	20	30.134	13.8404	53.6024
20	30842224	30843769	BARC-057867-14973	20	29.164	17.8489	62.8546
20	30844025	30844273	BARC-053829-12063	20	30.134	14.0931	54.2484
20	30844345	30844818	BARC-053829-12063	20	30.134	14.9664	56.4124
20	30951250	30952230	BARC-057867-14973	20	29.164	15.8401	58.475
20	30953540	30954027	BARC-053829-12063	20	30.134	8.33173	37.0152
20	31188170	31188720	BARC-058491-15307	20	37.561	9.9415	42.3969
20	31189602	31190561	BARC-053829-12063	20	30.134	15.043	56.5972
20	32135252	32135681	BARC-029803-06418	20	50.849	5.81601	27.5806
20	32476010	32477611	BARC-058491-15307	20	37.561	13.8942	53.7406
20	32700703	32701405	BARC-058491-15307	20	37.561	14.3501	54.8962
20	33234468	33236351	BARC-027790-06672	20	38.63	16.1348	59.1483
20	33236480	33237757	BARC-027790-06672	20	38.63	15.8267	58.4439
20	33240362	33241250	BARC-027790-06672	20	38.63	17.395	61.9072
20	33314386	33315292	BARC-027790-06672	20	38.63	14.5074	55.288
20	33431079	33432201	BARC-020245-04514	20	43.562	11.4376	46.9854
20	33521991	33522945	BARC-020245-04514	20	43.562	13.5915	52.9572
20	34811436	34812875	BARC-017311-02261	20	44.336	17.3371	61.7845
20	34895855	34896475	BARC-017311-02261	20	44.336	12.5403	50.1318
20	35887980	35888799	BARC-029803-06418	20	50.849	21.219	69.1895
20	43067252	43067773	BARC-060361-16629	20	92.027	7.46665	33.9184
20	45297378	45298030	BARC-064735-18787	20	106.953	12.0278	48.6933
20	46667786	46668669	BARC-048041-10476	20	111.275	1.81068	9.55819
